24 **Abstract**

25 **Objective:** The ictal *Harmonic* pattern (*H* pattern), produced by the non-linear  
26 characteristics of EEG waveforms, may hold significant potential for localizing the  
27 epileptogenic zone (EZ) in focal epilepsy. However, further validation is needed to  
28 establish the *H* pattern's effectiveness as a biomarker for measuring the EZ.

29 **Methods:** We retrospectively enrolled 131 patients diagnosed with drug-resistant  
30 focal epilepsy, all of whom had complete stereo-electroencephalographic (SEEG) data.  
31 From this cohort, we selected 85 patients for outcome analysis. We analyzed the  
32 morphological and time-frequency (TF) features of the *H* pattern using TF plots. A  
33 third quartile (Q3) threshold was applied to classify channels expressing either  
34 dominant (*Channel<sub>dH</sub> pattern*) or non-dominant *H* patterns (*Channel<sub>non-dH</sub> pattern*). We  
35 then examined associations between the morphological features of the *H* pattern and  
36 patients' clinical characteristics, as well as the correlations between the extent of  
37 channel removal and seizure outcomes.

38 **Results:** We found no significant correlations between the morphological features of  
39 the ictal *H* pattern and clinical factors, including lesional MRI findings, epileptic  
40 onset patterns, epilepsy type, pathology, or surgical outcomes. The non-localizable *H*  
41 pattern appeared exclusively in patients with non-focal onset patterns. Notably, the  
42 proportion of *Channel<sub>dH</sub> pattern* was higher in the seizure-onset zone (SOZ) compared  
43 to the early propagation zone. The seizure-free group demonstrated significantly  
44 higher removal proportions of *Channel<sub>dH</sub> patterns*, both within and outside the SOZ ( $p =$   
45  $0.014$ ;  $p = 0.036$ ), with AUCs of 0.606 and 0.660, respectively, in a seizure freedom  
46 prediction model. Survival analysis confirmed that complete removal of these regions  
47 correlated with long-term seizure freedom ( $p = 0.008$ ;  $p = 0.028$ ). Further subgroup  
48 analysis showed a significant correlation in neocortical epilepsy ( $p = 0.0004$ ;  $p =$   
49  $0.011$ ), but not in mesial temporal lobe epilepsy. Additionally, multivariate analysis  
50 identified the complete removal of *Channel<sub>dH</sub> pattern* as the only independent predictor  
51 for seizure freedom ( $p = 0.022$ ; OR 6.035, 95% CI 1.291-28.211).

52 **Conclusions:** Our study supports the notion that the dominance of the ictal *H* pattern,

53 regardless of its morphology, serves as a novel biomarker for the EZ in focal epilepsy.

54 The non-linearity in EEG waveforms provides new insights into understanding ictal

55 spreading propagation and offers potential improvements for surgical planning in

56 neocortical epilepsy.

57

58 **Keywords:** harmonic pattern; focal epilepsy; epileptogenic zone; epilepsy surgery;

59 seizure outcome

## 60 **Introduction**

61 Resective surgery currently remains the most effective treatment for drug-resistant  
62 epilepsy (DRE). However, only 50% of patients achieve prolonged seizure freedom  
63 following surgery. Despite advancements in intracranial electroencephalography  
64 (iEEG) technology, it has yet to surpass a 70% ceiling in achieving favorable surgical  
65 outcomes<sup>1-3</sup>. The success of the surgery largely depends on the precise localization  
66 and complete removal of the epileptogenic zone (EZ), which is defined as the brain  
67 area essential for generating seizures<sup>4</sup>. Postsurgical seizure freedom indicates that the  
68 EZ was likely successfully removed. Although the seizure-onset zone (SOZ) does not  
69 necessarily equate to the EZ<sup>5,6</sup>, experienced clinicians' visual identification of the  
70 SOZ is a crucial step in the process of localizing the EZ.

71 Many studies have aimed to identify ictal EEG biomarkers capable of quantitatively  
72 delineating the EZ. Established semi-quantitative algorithms, such as the  
73 epileptogenic index (EI)<sup>7</sup> and epileptogenic map<sup>8</sup>, have been shown to be effective in  
74 cases where ictal onset patterns include low-voltage fast activity. Additionally, the  
75 removal of areas exhibiting ictal high-frequency oscillations (HFOs) has been  
76 reported as a prognostic indicator of favorable seizure outcomes<sup>9-11</sup>. The concept of  
77 the EEG *fingerprint*, proposed as an ictal biomarker of the EZ, suggests a possible  
78 synchronous activation of GABAergic neurons at seizure onset<sup>12</sup>. Similarly, *brain*  
79 *chirp*<sup>13</sup> highlights the importance of fast EEG activity in defining the EZ.

80 In our previous study, we identified the *Harmonic* pattern (*H* pattern), a spectral  
81 feature of specific ictal EEG components that contains valuable information for  
82 seizure propagation and EZ localization. The *H* pattern is characterized by an  
83 equidistant spectral band distribution of varying frequencies on time-frequency (TF)  
84 plots. Generated by the specific non-sinusoidal waveforms, the ictal *H* pattern may  
85 represent periodically synchronized neural firings, rather than a methodological  
86 artifact. Furthermore, the *H* pattern is frequently observed in seizures with various  
87 onset patterns and across different seizure stages<sup>14</sup>. The dominance of the ictal *H*

88 pattern in different brain regions reflects higher non-linearity and has proven useful in  
89 localizing the EZ.

90 Despite its potential, the full spectrum of the ictal *H* pattern remains unclear. The *H*  
91 pattern shows significant variability in morphology across patients; however, within  
92 an individual patient, its morphology and spatial localization tend to remain consistent  
93 across seizures, emphasizing the personalized nature of ictal neural dynamics. In this  
94 expanded cohort, we first investigated clinical factors related to the morphological  
95 properties of the *H* pattern, specifically focusing on its clarity and shape. High clarity  
96 indicates a narrower frequency band with reduced background noise, while the shape  
97 of the spectral bands reflects changes in the frequency of ictal neural oscillations at a  
98 macroscopic level. This study aims to further support the hypothesis that the  
99 dominance of the ictal *H* pattern could serve as a novel biomarker for the EZ.  
100 Additionally, we analyzed the potential impact of the *H* pattern's morphological  
101 features.

102

## 103 **Methods**

### 104 *Selection of patient cohort*

105 We retrospectively reviewed 133 patients with drug-resistant epilepsy who had  
106 completed stereo-electroencephalography (SEEG) at the Second Affiliated Hospital  
107 Zhejiang University School of Medicine (SAHZU) between April 2013 and October  
108 2022. We excluded two patients diagnosed with hypothalamic hamartoma from the  
109 study. Therefore, we performed *H* pattern analysis on the remaining 131 cases. From  
110 this cohort, we selected 85 patients for outcome analysis based on the following  
111 inclusion criteria (**Figure S1**): (1) a focal-onset pattern on SEEG with a clearly  
112 defined SOZ localized to a discrete cortical region; (2) undergoing either resective  
113 surgery or thermocoagulation treatment; (3) recording at least two habitual clinical  
114 seizures during SEEG monitoring; (4) identifying a discernible and localizable ictal *H*  
115 pattern (as described in the *Identification of ictal H pattern* section); (5) a follow-up

116 period of at least 12 months after surgery. The Medical Ethics Committee of SAHZU  
117 approved this study (Study No. 2023-1260, 2021-0585). We obtained written  
118 informed consent from each participant.

119

### 120 *SEEG evaluation*

121 All patients were recommended for SEEG evaluation during a multidisciplinary  
122 patient management conference. The non-invasive presurgical evaluation included a  
123 detailed medical history, neuropsychological assessment, scalp video-EEG  
124 monitoring, 3.0-Tesla cerebral MRI, and interictal <sup>18</sup>F-fluorodeoxyglucose positron  
125 emission tomography (<sup>18</sup>F-FDG-PET). The procedure for SEEG electrode  
126 implantation has been previously described <sup>15</sup>. Based on the working hypothesis,  
127 multiple-contact intracerebral electrodes (8-16 contacts, each 2 mm in length, 0.8 mm  
128 in diameter, and spaced 1.5 mm apart) were implanted using a robotic arm-assisted  
129 system. SEEG signals were recorded at sampling rates of either 1,000 or 2,000 Hz  
130 using EEG systems with 256 channels (Nihon Kohden) or 128 channels (Xltek,  
131 Natus). The anatomical locations of each contact along the electrode trajectory in all  
132 subjects were confirmed by co-registering post-implantation CT scans with  
133 pre-implantation MRI using *Sinovation 2.0* <sup>16</sup>. A three-dimensional schematic  
134 diagram of the reconstruction is provided in the flowchart (**Figure 1C**).

135

### 136 *Surgical outcome*

137 Following SEEG evaluation, patients underwent either resective surgery or laser  
138 ablation. The planning of these surgical interventions was conducted independently of  
139 this study. Each contact was classified as either *removed* or *non-removed* based on  
140 postsurgical MRI evaluations. Surgical outcomes were assessed at the most recent  
141 follow-up and patients were categorized as either seizure-free (SF, Engel class Ia) or  
142 not seizure-free (NSF, >Engel class Ia) <sup>17</sup>.

143

#### 144 *Visual EEG analysis*

145 Two experienced and board-certified neurophysiologists reviewed the SEEG data to  
146 identify the SOZ and the rapid propagation zone (PZ) using our previously established  
147 methods<sup>15, 18</sup>. The SOZ is defined as the brain area that shows the earliest changes on  
148 SEEG. The PZ is characterized by the rapid spread of ictal activity within 3-5 seconds  
149 after seizure onset. Areas outside these defined zones were classified as 'other  
150 regions.' Both the PZ and these 'other regions' were collectively categorized as  
151 non-SOZ.

152

#### 153 *Identification of ictal H pattern*

154 We selected only contacts within cortical gray matter for quantitative analysis. We  
155 analyzed all EEG data using a bipolar montage. For each identified seizure, we  
156 extracted a 110-second segment of SEEG data: 10 seconds before and 100 seconds  
157 after the EEG onset. Additionally, we collected a segment of preictal EEG data  
158 ranging from -230 to -120 seconds before EEG onset as baseline data for  
159 normalization. To enhance the reliability of our results, we applied two analytical  
160 methods: the Morlet wavelet transform<sup>19</sup> and the multitaper method<sup>20, 21</sup> in the TF  
161 analysis.

162 We identified the ictal *H* pattern from TF maps based on the following criteria: the  
163 presence of two or more distinct high-intensity bands with varying frequencies  
164 occurring at any point during a seizure, with equal frequency intervals between  
165 adjacent bands (**Figure 1A**). For each patient, we analyzed only the initially occurring  
166 *H* pattern. We estimated various features of the ictal *H* pattern, including its shape,  
167 clarity, onset and end times, fundamental and maximal frequencies, frequency  
168 intervals, and the number of bands. If the *H* pattern was consistently stereotyped  
169 across different seizures for a single patient, we included only one data set in the  
170 analysis. To determine the dominance of the *H* pattern, we established a threshold

171 known as  $Q3$ , which represents the upper quartile (75th percentile) of the data  
172 distribution for the maximal count of frequency bands per patient. We calculated  $Q3$   
173 using the following formula:

$$174 \quad Q3 = (n + 1) * 3/4 ,$$

175 where  $n$  denotes the highest count of frequency bands observed across all channels. If  
176 the number of bands in a channel showing the ictal  $H$  pattern ( $Channel_H\ pattern$ )  
177 exceeds the  $Q3$  threshold, we marked it as exhibiting a dominant  $H$  pattern  
178 ( $Channel_{dH\ pattern}$ ). Conversely, a channel not meeting this threshold was classified as  
179 expressing a non-dominant  $H$  pattern ( $Channel_{non-dH\ pattern}$ ) (**Figure 1D**). A localizable  
180  $H$  pattern should be consistent across seizures and present in specific regions. If no  
181 gradient in band numbers was observed across all channels, the  $H$  pattern was  
182 classified as non-localizable.

183

#### 184 ***Morphology of Ictal Harmonic Pattern***

185 We classified the clarity of the  $H$  pattern into two levels. Grade A indicated a highly  
186 clear frequency band with distinct borders against the background activity. Grade B  
187 referred to a less clear frequency band with fuzzier borders. We identified three  
188 distinct shapes of the  $H$  pattern: Shape 1 resembled a parabola, where the fundamental  
189 frequency initially increases and then decreases; Shape 2 appeared as a declining line,  
190 representing a decrease in the frequency harmonics of the spectral band; and Shape 3  
191 took the form of an ascending line, indicating an increase in the frequency harmonics  
192 of the spectral band. This resulted in a total of six categories: A1, A2, A3, B1, B2, and  
193 B3 (**Figure S2**). Initially, two investigators (Ye L.Q. and Hu L.L.) performed these  
194 classifications. In cases of disagreement, a third epileptologist (Wang S.) made the  
195 final decision.

196

#### 197 ***Prediction of Surgical Outcome***

198 For each patient, we categorized channels as either SOZ or non-SOZ based on visual



199 analysis, and as *Channel<sub>dH</sub> pattern* or *Channel<sub>non-dH</sub> pattern* based on TF analysis. We  
200 determined the ratio of removed channels using the following formula:

$$Removal\ ratio(\%) = \frac{\#Channel_{removed}}{\#Channel_{removed} + \#Channel_{non-removed}} \times 100\%.$$

201 To estimate the correlation between the removal of *Channel<sub>dH</sub> pattern* and seizure  
202 freedom, we used the *Chi-Squared* test and receiver operating characteristic (ROC)  
203 curve analysis, from which we derived the area under the curve (AUC). We then  
204 generated Kaplan-Meier (KM) curves to depict the cumulative probability of  
205 achieving seizure freedom. We compared the retention of seizure freedom between  
206 groups using the log-rank test, including patients with complete (100%) removal and  
207 those with incomplete or no removal (0-100%).

208

## 209 **Statistical Analysis**

210 We used MATLAB 2021a (The MathWorks, Inc.) and SPSS 26.0 for statistical  
211 analysis. We evaluated the normality of the distribution of all continuous variables  
212 using the *Kolmogorov-Smirnov* test. Normally distributed variables were presented as  
213 mean  $\pm$  standard deviation (SD), while non-normally distributed variables were  
214 reported as median (interquartile range, IQR). We expressed categorical variables as  
215 frequencies. We applied an *unpaired t*-test or a nonparametric *Mann-Whitney U* test  
216 to analyze continuous variables, and we assessed categorical variables using the  
217 *Chi-Squared* test. We also conducted a binary regression analysis to identify  
218 predictive factors affecting surgical outcomes. For multiple comparisons, we  
219 employed the Bonferroni correction method.  $p < 0.05$  represents statistically  
220 significant.

221

## 222 **Results**

### 223 *Patient Demographics*

224 In the entire cohort, 75.6% (99 patients) exhibited a focal-onset pattern, while the

225 remaining 24.4% (32 patients) had a non-focal onset pattern (**Table S1**). Among those  
226 with a focal-onset pattern, 92.9% (92 patients) displayed an ictal *H* pattern, all of  
227 which were localizable. In contrast, 93.8% (30 patients) of those with a non-focal  
228 onset pattern exhibited at least one ictal *H* pattern. Of these, 80.0% (24 patients) were  
229 localizable, and 20.0% (6 patients) were non-localizable. Most patients presented with  
230 only one type of *H* pattern. However, two different types of *H* pattern were observed  
231 exclusively in approximately 20% of patients with a non-focal onset pattern (**Table**  
232 **S1**).

233 Of the 85 patients included in the outcome analysis, 38.9% (33 patients) had  
234 participated in our previous *H* pattern study (**Table 1**)<sup>14</sup>. In the current cohort, 61.2%  
235 (52 patients) achieved seizure freedom after an average follow-up period of 47.8  
236 months. We found no significant differences between the SF and NSF groups  
237 regarding age at disease onset, age at SEEG recording, or the  
238 lateralization/localization of seizures. The incidence of detectable abnormalities on  
239 MRI was similar between the two groups (75.0% in the SF group and 72.7% in the  
240 NSF group,  $p = 0.816$ ). However, the NSF group had a significantly higher number of  
241 implanted electrodes ( $p = 0.025$ ). Focal cortical dysplasia (FCD) □ was the most  
242 common pathological finding, occurring in 34.1% of patients. Among those with  
243 malformations of cortical development (MCD) other than FCD □ (19.5% of patients),  
244 11 had FCD I, 3 had tuberous sclerosis complex, 1 had FCD □c, and 1 had a mild  
245 malformation of cortical development with oligodendroglial hyperplasia and epilepsy.  
246 Patients with FCD □a were included in the hippocampal sclerosis (HS) group. We  
247 observed a significant difference in the pathological findings between the SF and NSF  
248 groups ( $p = 0.014$ ), particularly between FCD □ and gliosis/non-specific findings.

249

### 250 *Morphology, Distribution and Parameters of Ictal Harmonic Pattern*

251 We summarized the morphological characteristics of the ictal *H* pattern in patients  
252 who exhibited only one type of *H* pattern in **Table S2**. The most frequently observed

253 shapes were the declining line (57.3%) and the parabola (40.2%) (**Figure S2**). Our  
254 analysis revealed no correlation between the clarity or shape of the  $H$  pattern and  
255 clinical factors, including the presence of lesional MRI findings, focal-onset pattern,  
256 neocortical epilepsy, pathology, or surgical outcome.

257 Out of 85 patients with focal-onset patterns, we identified both the SOZ and the PZ in  
258 65 patients. Within these zones, the proportion of channels exhibiting the ictal  $H$   
259 pattern was significantly higher in the SOZ (100.0%, IQR 57.3-100%) compared to  
260 the PZ (26.3%, IQR 0-50.0%;  $p < 0.0001$ ) (**Figure 2A**). Similarly, the ictal  $dH$  pattern  
261 appeared more frequently in the SOZ (38.5%, IQR 16.0-80.0%) than in the PZ (0%,  
262 IQR 0-5.8%;  $p < 0.0001$ ) (**Figure 2A**). The ictal  $H$  pattern was less common in other  
263 regions, and we did not observe a significant difference in the distribution of the  
264 non- $dH$  pattern between the SOZ and PZ. Among the 65 patients, 37 exhibited the  
265 ictal  $H$  pattern simultaneously in both the SOZ and PZ. The number of frequency  
266 bands of the ictal  $H$  pattern was notably higher in the SOZ (3.1, IQR 2.2-6.2)  
267 compared to the PZ (2.5, IQR 1.9-4.2;  $p < 0.0001$ ), as was the maximal frequency  
268 (SOZ, 118.8, IQR 92.5-333.0 Hz; PZ, 90.0, IQR 66.3-112.6 Hz;  $p < 0.0001$ ). The  
269 onset time of the ictal  $H$  pattern did not differ between the SOZ and PZ, indicating  
270 almost simultaneous initiation across these regions. Furthermore, we did not observe  
271 differences in the termination, fundamental frequency, or frequency interval of the  
272 ictal  $H$  pattern between the SOZ and PZ (**Figure 2B-D**). These parameters of the ictal  
273  $H$  pattern also did not differ between the SF and NSF groups (**Figure 3B-E**). In the  
274 remaining 20 patients without a PZ, the  $dH$  pattern was predominantly expressed in  
275 88.9% of channels within the SOZ (IQR, 54.6-88.9%) and was rarely observed in  
276 other regions.

277

### 278 ***Ictal Dominant Harmonic Pattern***

279 **Figure 3A** shows that a higher removal ratio of the  $Channel_{dH\ pattern}$  significantly  
280 correlates with achieving seizure freedom ( $p = 0.014$ ). The SF group demonstrated a

281 higher removal ratio of the *Channel<sub>dH pattern</sub>* within non-SOZ (100.0, IQR 100-100%)  
282 compared to the NSF group (100.0, IQR 0-100%;  $p = 0.036$ ).

283

#### 284 ***Predictive Value of Removing Ictal Dominant Harmonic Pattern***

285 Regression analysis identified several independent factors significantly associated  
286 with achieving seizure freedom. These factors include the complete removal of the  
287 *Channel<sub>dH pattern</sub>* ( $p = 0.022$ ; OR 6.035, 95% CI 1.291-28.211), FCD □ or other MCD  
288 types (as opposed to gliosis or other non-specific pathologies), and a smaller number  
289 of implanted electrodes (**Figure 4**). Additionally, the association between the  
290 complete removal of the *Channel<sub>dH pattern</sub>* and seizure freedom was supported by an  
291 analysis showing statistical significance ( $p = 0.031$ , AUC = 0.606) (**Figure 5**). The  
292 highest AUC value of 0.660 was recorded when considering the complete removal of  
293 the *Channel<sub>dH pattern</sub>* within non-SOZ, highlighting the importance of the ictal dH  
294 pattern for localizing the EZ (**Figure S3**).

295

#### 296 ***Survival Analysis***

297 **Figure 6** and **Figure S4** illustrate the 10-year prognosis of seizure freedom for  
298 patients who underwent *complete removal* (100%) compared to those with *incomplete*  
299 or *no removal* (0~100%). Among the 85 patients in the cohort, 58.2% achieved  
300 seizure freedom at the 10-year mark. Notably, patients who underwent complete  
301 removal of the *Channel<sub>dH pattern</sub>* had a significantly higher probability of attaining  
302 long-term seizure freedom ( $p = 0.008$ ). Specifically, among the 37 patients with  
303 complete removal of the *Channel<sub>dH pattern</sub>* within non-SOZ, there was also an increased  
304 likelihood of achieving seizure freedom ( $p = 0.028$ ). In cases of neocortical epilepsy,  
305 the complete removal of the *Channel<sub>dH pattern</sub>* was strongly associated with long-term  
306 seizure freedom ( $p=0.0004$ ), regardless of whether the removal occurred within the  
307 SOZ ( $p = 0.013$ ) or non-SOZ ( $p = 0.011$ ) (**Figure S5**). In contrast, for mesial temporal  
308 lobe epilepsy (mTLE), complete removal of the SOZ, rather than the *Channel<sub>dH pattern</sub>*,

309 was significantly associated with better long-term seizure freedom outcomes ( $p =$   
310 0.019).

311

## 312 **Discussion**

313 The ictal  $H$  pattern, which reflects the non-linear features of ictal SEEG signals on TF  
314 maps, may serve as an innovative ictal biomarker and offer a new approach for  
315 delineating the boundary of the EZ. Our key findings reveal: (1) In patients with focal  
316 onset patterns, the morphology of the ictal  $H$  pattern is consistent within individuals  
317 but heterogeneous across the cohort; (2) the morphological features of the ictal  $H$   
318 pattern do not correlate with clinical variables; (3) the dominance of the ictal  $H$   
319 pattern indicates high epileptogenicity, and removing regions that exhibit this pattern  
320 is crucial for achieving seizure freedom in focal epilepsy, particularly in neocortical  
321 epilepsy.

322 Previous studies have introduced various quantitative biomarkers for measuring  
323 spectral components of SEEG signals, including EI<sup>7,22</sup>, HFOs<sup>23</sup>, and ictal non-linear  
324 metrics such as the  $h^2$  coefficient<sup>24,25</sup>, coherence analysis<sup>26,27</sup>, entropy<sup>28,29</sup>, and  
325 infraslow activity<sup>30-32</sup>. These computational EEG markers aim to enhance the  
326 precision of EZ delineation. Our findings suggest that the ictal  $dH$  pattern could be a  
327 valuable biomarker for localizing the core epileptogenic cortex across different brain  
328 regions. Visual inspection showed that the distribution of the ictal  $H$  pattern aligned  
329 with the ictal onset zone, regardless of whether it was focal-, multifocal-, or  
330 diffuse-onset. In individuals with focal-onset patterns, the ictal  $H$  pattern typically  
331 exhibited a consistent spatial distribution across various seizures. In contrast,  
332 individuals with non-focal onset patterns displayed variable types of the ictal  $H$   
333 pattern, indicating an unstable seizure propagation pattern. The near-simultaneous  
334 onset of the ictal  $H$  pattern across different regions, along with a uniform fundamental  
335 frequency, suggests clear inter-regional synchronization during this period. Notably,  
336 our findings indicate that regions showing the  $dH$  pattern can extend into the PZ  
337 beyond the boundary of the SOZ. As our previous research indicated, the  $H$  pattern

338 reflects spectral skewness or asymmetry in EEG waveforms, and the  $dH$  pattern  
339 represents stronger inter-regional synchronization during seizure evolution,  
340 particularly in focal epilepsy. These findings further support the utility of the  $dH$   
341 pattern as a non-linear feature in delineating the EZ. Future clinical practices in  
342 defining the EZ would benefit from incorporating an integrated EEG biomarker that  
343 includes analysis of the  $dH$  pattern.

344 We analyzed the morphological features of the  $H$  pattern in terms of shape and clarity.  
345 The shape of the spectral bands in the  $H$  pattern reflects variations in the frequency of  
346 synchronized neural oscillations. The most frequently observed shape is a declining  
347 line, which closely resembles a spectral signature known as *chirps*<sup>33-35</sup>. This shape  
348 may indicate a decline in neural firing, possibly due to increased inhibition. In our  
349 cohort, nearly half of the SOPs exhibiting low-frequency activity (LVFA) expressed  
350 *chirp*<sup>13</sup> patterns, with proportions similar to those of the parabolic shape. We propose  
351 that some  $H$  patterns with a parabolic shape and very short upward lines might be  
352 classified as chirps due to the limitations of visual inspection. This potential  
353 misclassification could narrow the scope of the ictal  $H$  pattern and limit its  
354 applicability. A corticothalamic computational model has similarly elucidated how  
355 changes in physiological parameters affect the dynamics of tonic-clonic seizures,  
356 similar to the  $H$  pattern. This model revealed that increasing the connection strength  
357 enhances the power, count, and duration of harmonic bands<sup>36</sup>. Conversely, the clarity  
358 of the  $H$  pattern signifies the distinctness of the harmonic signals against the  
359 background. A highly clear  $H$  pattern is characterized by a narrow frequency band  
360 with minimal noise. Interestingly, these morphological properties do not correlate  
361 with clinical factors such as seizure-onset pattern, seizure origin, MRI findings,  
362 pathological findings, or seizure outcome. The primary clinically relevant aspect of  
363 the  $H$  pattern is its degree of non-linearity. Regardless of its shape, the prominence of  
364 the  $H$  pattern indicates epileptogenicity, and its complete removal has been linked to  
365 the potential achievement of seizure freedom.

366 We observed a stronger association between the  $dH$  pattern and long-term seizure

367 freedom in neocortical epilepsy compared to mTLE. Previous studies have reported  
368 that patients with mTLE generally experience more favorable surgical outcomes than  
369 those with neocortical epilepsy<sup>37</sup>. Additionally, the classification of seizure outcomes  
370 can vary among patients. Therefore, we used Engel class Ia as the criterion for a  
371 favorable outcome to evaluate the efficacy of the *dH* pattern in localizing the EZ.  
372 Earlier iEEG studies have indicated that the extent of SOZ removal does not always  
373 correlate with seizure freedom across all patients<sup>38,39</sup>. In contrast, we found that, for  
374 mTLE, the complete removal of the SOZ had a stronger correlation with long-term  
375 seizure freedom than the *dH* pattern. Furthermore, our current mTLE cohort included  
376 more MRI-negative cases compared to our previous cohort<sup>14</sup>. Surgical outcomes in  
377 MRI-negative cases are usually less favorable compared to those in TLE-HS<sup>40,41</sup>,  
378 suggesting a more extensive epileptogenic network in MRI-negative TLE. Previous  
379 research has highlighted differences in the involved neural networks between mTLE  
380 and neocortical epilepsy. For instance, an <sup>18</sup>F-FDG-PET study revealed distinct  
381 metabolic profiles between these two types of epilepsy, suggesting variations in  
382 seizure propagation<sup>42</sup>. Additionally, an iEEG study showed that the interictal  
383 epileptogenic network in mTLE exhibits a more regular pattern of graph connectivity  
384 compared to neocortical epilepsy<sup>43</sup>. It is well-recognized that epileptic networks  
385 differ between mTLE and neocortical temporal lobe epilepsy, as well as between TLE  
386 and extra-TLE<sup>44,45</sup>. A longer follow-up period is necessary to assess the final  
387 prognosis in patients with mTLE and to further estimate the value of the *H* pattern in  
388 this population.

389 Nevertheless, our study has several limitations. First, we based the determination of  
390 the *H* pattern's dominance solely on visual interpretation throughout the study. Future  
391 investigations should focus on optimizing the definition of the *dH* pattern and  
392 developing a more automated algorithm to quantify the *H* pattern. This would  
393 enhance the precision and objectivity of the analysis. We plan to create a quantitative  
394 index for the *H* pattern to address this issue. Additionally, we did not analyze the  
395 occurrence of the second *H* pattern during the later ictal stage of one seizure in this

396 study, which warrants further investigation.

397

### 398 **Conclusions**

399 In focal epilepsy, the dominance of the ictal *H* pattern offers new insights for  
400 localizing the EZ, regardless of its morphology. The distinct non-linear feature of the  
401 H pattern has significant implications for presurgical assessments and surgical  
402 planning. Applying this biomarker in neocortical epilepsy may offer greater value in  
403 achieving long-term favorable outcomes compared to mTLE.

404

### 405 **Data availability**

406 The that support the findings of this study are available upon reasonable request from  
407 the corresponding author.

### 408 **Acknowledgements**

409 This study received support from the National Natural Science Foundation of China  
410 (grant number: 82171437, 82301636, 82471469) and the Major Program of the  
411 National Natural Science Foundation of Zhejiang Province (grant number:  
412 LD24H090003).

### 413 **Disclosures**

414 The authors have no conflicts of interest to disclose related to this study.

### 415 **Supplementary material**

416 Supplementary material is available online.



417 **References**

- 418 1. Cardinale F, Rizzi M, Vignati E, et al. Stereoelectroencephalography:  
419 retrospective analysis of 742 procedures in a single centre. *Brain*  
420 2019;142:2688-2704.
- 421 2. Jehi L, Morita-Sherman M, Love TE, et al. Comparative Effectiveness of  
422 Stereotactic Electroencephalography Versus Subdural Grids in Epilepsy Surgery. *Ann*  
423 *Neurol* 2021;90:927-939.
- 424 3. Sivaraju A, Hirsch L, Gaspard N, et al. Factors Predicting Outcome After  
425 Intracranial EEG Evaluation in Patients With Medically Refractory Epilepsy.  
426 *Neurology* 2022;99:e1-e10.
- 427 4. Vakharia VN, Duncan JS, Witt JA, Elger CE, Staba R, Engel J, Jr. Getting the  
428 best outcomes from epilepsy surgery. *Ann Neurol* 2018;83:676-690.
- 429 5. Rosenow F, Lüders H. Presurgical evaluation of epilepsy. *Brain*  
430 2001;124:1683-1700.
- 431 6. Widjaja E, Li B, Schinkel CD, et al. Cost-effectiveness of pediatric epilepsy  
432 surgery compared to medical treatment in children with intractable epilepsy. *Epilepsy*  
433 *Res* 2011;94:61-68.
- 434 7. Bartolomei F, Chauvel P, Wendling F. Epileptogenicity of brain structures in  
435 human temporal lobe epilepsy: a quantified study from intracerebral EEG. *Brain*  
436 2008;131:1818-1830.
- 437 8. David O, Blauwblomme T, Job AS, et al. Imaging the seizure onset zone with  
438 stereo-electroencephalography. *Brain* 2011;134:2898-2911.
- 439 9. Ochi A, Otsubo H, Donner EJ, et al. Dynamic changes of ictal high-frequency  
440 oscillations in neocortical epilepsy: using multiple band frequency analysis. *Epilepsia*  
441 2007;48:286-296.
- 442 10. Modur PN, Zhang S, Vitaz TW. Ictal high-frequency oscillations in neocortical  
443 epilepsy: implications for seizure localization and surgical resection. *Epilepsia*  
444 2011;52:1792-1801.
- 445 11. Fujiwara H, Greiner HM, Lee KH, et al. Resection of ictal high-frequency

- 446 oscillations leads to favorable surgical outcome in pediatric epilepsy. *Epilepsia*  
447 2012;53:1607-1617.
- 448 12. Grinenko O, Li J, Mosher JC, et al. A fingerprint of the epileptogenic zone in  
449 human epilepsies. *Brain* 2018;141:117-131.
- 450 13. Di Giacomo R, Burini A, Chiarello D, et al. Ictal fast activity chirps as markers of  
451 the epileptogenic zone. *Epilepsia* 2024;65:e97-e103.
- 452 14. Lingli H, Lingqi Y, Hongyi Y, et al. Harmonic patterns embedding ictal EEG  
453 signals in focal epilepsy: a new insight into the epileptogenic zone. *medRxiv*  
454 2024:2023.2012.2020.23300274.
- 455 15. Hu L, Xiong K, Ye L, et al. Ictal EEG desynchronization during low-voltage fast  
456 activity for prediction of surgical outcomes in focal epilepsy. *J Neurosurg* 2022:1-10.
- 457 16. Tadel F, Baillet S, Mosher JC, Pantazis D, Leahy RM. Brainstorm: a user-friendly  
458 application for MEG/EEG analysis. *Comput Intell Neurosci* 2011;2011:879716.
- 459 17. Engel J. Outcome with respect to epileptic seizures. 1993.
- 460 18. Wang S, So NK, Jin B, et al. Interictal ripples nested in epileptiform discharge  
461 help to identify the epileptogenic zone in neocortical epilepsy. *Clin Neurophysiol*  
462 2017;128:945-951.
- 463 19. Bernardino A, Santos-Victor J. A Real-Time Gabor Primal Sketch for Visual Attention.  
464 2005; Berlin, Heidelberg: Springer Berlin Heidelberg: 335-342.
- 465 20. Thomson DJ. Spectrum estimation and harmonic analysis. *Proceedings of the*  
466 *IEEE* 1982;70:1055-1096.
- 467 21. Babadi B, Brown EN. A review of multitaper spectral analysis. *IEEE Trans*  
468 *Biomed Eng* 2014;61:1555-1564.
- 469 22. Aubert S, Wendling F, Regis J, et al. Local and remote epileptogenicity in focal  
470 cortical dysplasias and neurodevelopmental tumours. *Brain* 2009;132:3072-3086.
- 471 23. González Otárola KA, von Ellenrieder N, Cuello-Oderiz C, Dubeau F, Gotman J.  
472 High-Frequency Oscillation Networks and Surgical Outcome in Adult Focal Epilepsy.  
473 *Ann Neurol* 2019;85:485-494.
- 474 24. Bartolomei F, Lagarde S, Wendling F, et al. Defining epileptogenic networks:

- 475 Contribution of SEEG and signal analysis. *Epilepsia* 2017;58:1131-1147.
- 476 25. Hu L, Xiong K, Ye L, et al. Ictal EEG desynchronization during low-voltage fast  
477 activity for prediction of surgical outcomes in focal epilepsy. *J Neurosurg*  
478 2023;139:238-247.
- 479 26. Li YH, Ye XL, Liu QQ, et al. Localization of epileptogenic zone based on graph  
480 analysis of stereo-EEG. *Epilepsy Res* 2016;128:149-157.
- 481 27. Ren Y, Cong F, Ristaniemi T, Wang Y, Li X, Zhang R. Transient seizure onset  
482 network for localization of epileptogenic zone: effective connectivity and graph  
483 theory-based analyses of ECoG data in temporal lobe epilepsy. *J Neurol*  
484 2019;266:844-859.
- 485 28. Travnicek V, Klimes P, Cimbalnik J, et al. Relative entropy is an easy-to-use  
486 invasive electroencephalographic biomarker of the epileptogenic zone. *Epilepsia*  
487 2023;64:962-972.
- 488 29. Bratu IF, Makhalova J, Garnier E, et al. Permutation entropy-derived parameters  
489 to estimate the epileptogenic zone network. *Epilepsia* 2023.
- 490 30. Rodin E, Modur P. Ictal intracranial infraslow EEG activity. *Clin Neurophysiol*  
491 2008;119:2188-2200.
- 492 31. Kanazawa K, Matsumoto R, Imamura H, et al. Intracranially recorded ictal direct  
493 current shifts may precede high frequency oscillations in human epilepsy. *Clin*  
494 *Neurophysiol* 2015;126:47-59.
- 495 32. Nakatani M, Inouchi M, Daifu-Kobayashi M, et al. Ictal direct current shifts  
496 contribute to defining the core ictal focus in epilepsy surgery. *Brain Commun*  
497 2022;4:fcac222.
- 498 33. Schiff SJ, Colella D, Jacyna GM, et al. Brain chirps: spectrographic signatures of  
499 epileptic seizures. *Clin Neurophysiol* 2000;111:953-958.
- 500 34. Breakspear M, Roberts JA, Terry JR, Rodrigues S, Mahant N, Robinson PA. A  
501 unifying explanation of primary generalized seizures through nonlinear brain  
502 modeling and bifurcation analysis. *Cereb Cortex* 2006;16:1296-1313.
- 503 35. Dutta S, Iyer KK, Vanhatalo S, Breakspear M, Roberts JA. Mechanisms  
504 underlying pathological cortical bursts during metabolic depletion. *Nat Commun*

505 2023;14:4792.

506 36. Deeba F, Sanz-Leon P, Robinson PA. Effects of physiological parameter  
507 evolution on the dynamics of tonic-clonic seizures. *PLoS One* 2020;15:e0230510.

508 37. Spencer S, Huh L. Outcomes of epilepsy surgery in adults and children. *Lancet*  
509 *Neurol* 2008;7:525-537.

510 38. Khan M, Chari A, Seunarine K, et al. Proportion of resected seizure onset zone  
511 contacts in pediatric stereo-EEG-guided resective surgery does not correlate with  
512 outcome. *Clin Neurophysiol* 2022;138:18-24.

513 39. Thomas J, Kahane P, Abdallah C, et al. A Subpopulation of Spikes Predicts  
514 Successful Epilepsy Surgery Outcome. *Ann Neurol* 2023;93:522-535.

515 40. Fong JS, Jehi L, Najm I, Prayson RA, Busch R, Bingaman W. Seizure outcome  
516 and its predictors after temporal lobe epilepsy surgery in patients with normal MRI.  
517 *Epilepsia* 2011;52:1393-1401.

518 41. McIntosh AM, Wilson SJ, Berkovic SF. Seizure outcome after temporal  
519 lobectomy: current research practice and findings. *Epilepsia* 2001;42:1288-1307.

520 42. Zhu HY, Tang YX, Xiao L, et al. Metabolic profiles and correlation with surgical  
521 outcomes in mesial versus neocortical temporal lobe epilepsy. *CNS Neurosci Ther*  
522 2023;29:2656-2665.

523 43. Bartolomei F, Bettus G, Stam CJ, Guye M. Interictal network properties in mesial  
524 temporal lobe epilepsy: a graph theoretical study from intracerebral recordings. *Clin*  
525 *Neurophysiol* 2013;124:2345-2353.

526 44. González Otárula KA, Schuele S. Networks in Temporal Lobe Epilepsy.  
527 *Neurosurg Clin N Am* 2020;31:309-317.

528 45. Hall GR, Hutchings F, Horsley J, et al. Epileptogenic networks in extra temporal  
529 lobe epilepsy. *Netw Neurosci* 2023;7:1351-1362.

530

531 **Figure Legends**

532 **Figure 1. Examples and characteristics of the *H* pattern (data from patient #057).**

533 (A) Ictal SEEG recordings from both SOZ and PZ of a patient with right parietal focal  
534 cortical dysplasia showing bursts of high-amplitude poly-spikes followed by  
535 low-voltage fast activity at seizure onset. Below the SEEG recordings are  
536 corresponding time-frequency plots of the two channels. An ictal *H* pattern could be  
537 identified in both plots: two or more unique high-intensity spectral bands with varying  
538 frequency starting at 4 s (red arrow) after 0 s (seizure onset), and ending at 19 s (red  
539 arrow). The frequencies of the bottom and top spectral bands are defined as the  
540 *fundamental frequency* and *maximal frequency*, respectively (yellow arrow).  
541 Importantly, the ictal *H* pattern exhibits a distinctive feature of equidistant distribution  
542 on the TF plots. For instance, at 6.3 s (long blue dotted arrows), the frequency interval  
543 between adjacent spectral bands is nearly uniform, at approximately 26-28 Hz, as  
544 observed in the power spectral density diagrams. The ictal *H* pattern shown in the two  
545 channels are classified as a 'dominant *H* pattern (d*H* pattern)' and a 'non-dominant *H*  
546 pattern (non-d*H* pattern)', respectively. (B) 3D representation of an example SEEG  
547 exploration. Electrode contacts are categorized into three regions: the SOZ (red dots),  
548 the PZ (orange dots), and the other regions (blue dots), according to a patient's ictal  
549 SEEG recordings. (C) Total number of visually determined spectral bands on the TF  
550 plot of each channel each time a seizure is counted. Channels are then ranked based  
551 on the number of bands, and if a channel's count exceeds the threshold of  $Q_3$ , it is  
552 marked as expressing the ictal dominant *H* pattern. SEEG, stereo-electroencephalography; SOZ, seizure-onset zone; PZ, early propagation zone;  
553 *H* pattern, *Harmonic* pattern;  $Q_3$ , the 75th percentile of data distribution.

555

556 **Figure 2. Distribution and time-frequency features of ictal *H* patterns in SOZ**

557 **and PZ.** (A) Proportions of channels expressing the ictal *H* pattern, the ictal dominant  
558 *H* pattern, and the ictal non-dominant *H* pattern between SOZ (red dots) and PZ  
559 (orange dots) in 65 patients who had both SOZ and PZ. (B-F) Onset and end time,

560 fundamental frequency, maximal frequency, frequency interval, and number of  
561 spectral bands of the ictal *H* pattern between SOZ and PZ in 37 patients that  
562 simultaneously expressed the ictal *H* pattern in both SOZ and PZ.  
563 \*\*\*\*:  $p < 0.0001$ , nonparametric Mann-Whitney U test; *H* pattern, *Harmonic* pattern;  
564 SOZ, seizure-onset zone; PZ, early propagation zone.

565

566 **Figure 3. Associations between proportions of removal, time-frequency features**

567 **of the ictal *H* patterns, and seizure outcomes.** (A) Violin diagrams comparing  
568 removed ratios in channels of SOZ, channels expressing the ictal *H* pattern, channels  
569 expressing the ictal dominant *H* pattern, and channels expressing the ictal  
570 non-dominant *H* pattern between seizure-free (blue hollow circles) and not  
571 seizure-free (red hollow triangles) patients. (B-E) Onset time, end time, fundamental  
572 frequency, maximal frequency, frequency interval, and the number of spectral bands  
573 of the ictal *H* pattern between seizure-free (blue dots) and not seizure-free (red dots)  
574 patients. *H* pattern, *Harmonic* pattern; SOZ, seizure-onset zone.

575

576 **Figure 4. Binary regression for classification of seizure outcomes.** Seven variables

577 were recruited into the equation: EEG pattern harboring the *H* pattern, lesional MRI  
578 findings, seizure localization (mesial temporal lobe or neocortex), pathological  
579 findings, removed ratios of channels of the seizure-onset zone, channels expressing  
580 the ictal *H* pattern, and channels expressing the ictal dominant *H* pattern. The forest  
581 plot shows complete removal of channels expressing the ictal dominant *H* pattern,  
582 FCD type-II, or other MCD types (compared to gliosis/other non-specific pathology).  
583 Less implanted electrodes were correlated with seizure freedom. EEG,  
584 electroencephalography; *H* pattern, *Harmonic* pattern; MRI, magnetic resonance  
585 imaging; FCD, focal cortical dysplasia; MCD, malformation of cortical development;  
586 OR, odds ratio; CI, confidence interval.

587

588 **Figure 5. Predictive values for seizure outcomes.** (A-D) Four-fold tables and  
589 receiver operator characteristic curve (ROC) for the removed ratios of channels within

590 the seizure-onset zone (dark red), channels expressing the ictal *H* pattern (orange),  
591 channels expressing the ictal dominant *H* pattern (scarlet), and channels expressing the  
592 ictal non-dominant *H* pattern (yellow) as predictors of post-surgical outcomes. In the  
593 four-fold tables, the numbers of seizure-free patients and not seizure-free patients with  
594 all the corresponding channels removed ('Yes', upper left of the table), or  
595 incompletely/none removed ('No', bottom left of the table) are listed. *p*-values for each  
596 *Chi-Squared* test are provided above each table. In the ROC curves, each colored dot  
597 represents a combined value of the false positive rate (X-axis) and the true positive  
598 rate (Y-axis). The areas under curves (AUCs) are respectively listed on the bottom  
599 right corner.

600

601 **Figure 6. Survival analysis.** Kaplan-Meier (KM) plots of cumulative probability of  
602 continuous seizure freedom separated by complete (100%) removal (green continuous  
603 line) and incomplete/none (0~100%) removal (blue continuous line) of the whole  
604 cohort, channels of seizure-onset zone, channels expressing the ictal *H* pattern,  
605 channels expressing the ictal dominant *H* pattern, and channels expressing the ictal  
606 non-dominant *H* pattern. The 'number at risk (number censored)' of each year is  
607 annotated below the KM plot for every category.

Table 1. Patients' demographics and surgical outcome

|                                 | Total cohort       | Seizure-free<br>(Engel class Ia) | Non-seizure free<br>(> Engel class Ia) | <i>p</i> value           |
|---------------------------------|--------------------|----------------------------------|----------------------------------------|--------------------------|
| Number of patients, n           | 85                 | 52                               | 33                                     | -                        |
| Gender, M, n (%)                | 47 (55.3%)         | 29 (55.8%)                       | 18 (54.5%)                             | 0.912 <sup>a</sup>       |
| Age at onset, y                 | 10.0 (6.0-15.4)    | 8.5 (5.8-18.8)                   | 12.0 (6.5-15.4)                        | 0.338 <sup>c</sup>       |
| Age at SEEG recording, y        | 23.3 ± 10.4        | 23.0 ± 11.1                      | 23.7 ± 9.4                             | 0.753 <sup>b</sup>       |
| EEG pattern at H pattern, n (%) |                    |                                  |                                        |                          |
| Irregular spiking (IS)          | 29 (34.1%)         | 17 (32.7%)                       | 12 (36.4%)                             | 0.728 <sup>a</sup>       |
| Fast activity (FA)              | 56 (65.9%)         | 35 (67.3%)                       | 21 (63.6%)                             |                          |
| Lateralization, n (%)           |                    |                                  |                                        |                          |
| Left                            | 36 (42.4%)         | 21 (40.4%)                       | 18 (54.5%)                             | 0.645 <sup>a</sup>       |
| Right                           | 49 (57.6%)         | 31 (59.6%)                       | 15 (45.5%)                             |                          |
| Localization, n (%)             |                    |                                  |                                        |                          |
| Mesial temporal lobe            | 28 (32.9%)         | 15 (28.8%)                       | 13 (39.4%)                             | 0.313 <sup>a</sup>       |
| Neocortex                       | 57 (67.1%)         | 37 (71.2%)                       | 20 (60.6%)                             |                          |
| Lesional MRI, n (%)             | 63 (74.1%)         | 39 (75.0%)                       | 24 (72.7%)                             | 0.816 <sup>a</sup>       |
| Number of Electrodes, n         | 10.0 (8.0-11.5)    | 9.0 (7.0-11.0)                   | 10.0 (9.0-12.5)                        | <b>0.025<sup>c</sup></b> |
| Number of Contacts, n           | 112.0 (88.5-127.0) | 112.5 (81.3-127.8)               | 112.0 (96.0-126.5)                     | 0.433 <sup>c</sup>       |
| Bilateral implantation, n (%)   | 27 (31.8%)         | 16 (30.8%)                       | 11 (33.3%)                             | 0.874 <sup>a</sup>       |
| Pathology, n (%)                | 82                 | 52                               | 30                                     |                          |
| Hippocampal sclerosis           | 13 (15.9%)         | 8 (15.4%)                        | 5 (16.7%)                              | <b>0.014<sup>d</sup></b> |
| FCD type-II                     | 28 (34.1%)         | 22 (42.3%) <sup>e</sup>          | 6 (20.0%) <sup>e</sup>                 |                          |
| Other MCD types                 | 16 (19.5%)         | 11 (21.2%)                       | 5 (16.7%)                              |                          |
| Tumor                           | 3 (3.7%)           | 3 (5.8%)                         | 0                                      |                          |
| Gliosis/other non-specific      | 22 (26.8%)         | 8 (15.4%) <sup>f</sup>           | 14 (46.7%) <sup>f</sup>                |                          |

Normal variables were presented as mean ± standard deviation (SD). Non-normal variables were reported as median (interquartile range, IQR). a. *Pearson's chi-square* test. b. *Unpaired t-test*. c. *Mann-Whitney U* test. d. *Fisher exact* test. e & f. *Bonferroni* correction: In the SF and NSF groups, there was a discrepancy in pathological finding ( $p = 0.014$ ). A significant difference was found between FCD type-II and gliosis/non-specific findings.

SEEG, stereo-electroencephalography, H pattern, Harmonic pattern, MRI, magnetic resonance imaging, FCD, focal cortical dysplasia, MCD, malformation of cortical development

Notion: The category *Other MCD types* consists of FCD type-I, tuberous sclerosis complex, heterotopia, and mild malformation of cortical development with oligodendroglial hyperplasia in epilepsy.



# Figure 1

**A** ● SOZ

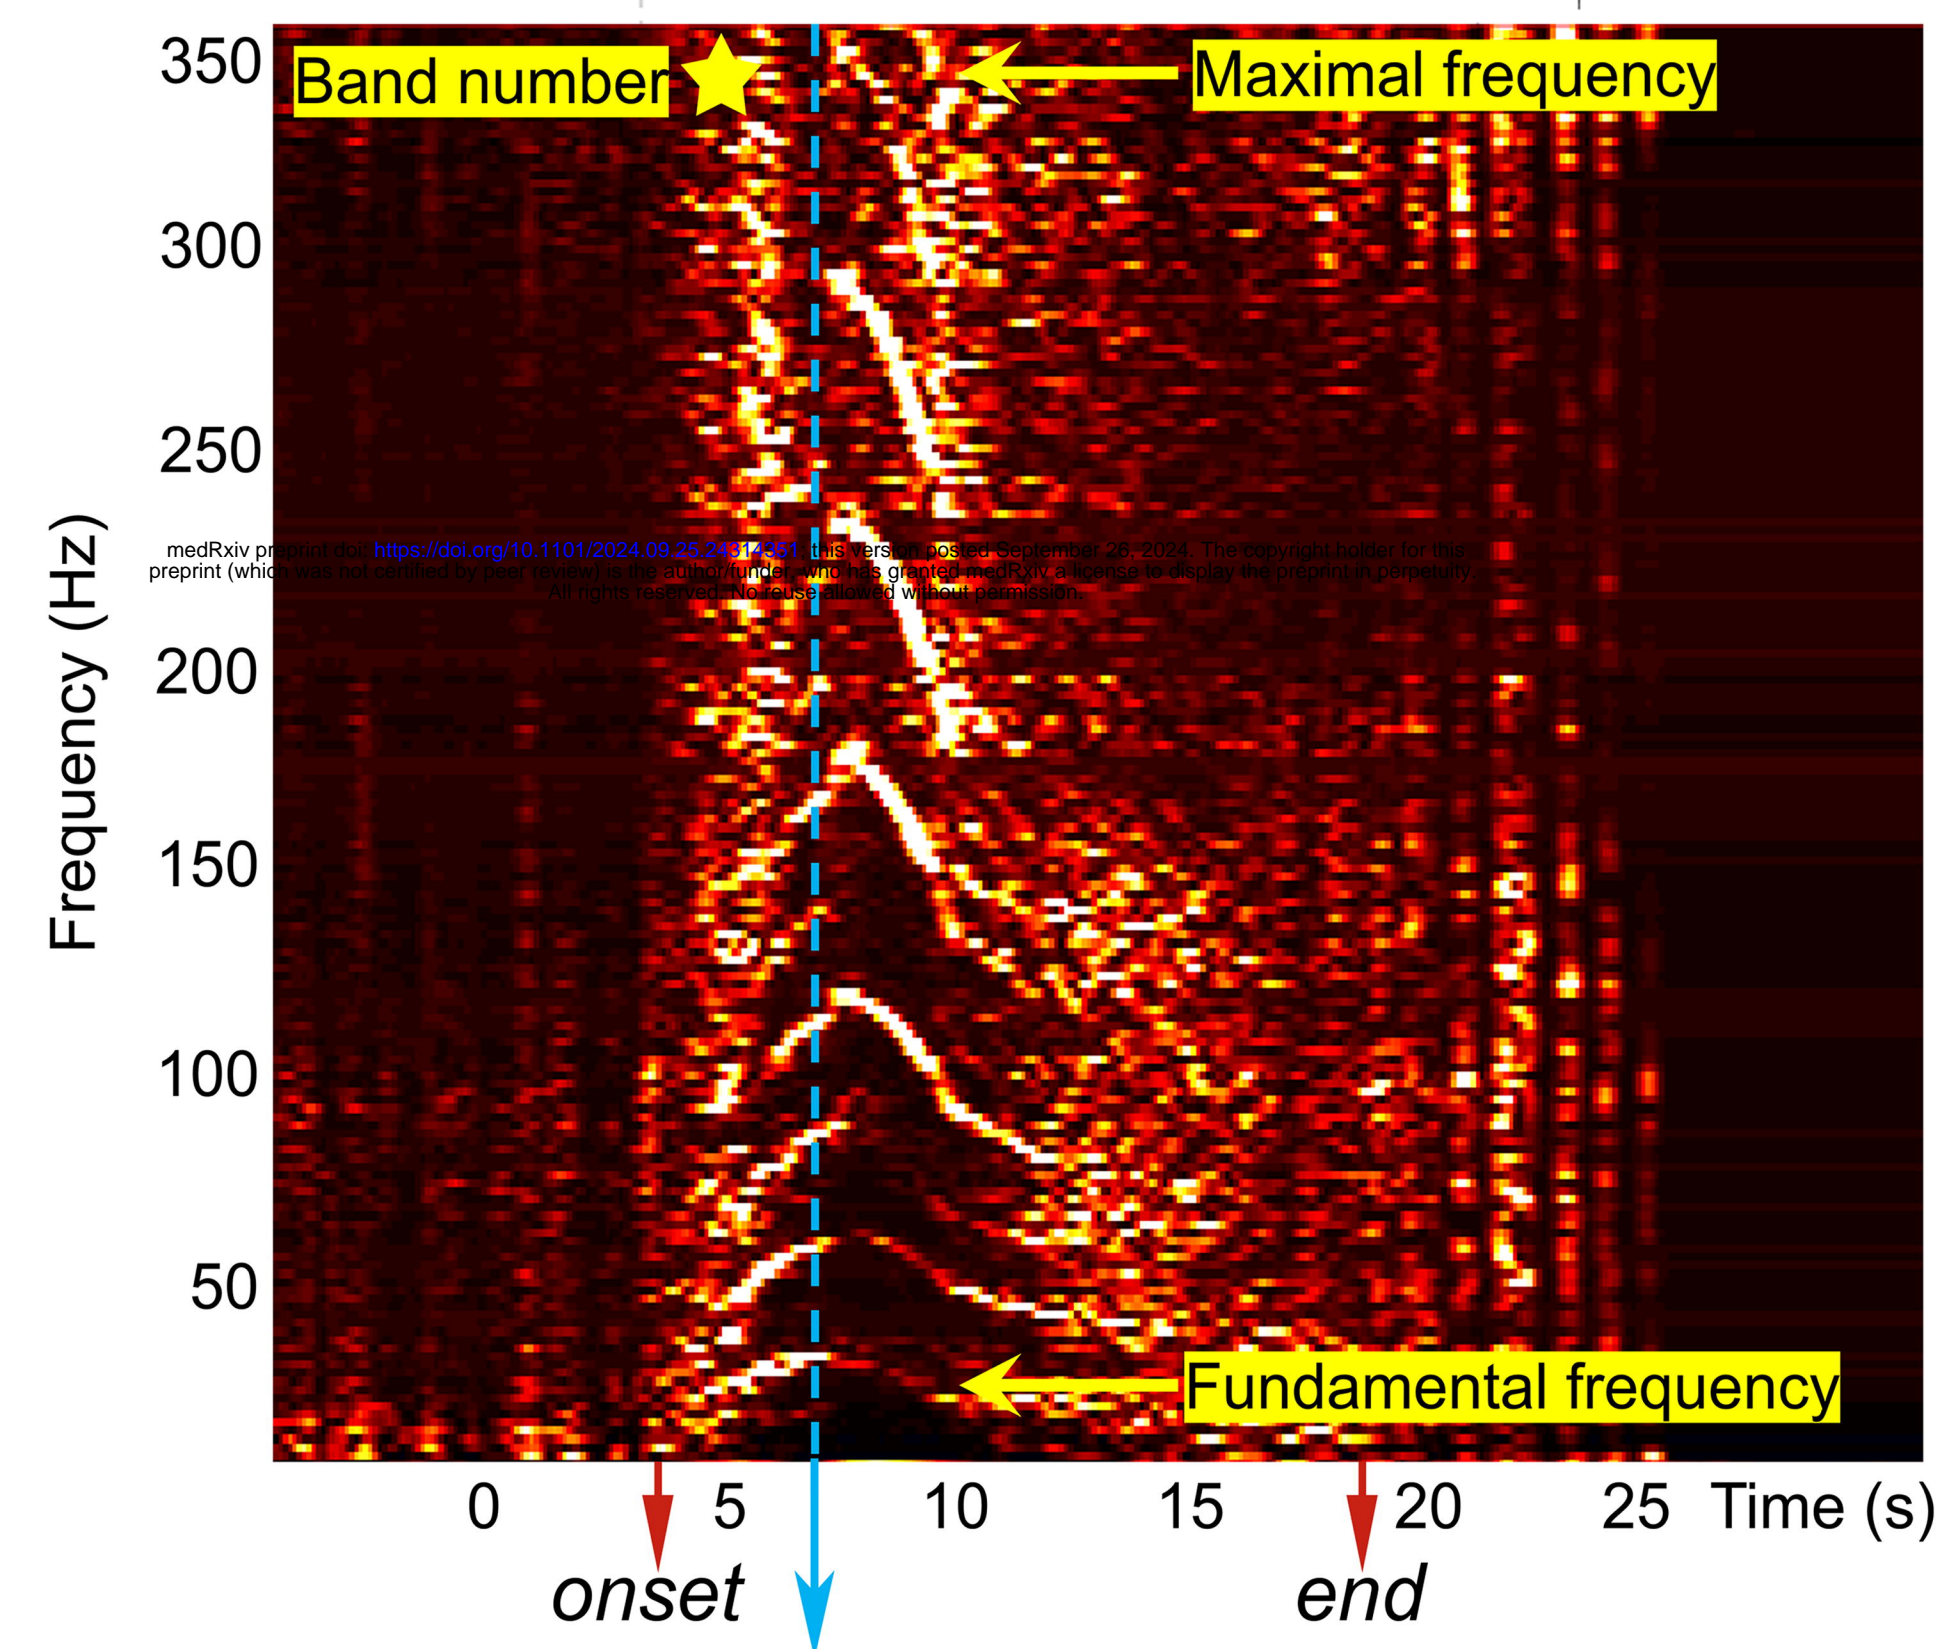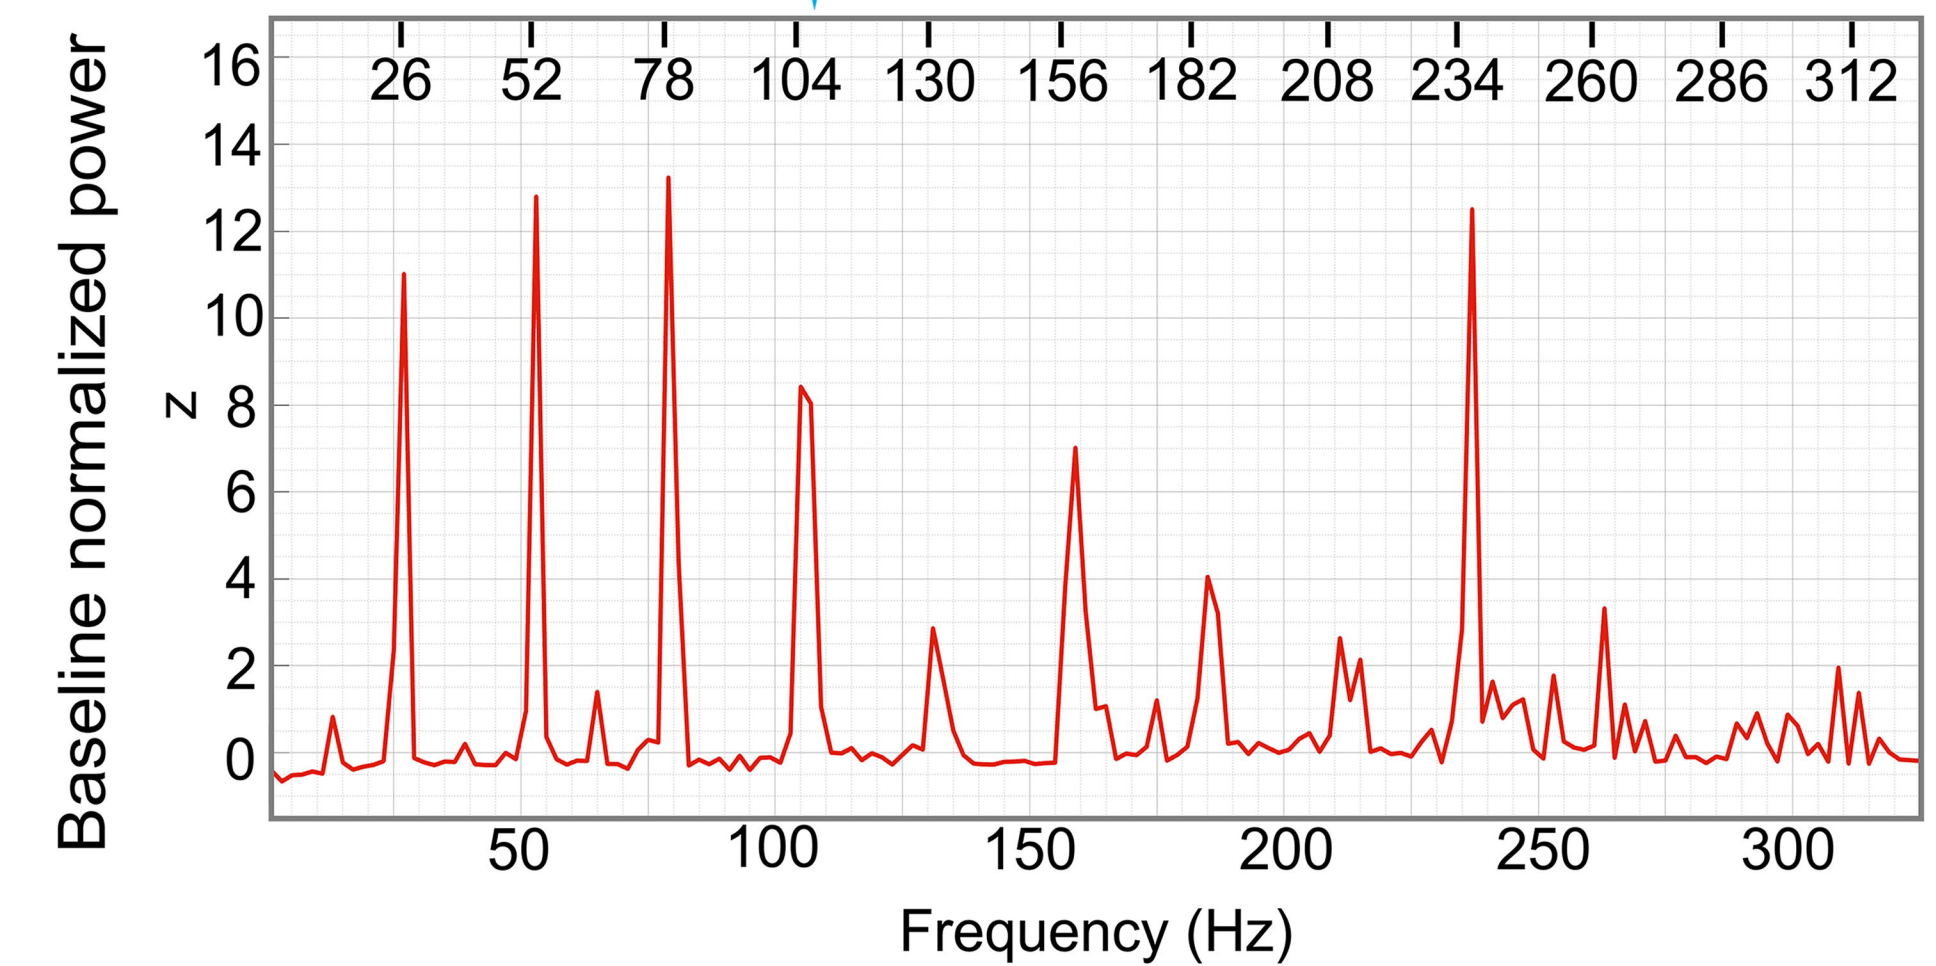

● PZ

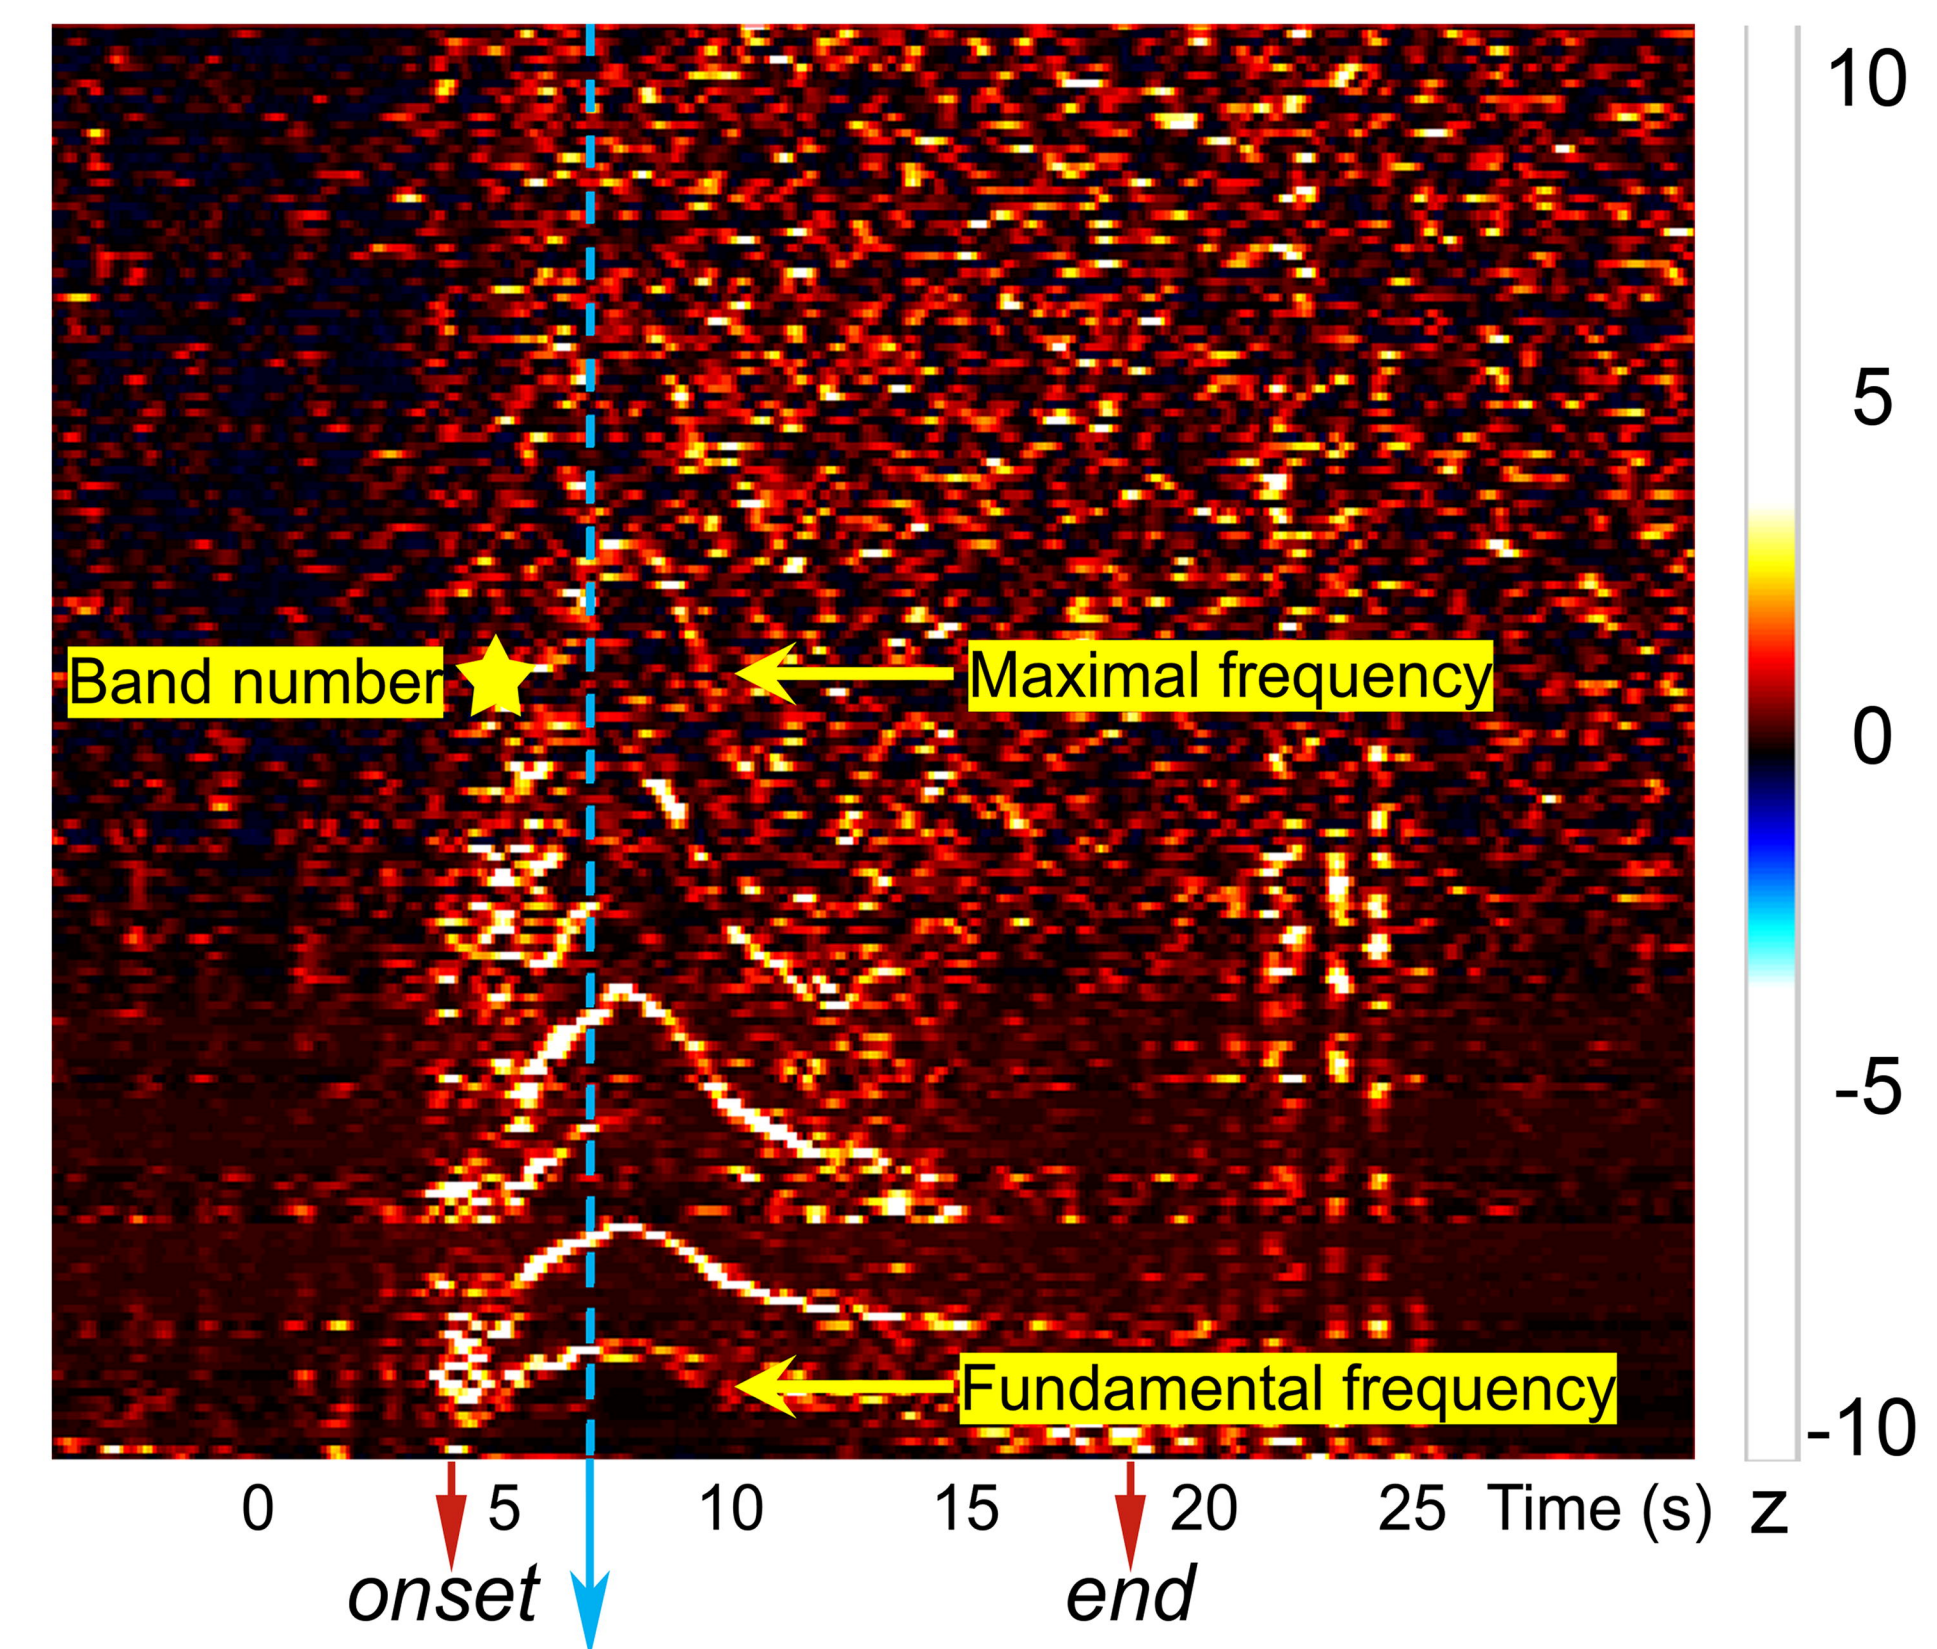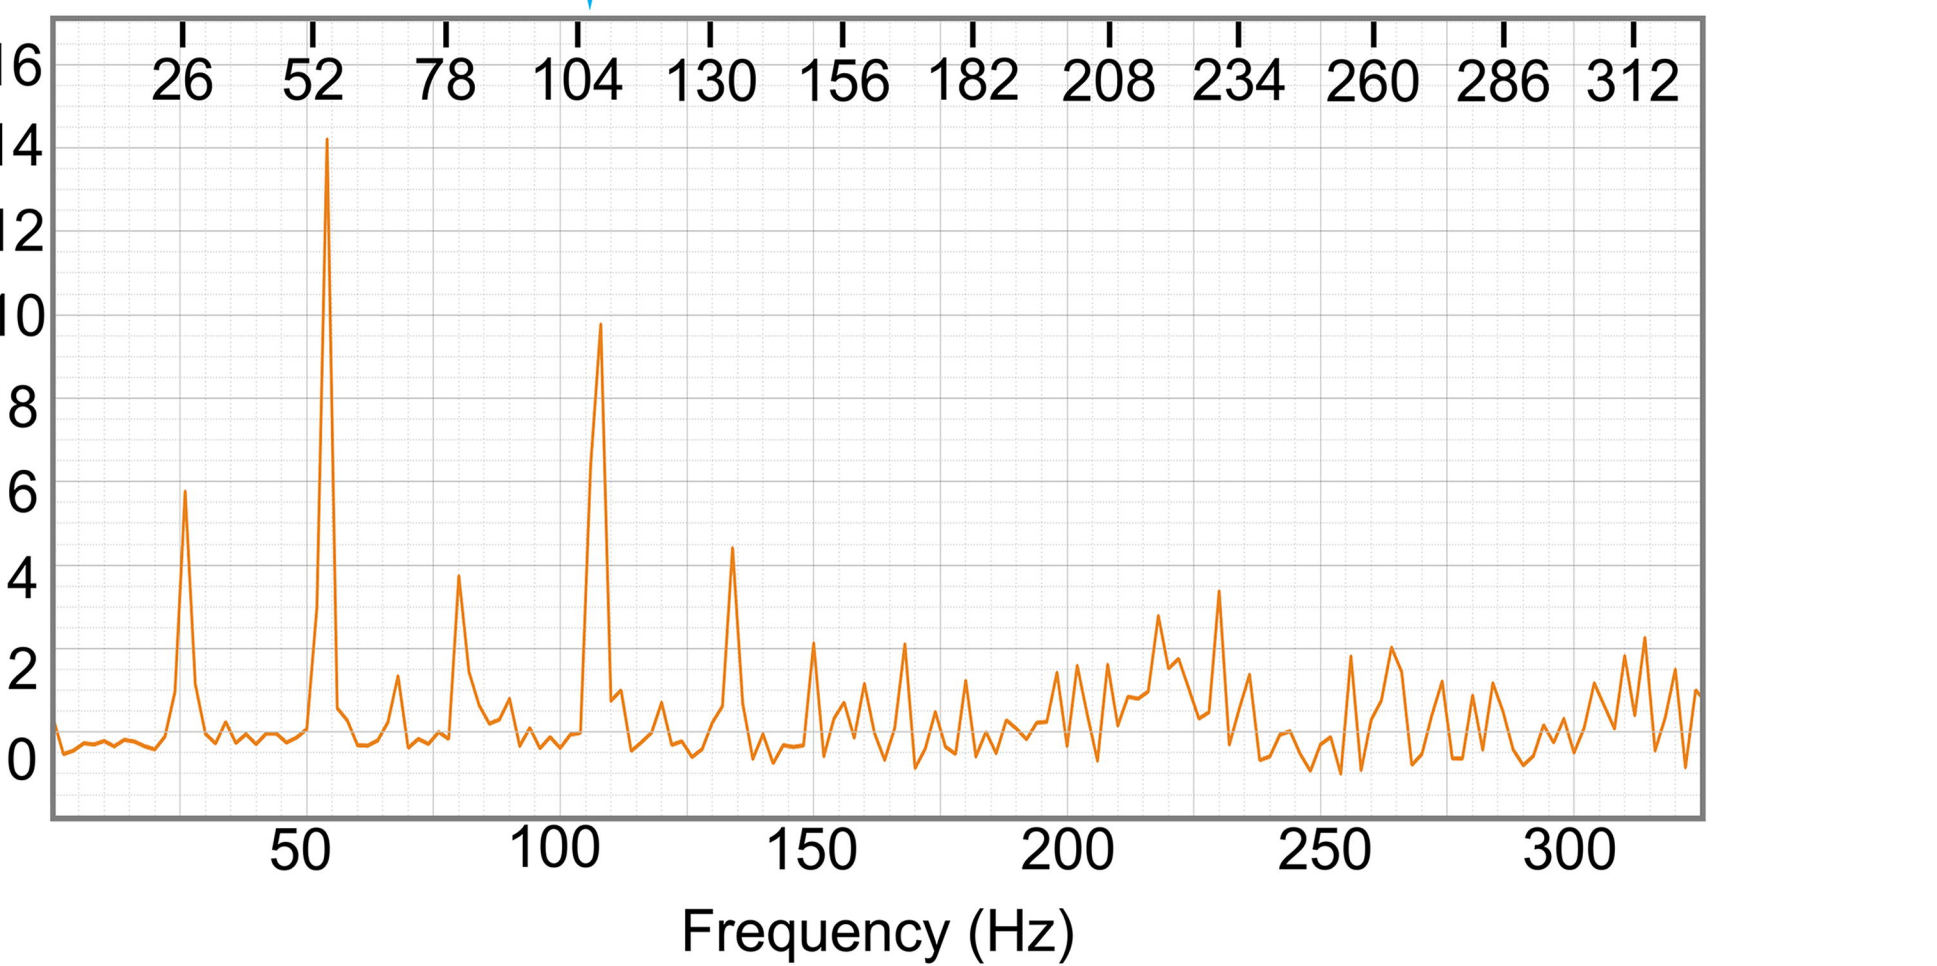

**B**

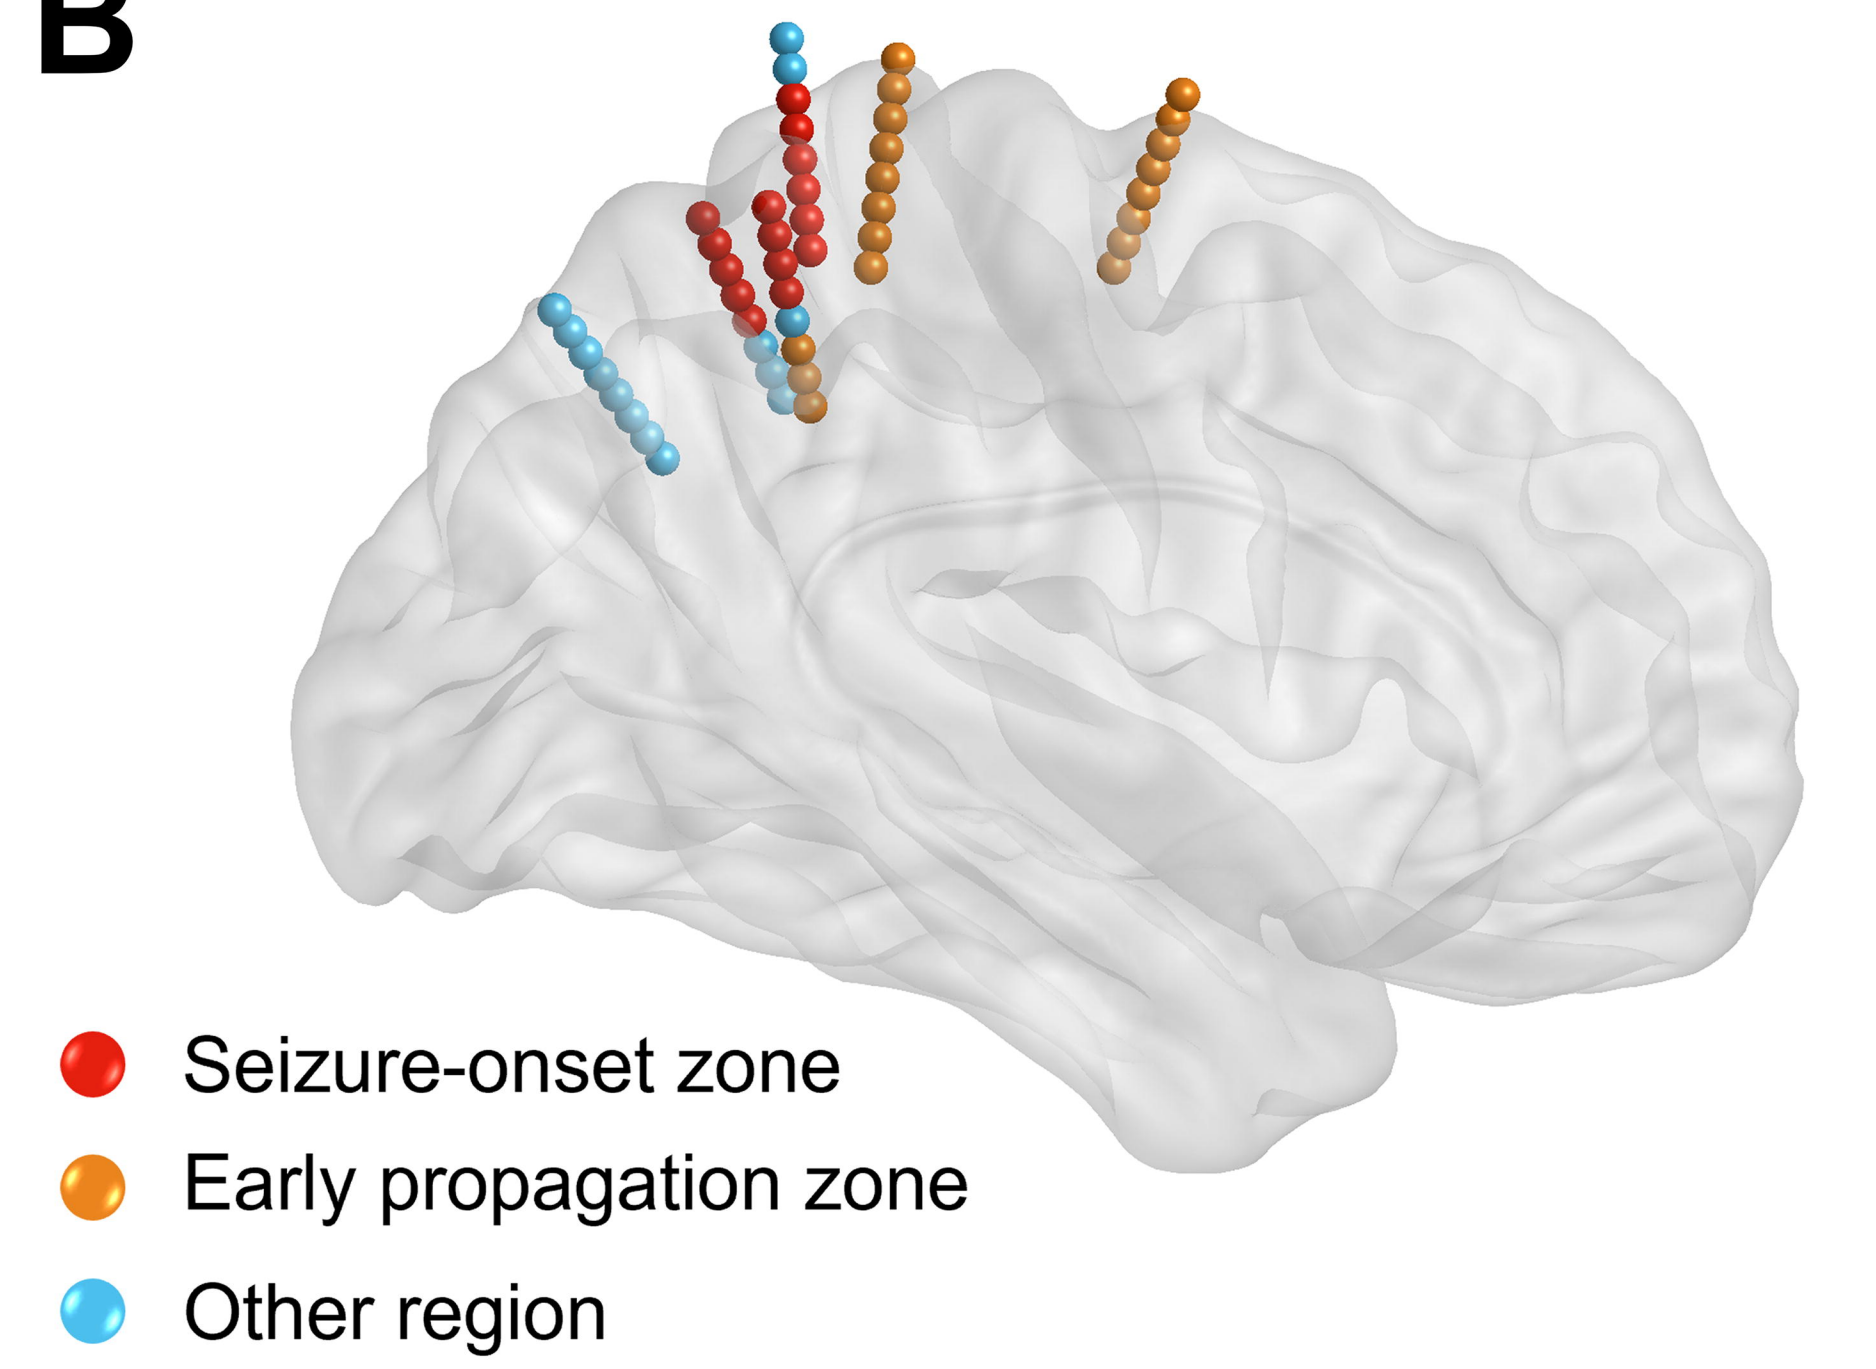

**C**

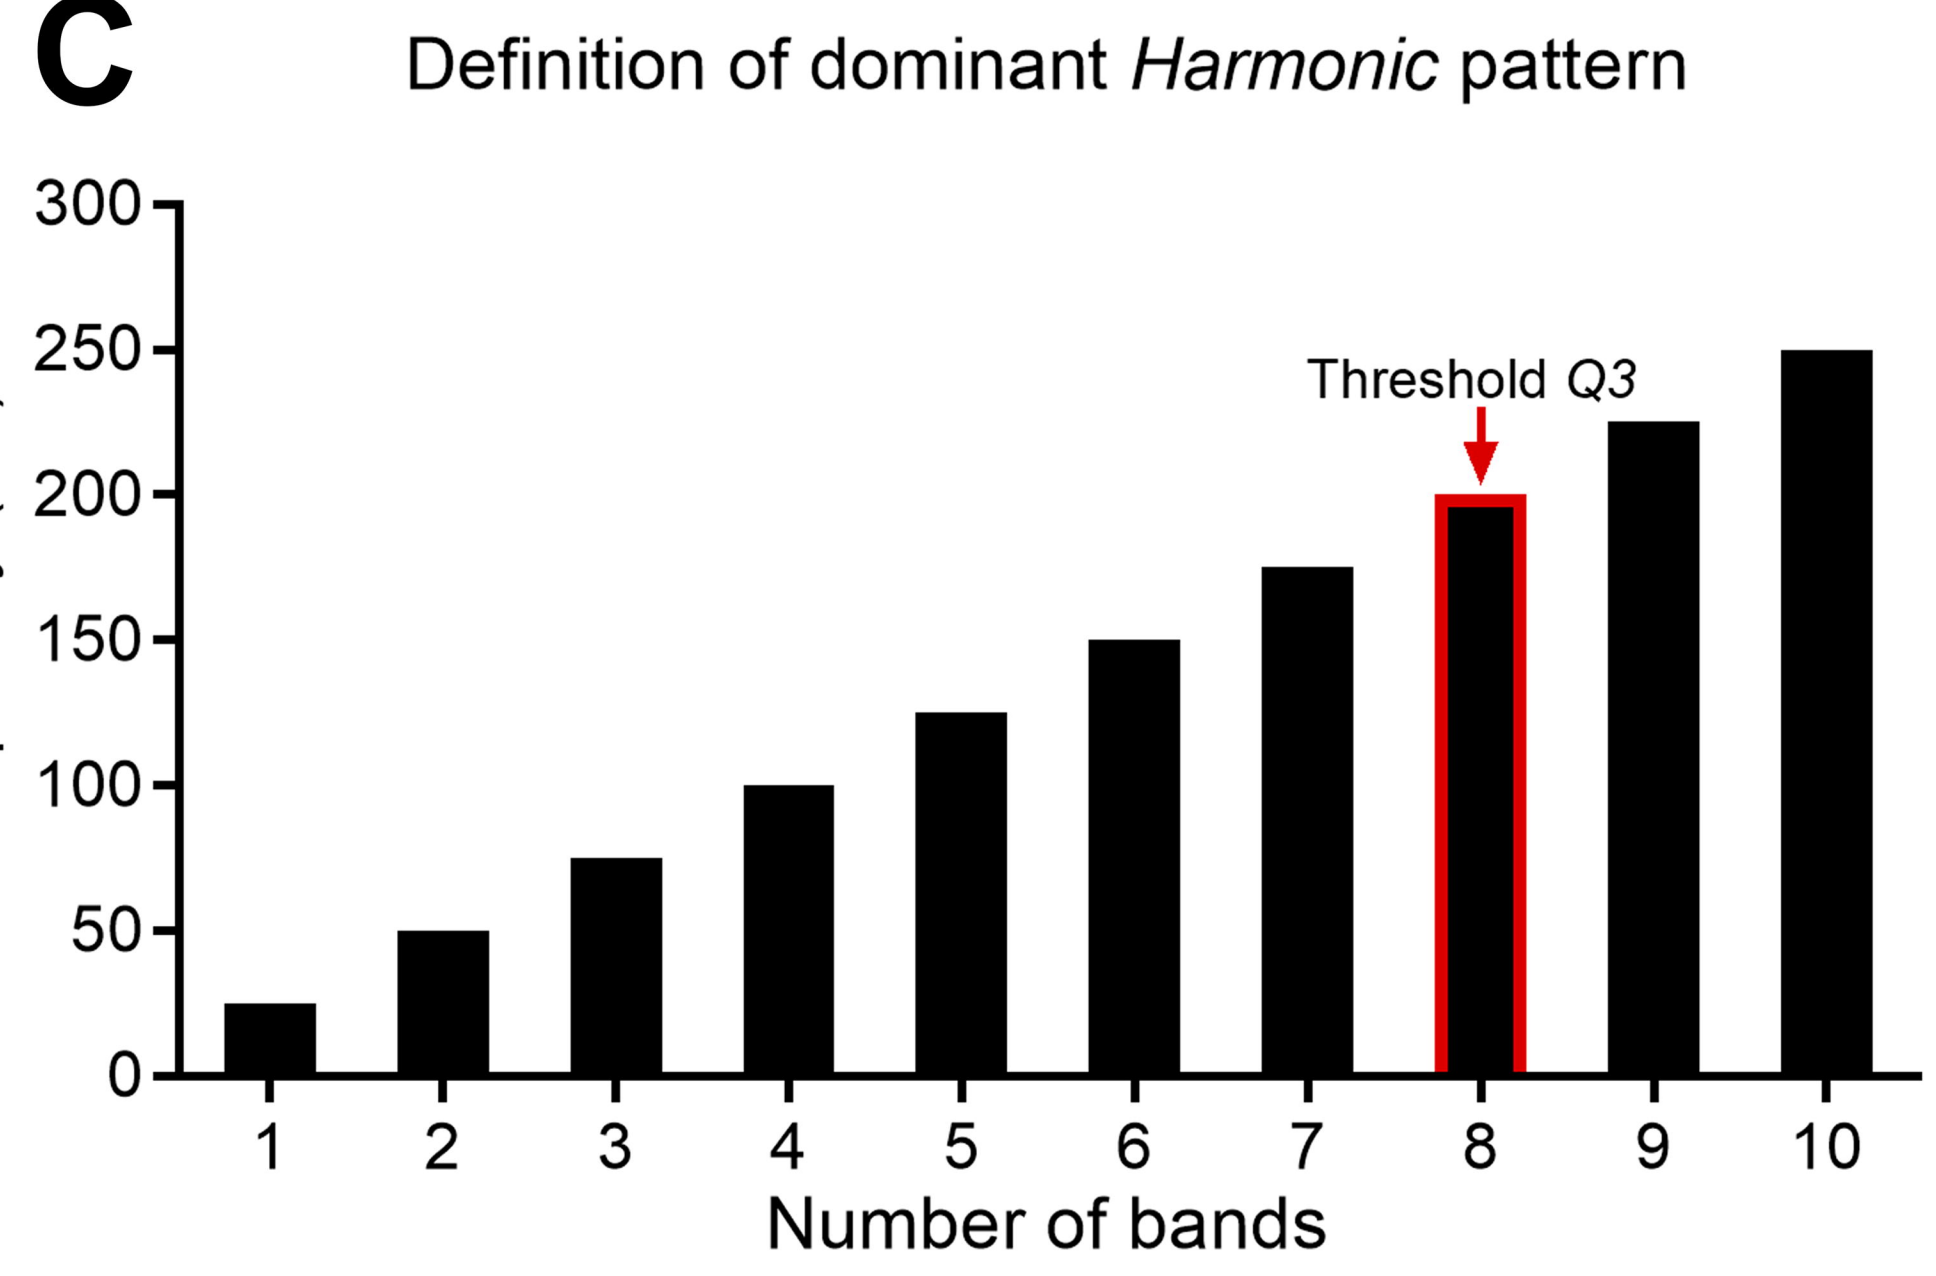

# Figure 2

SOZ

PZ

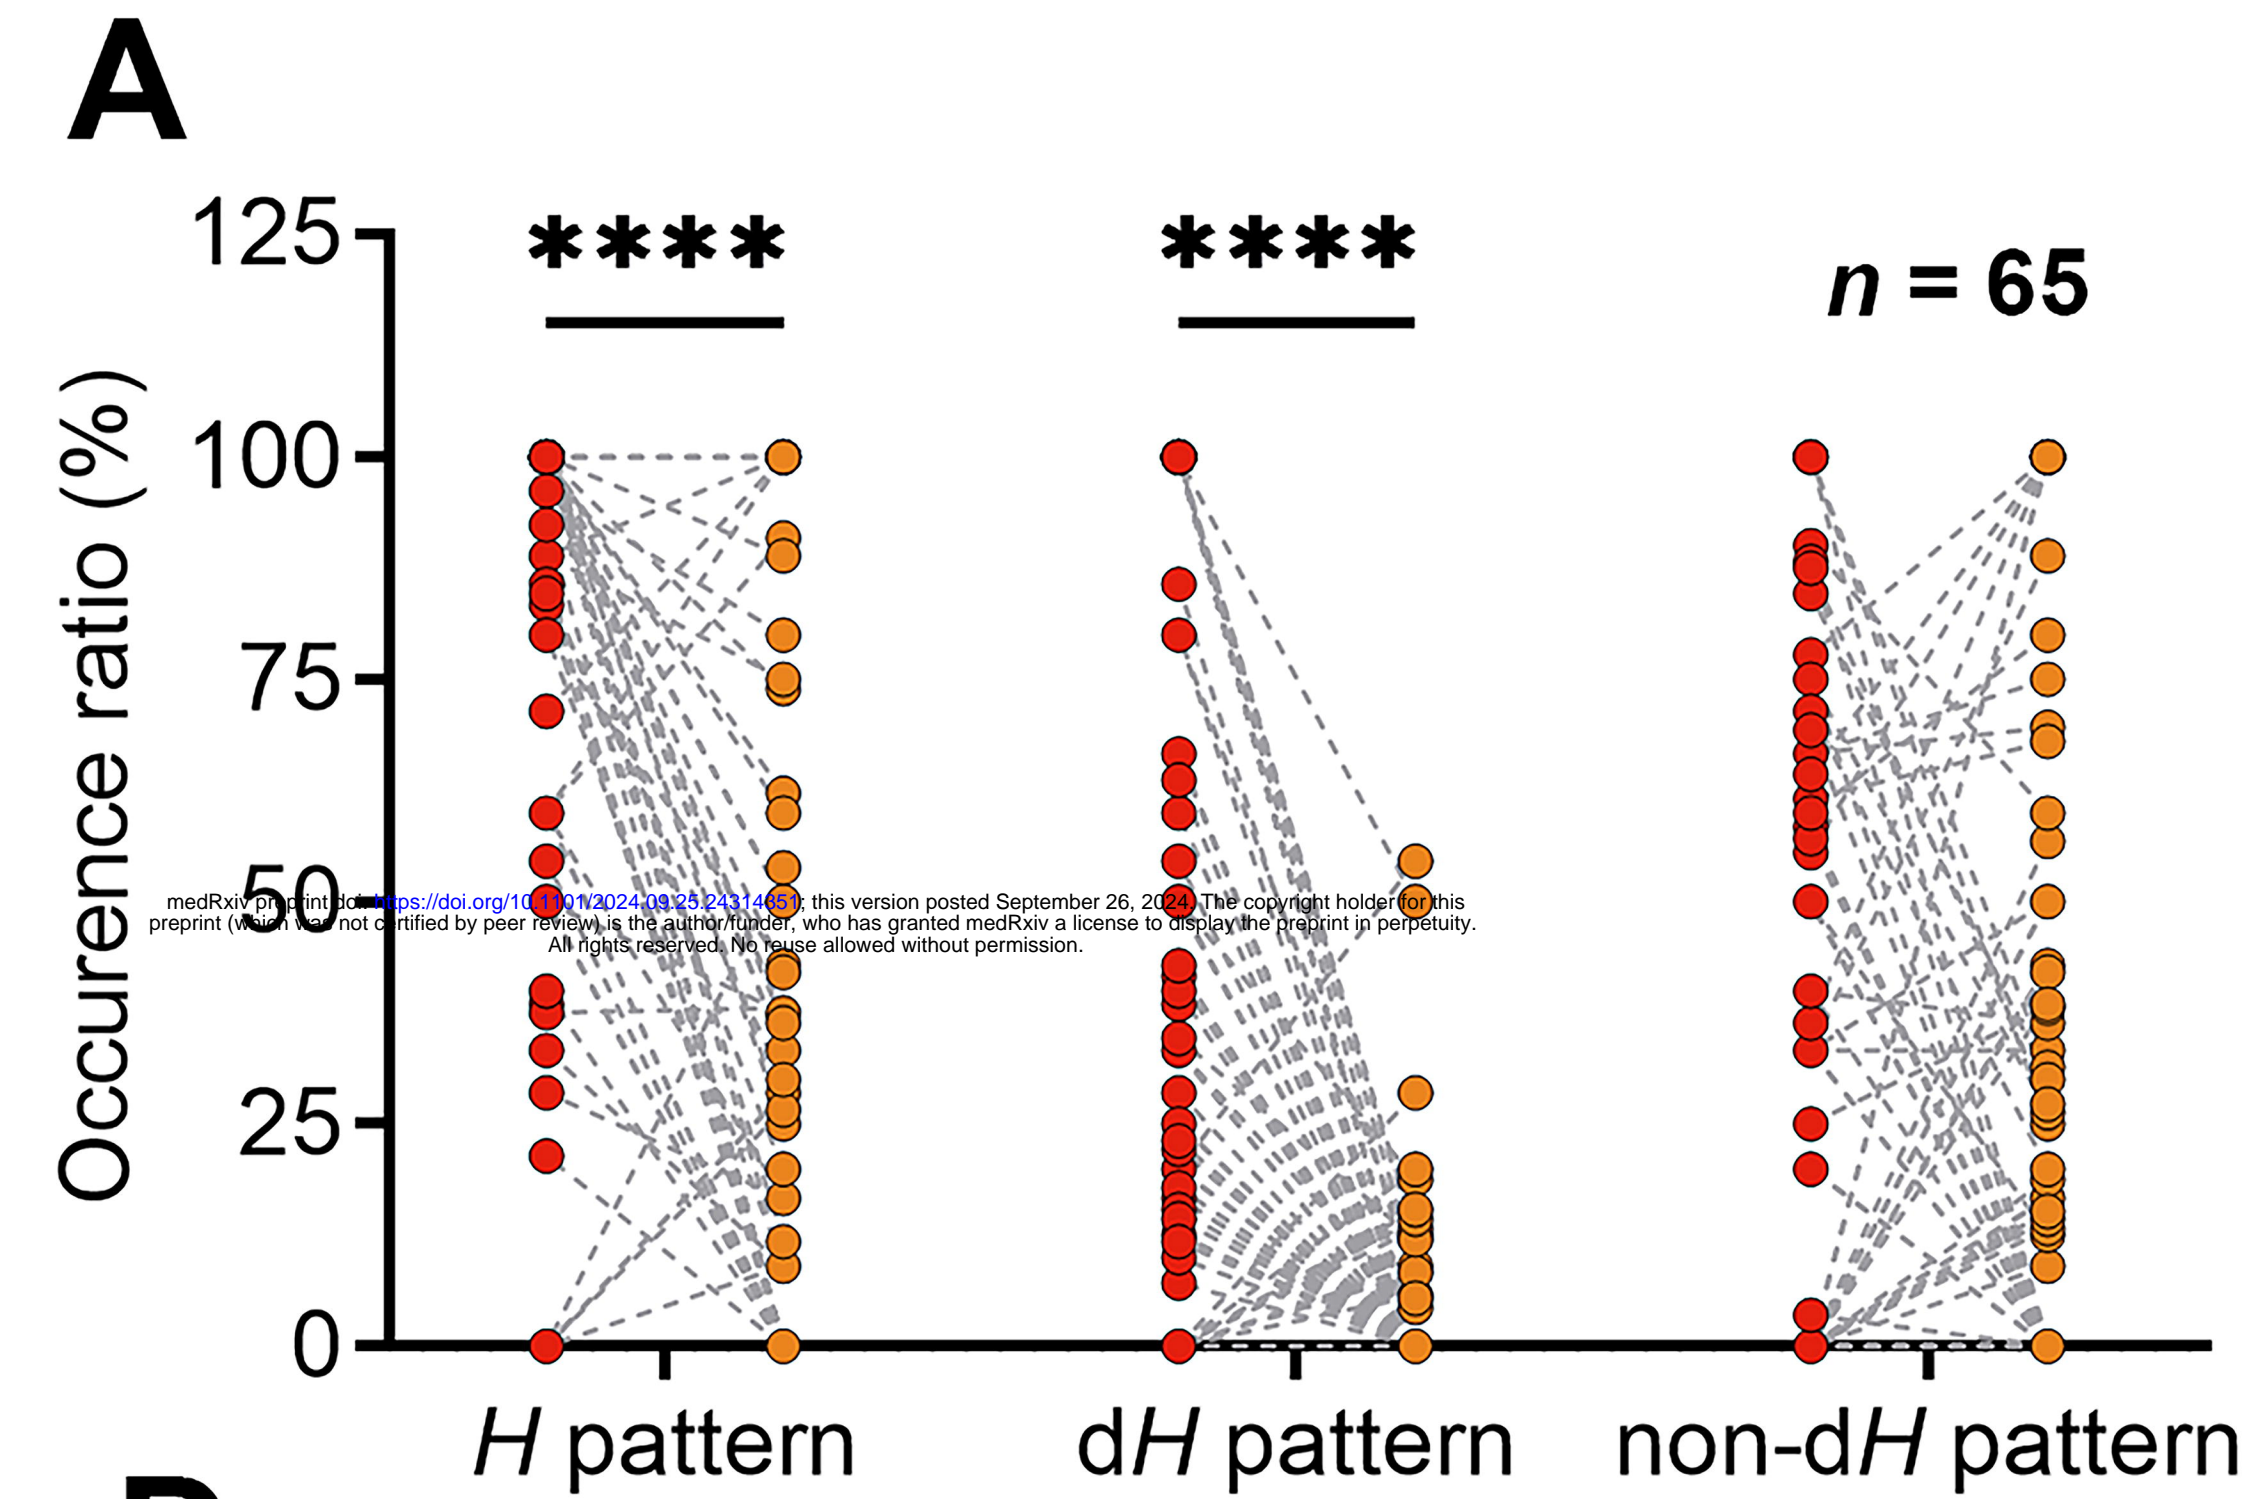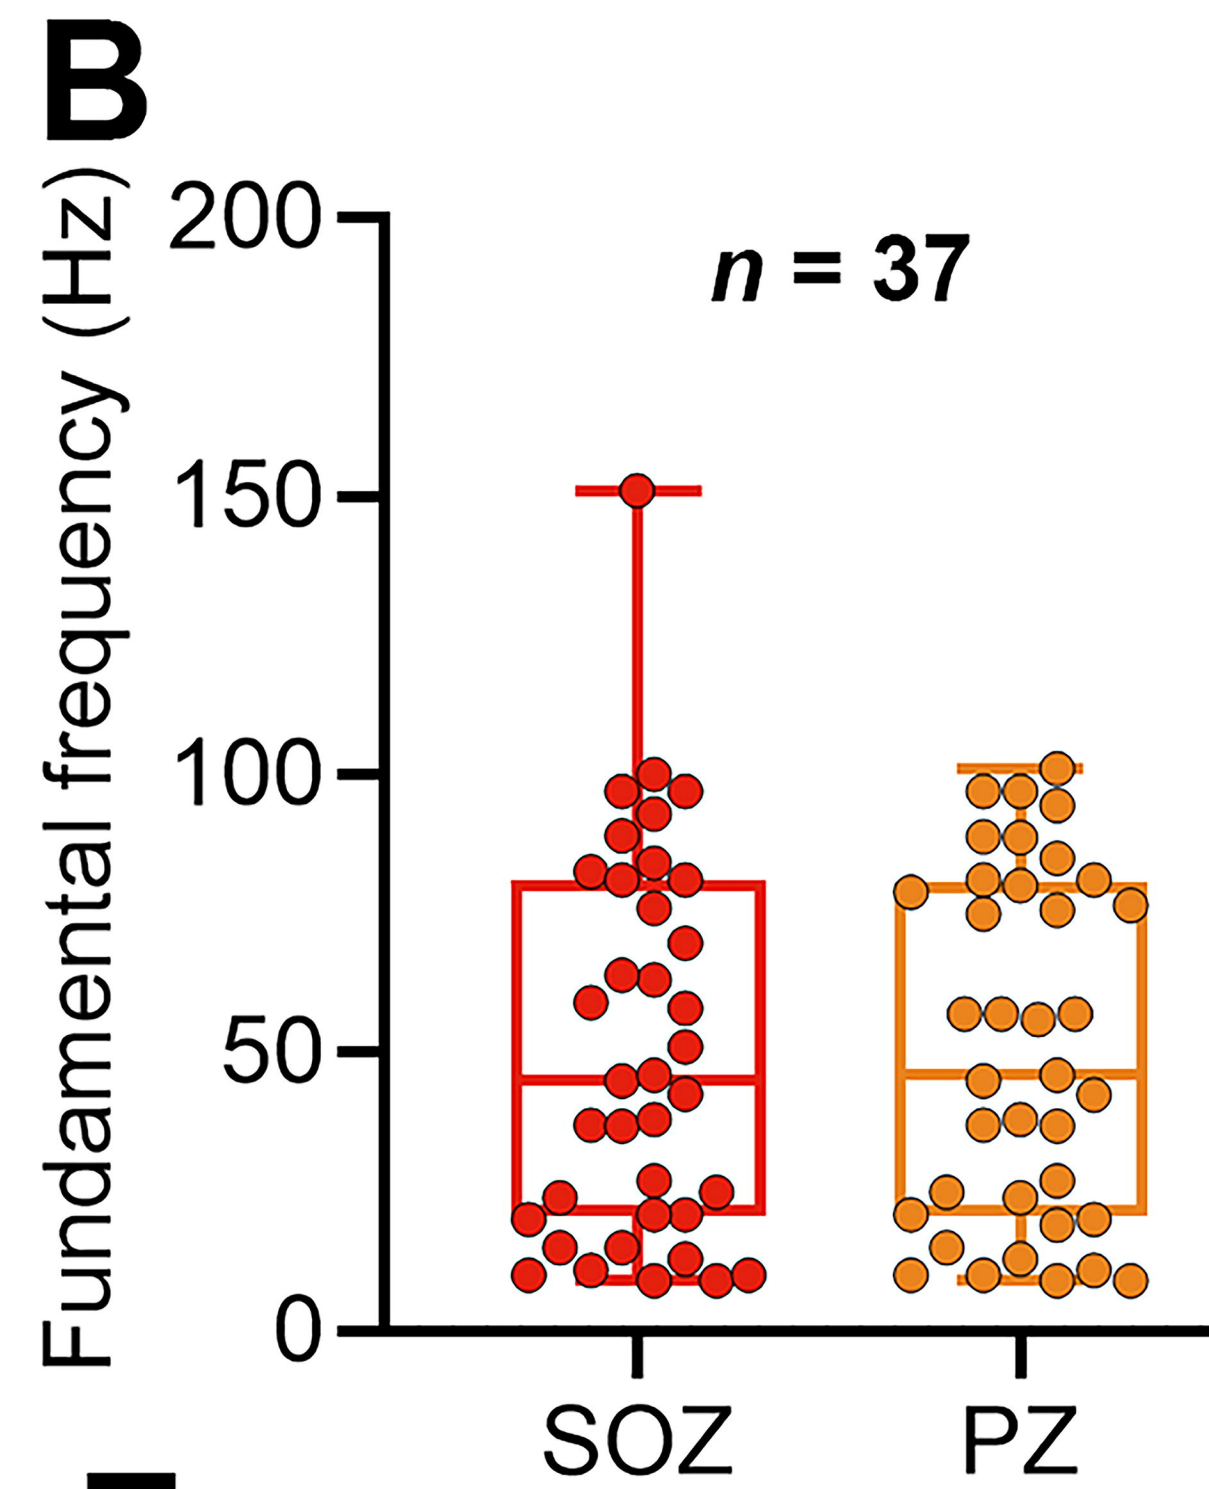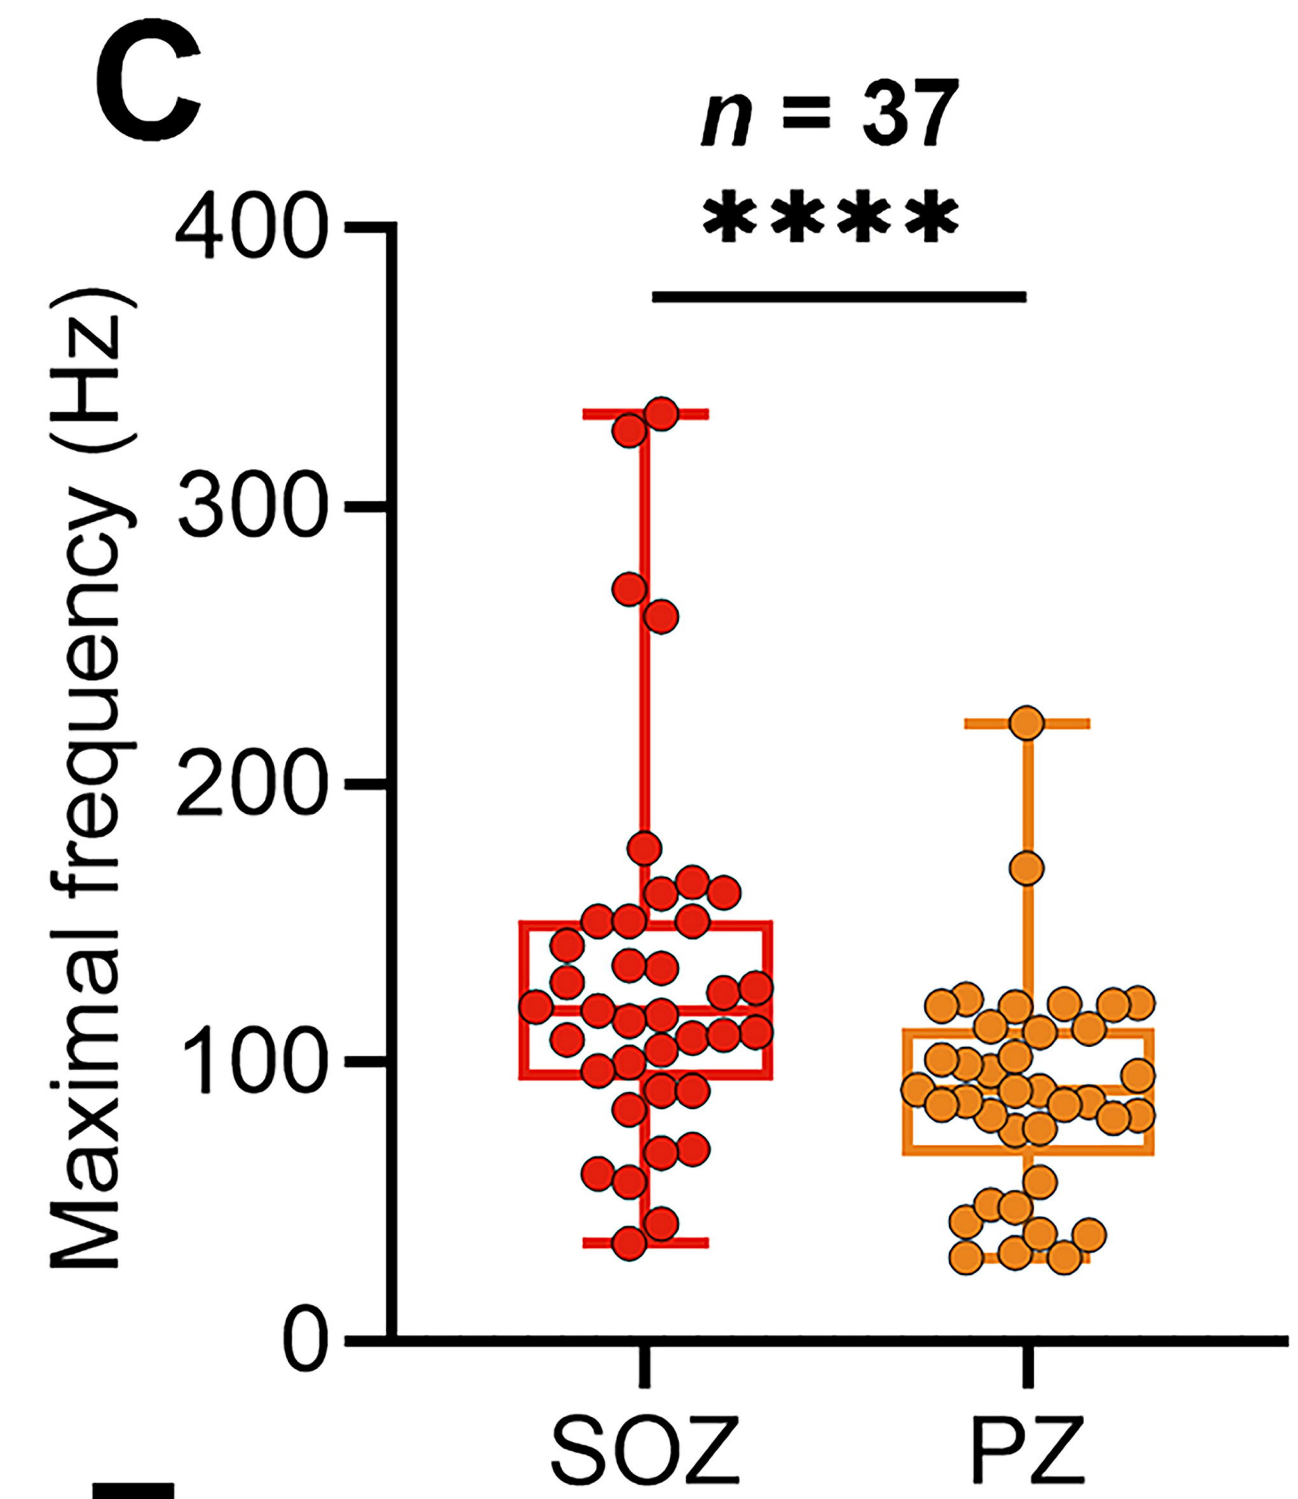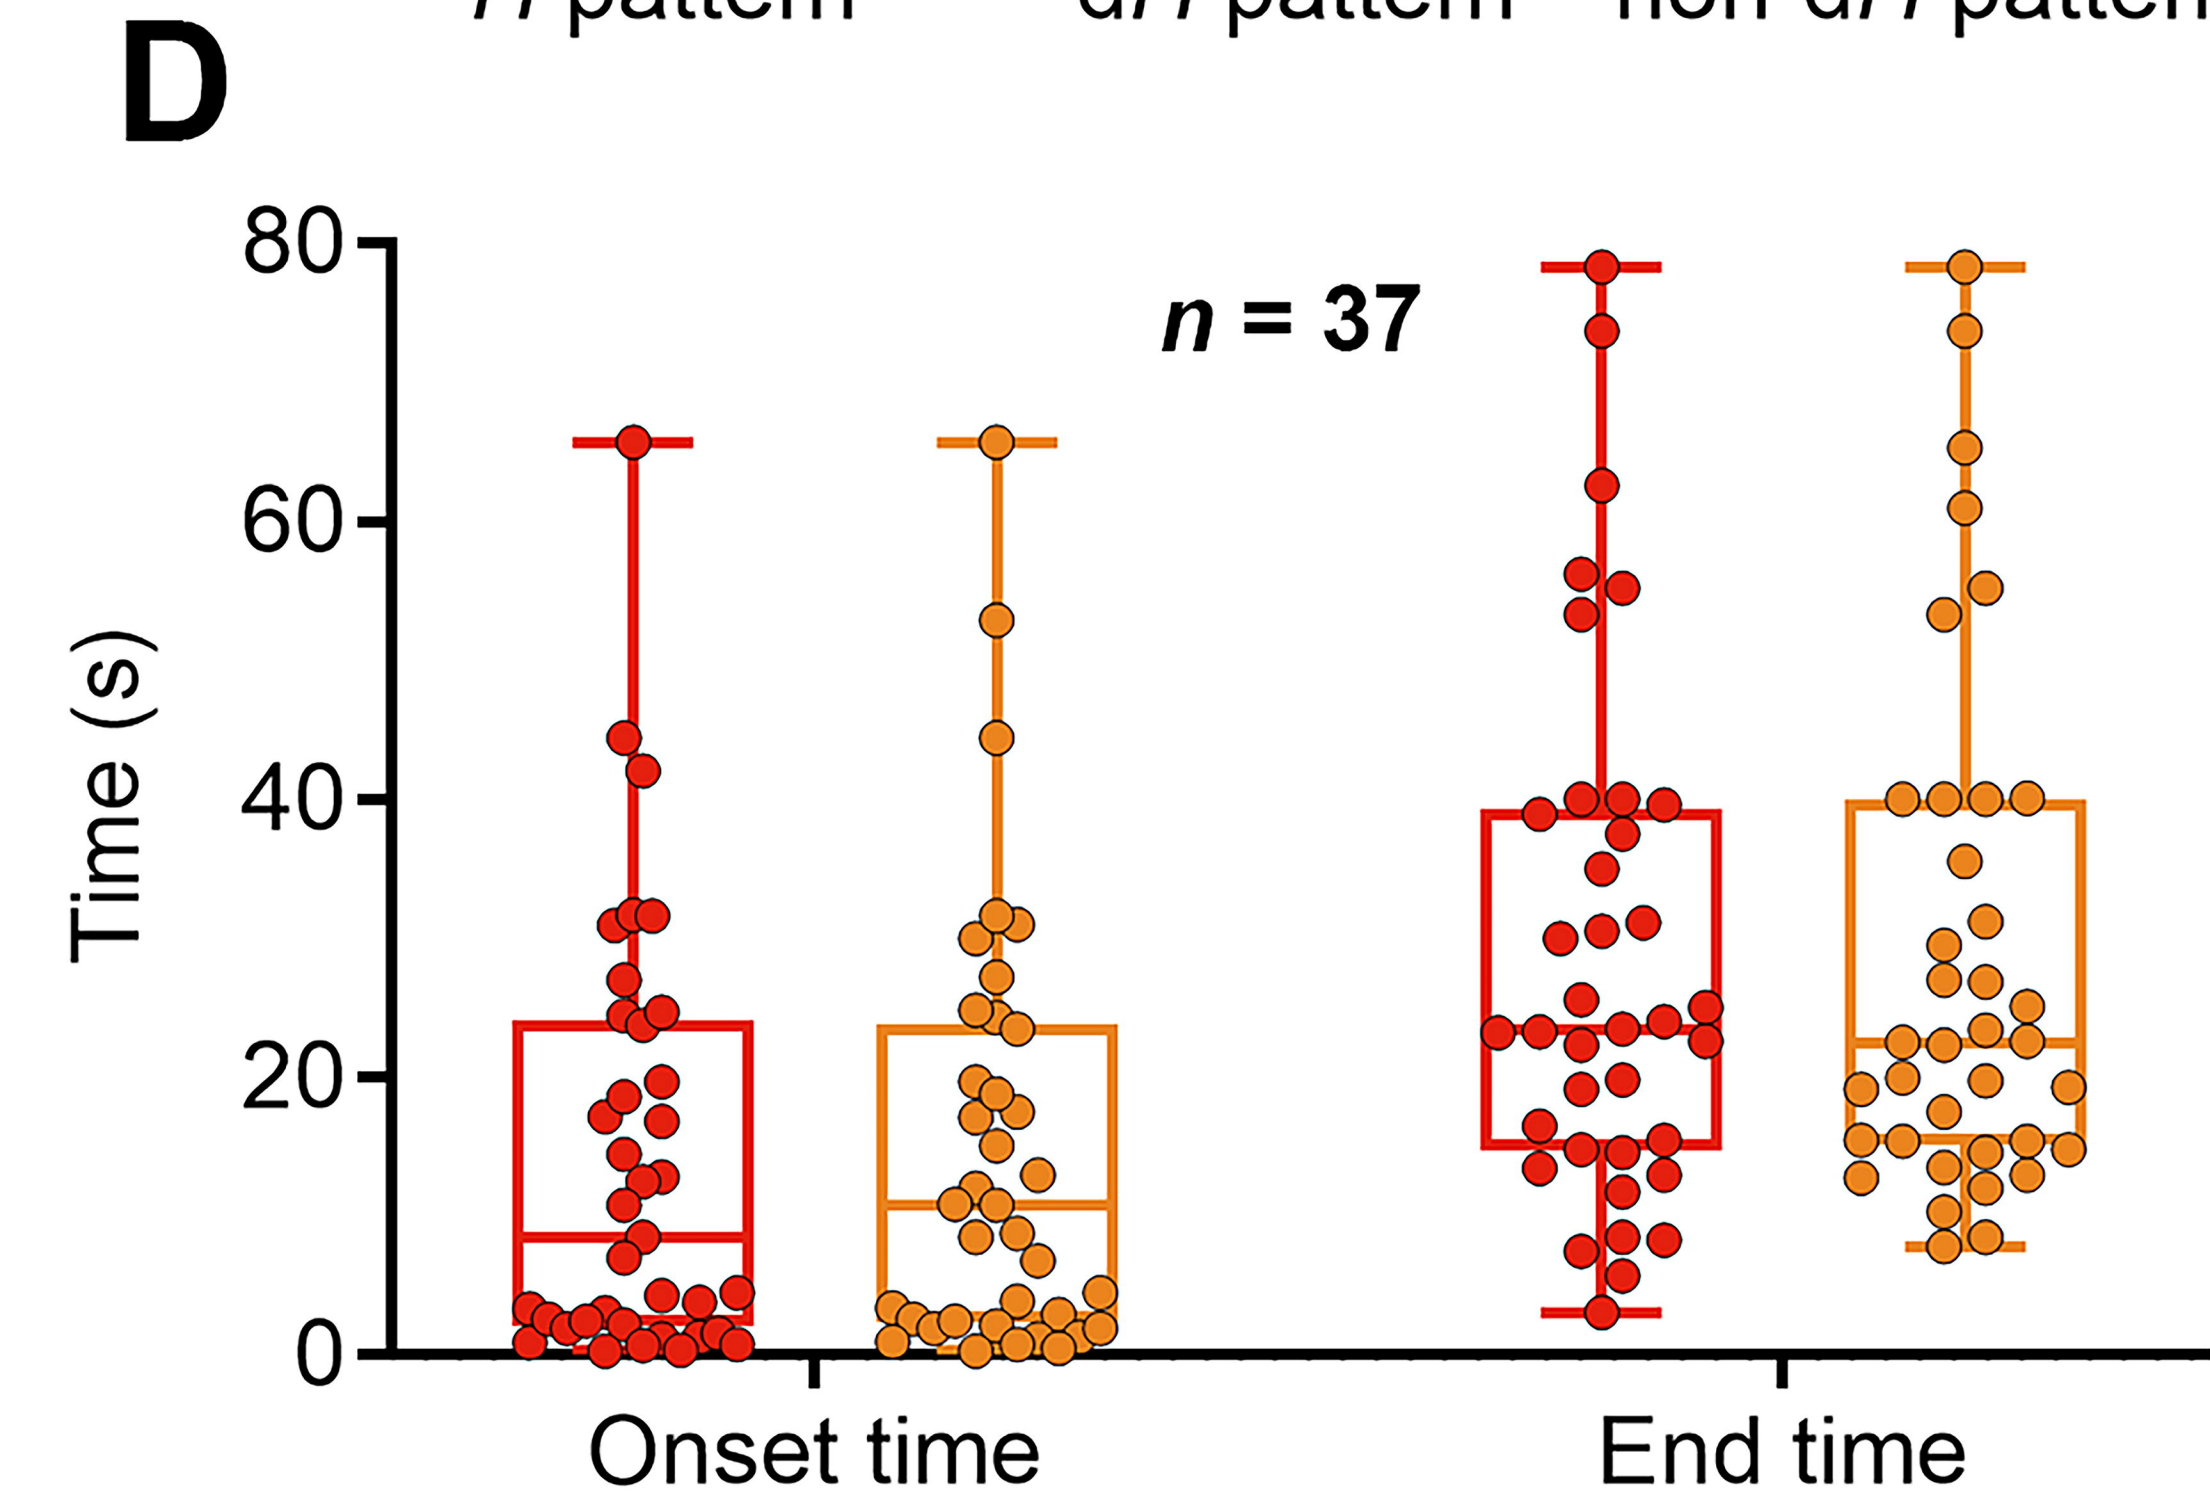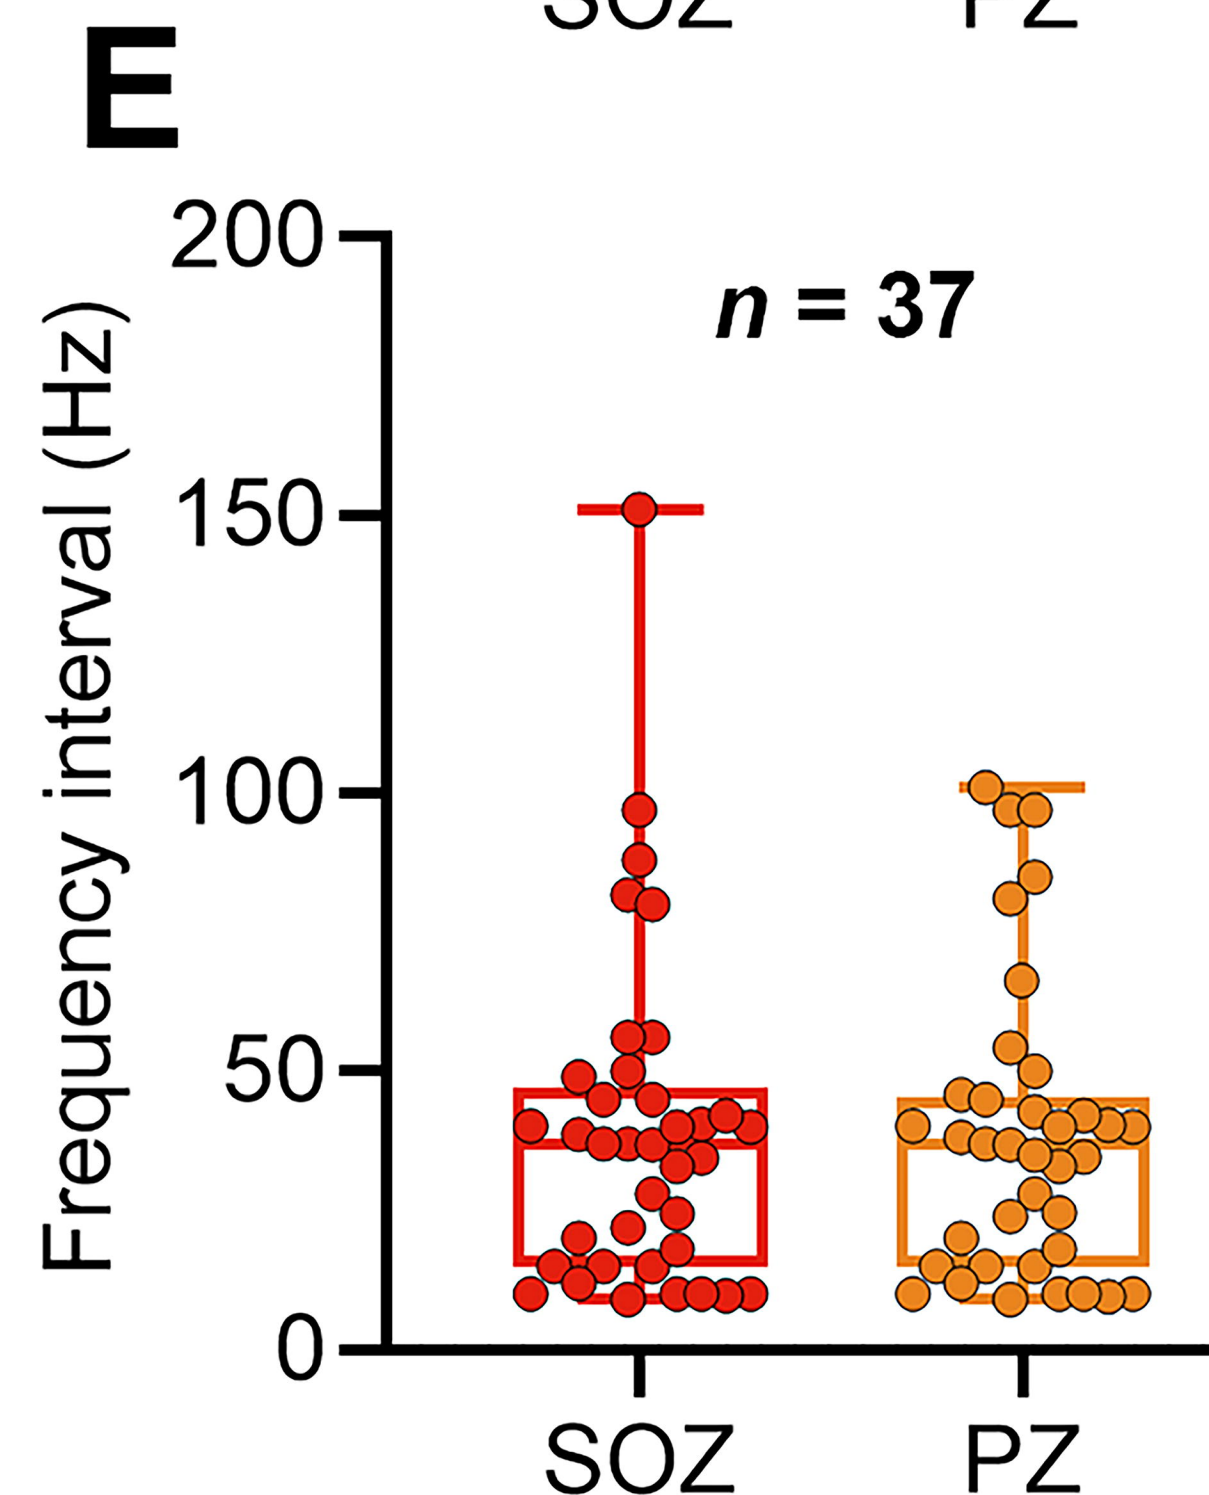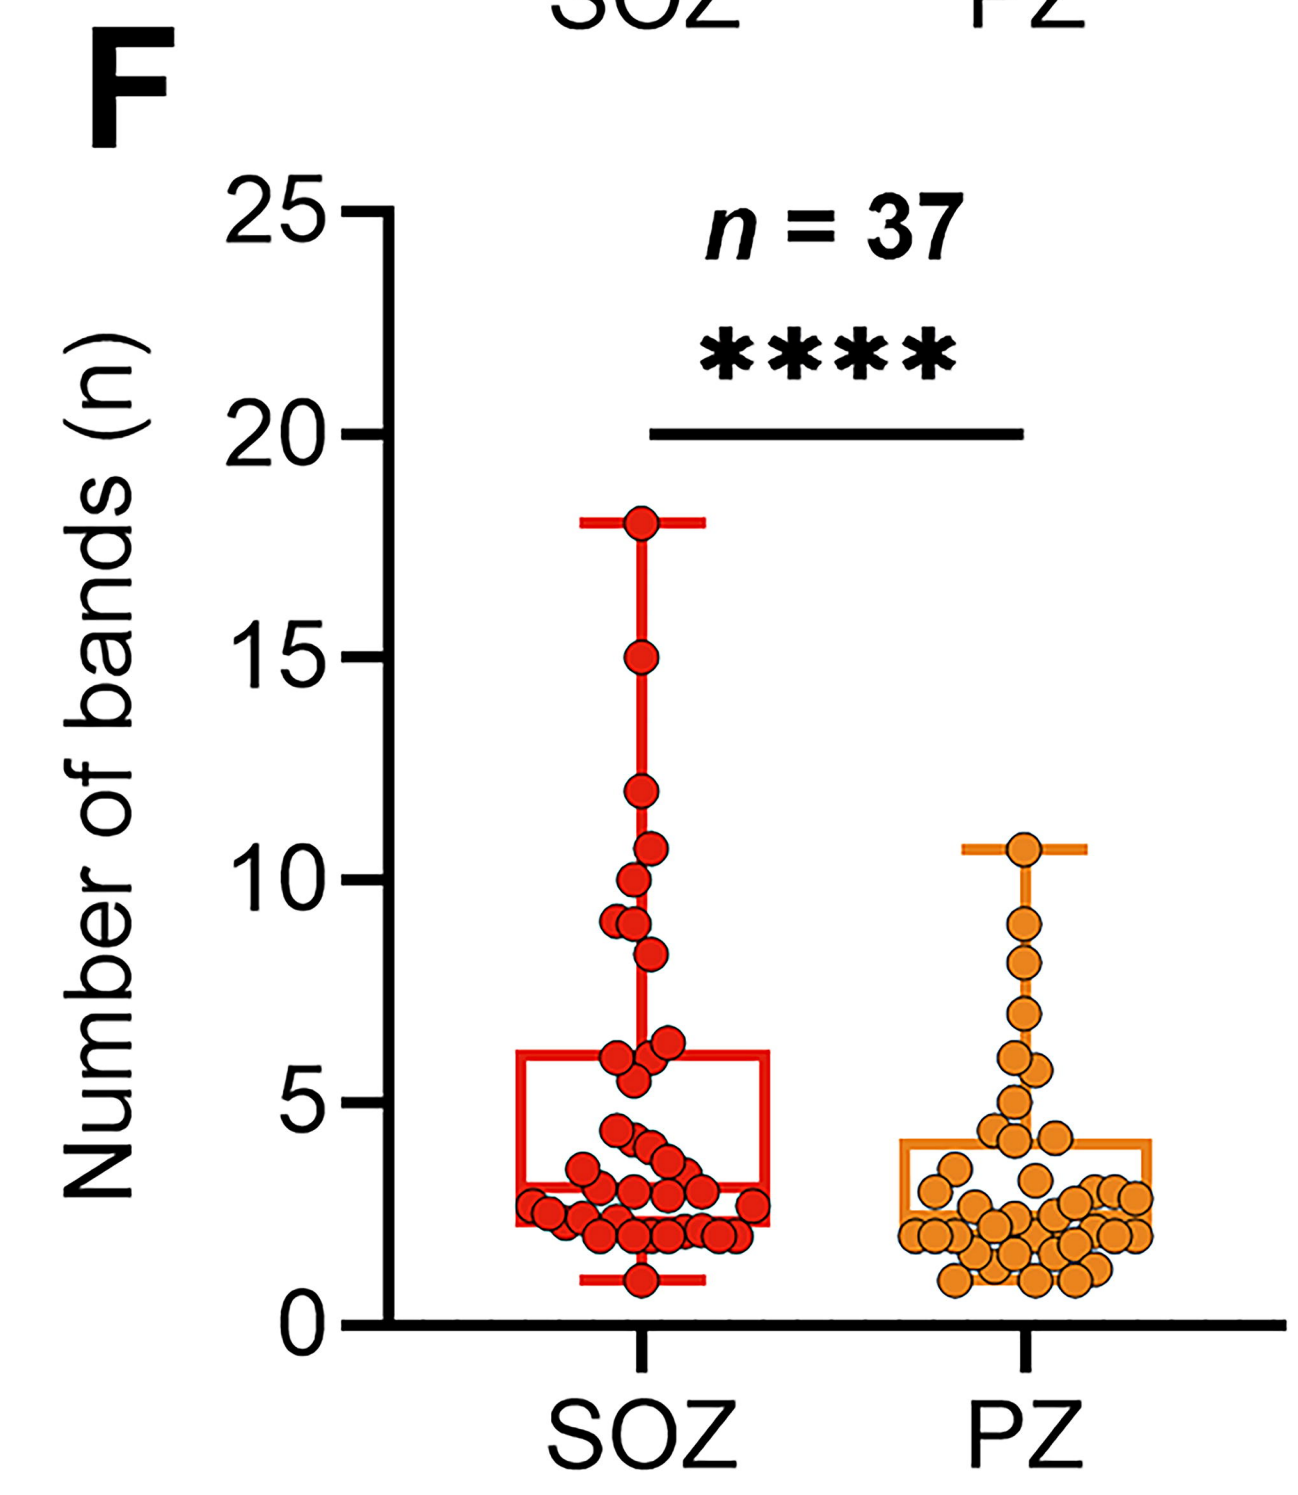

# Figure 3

**A**

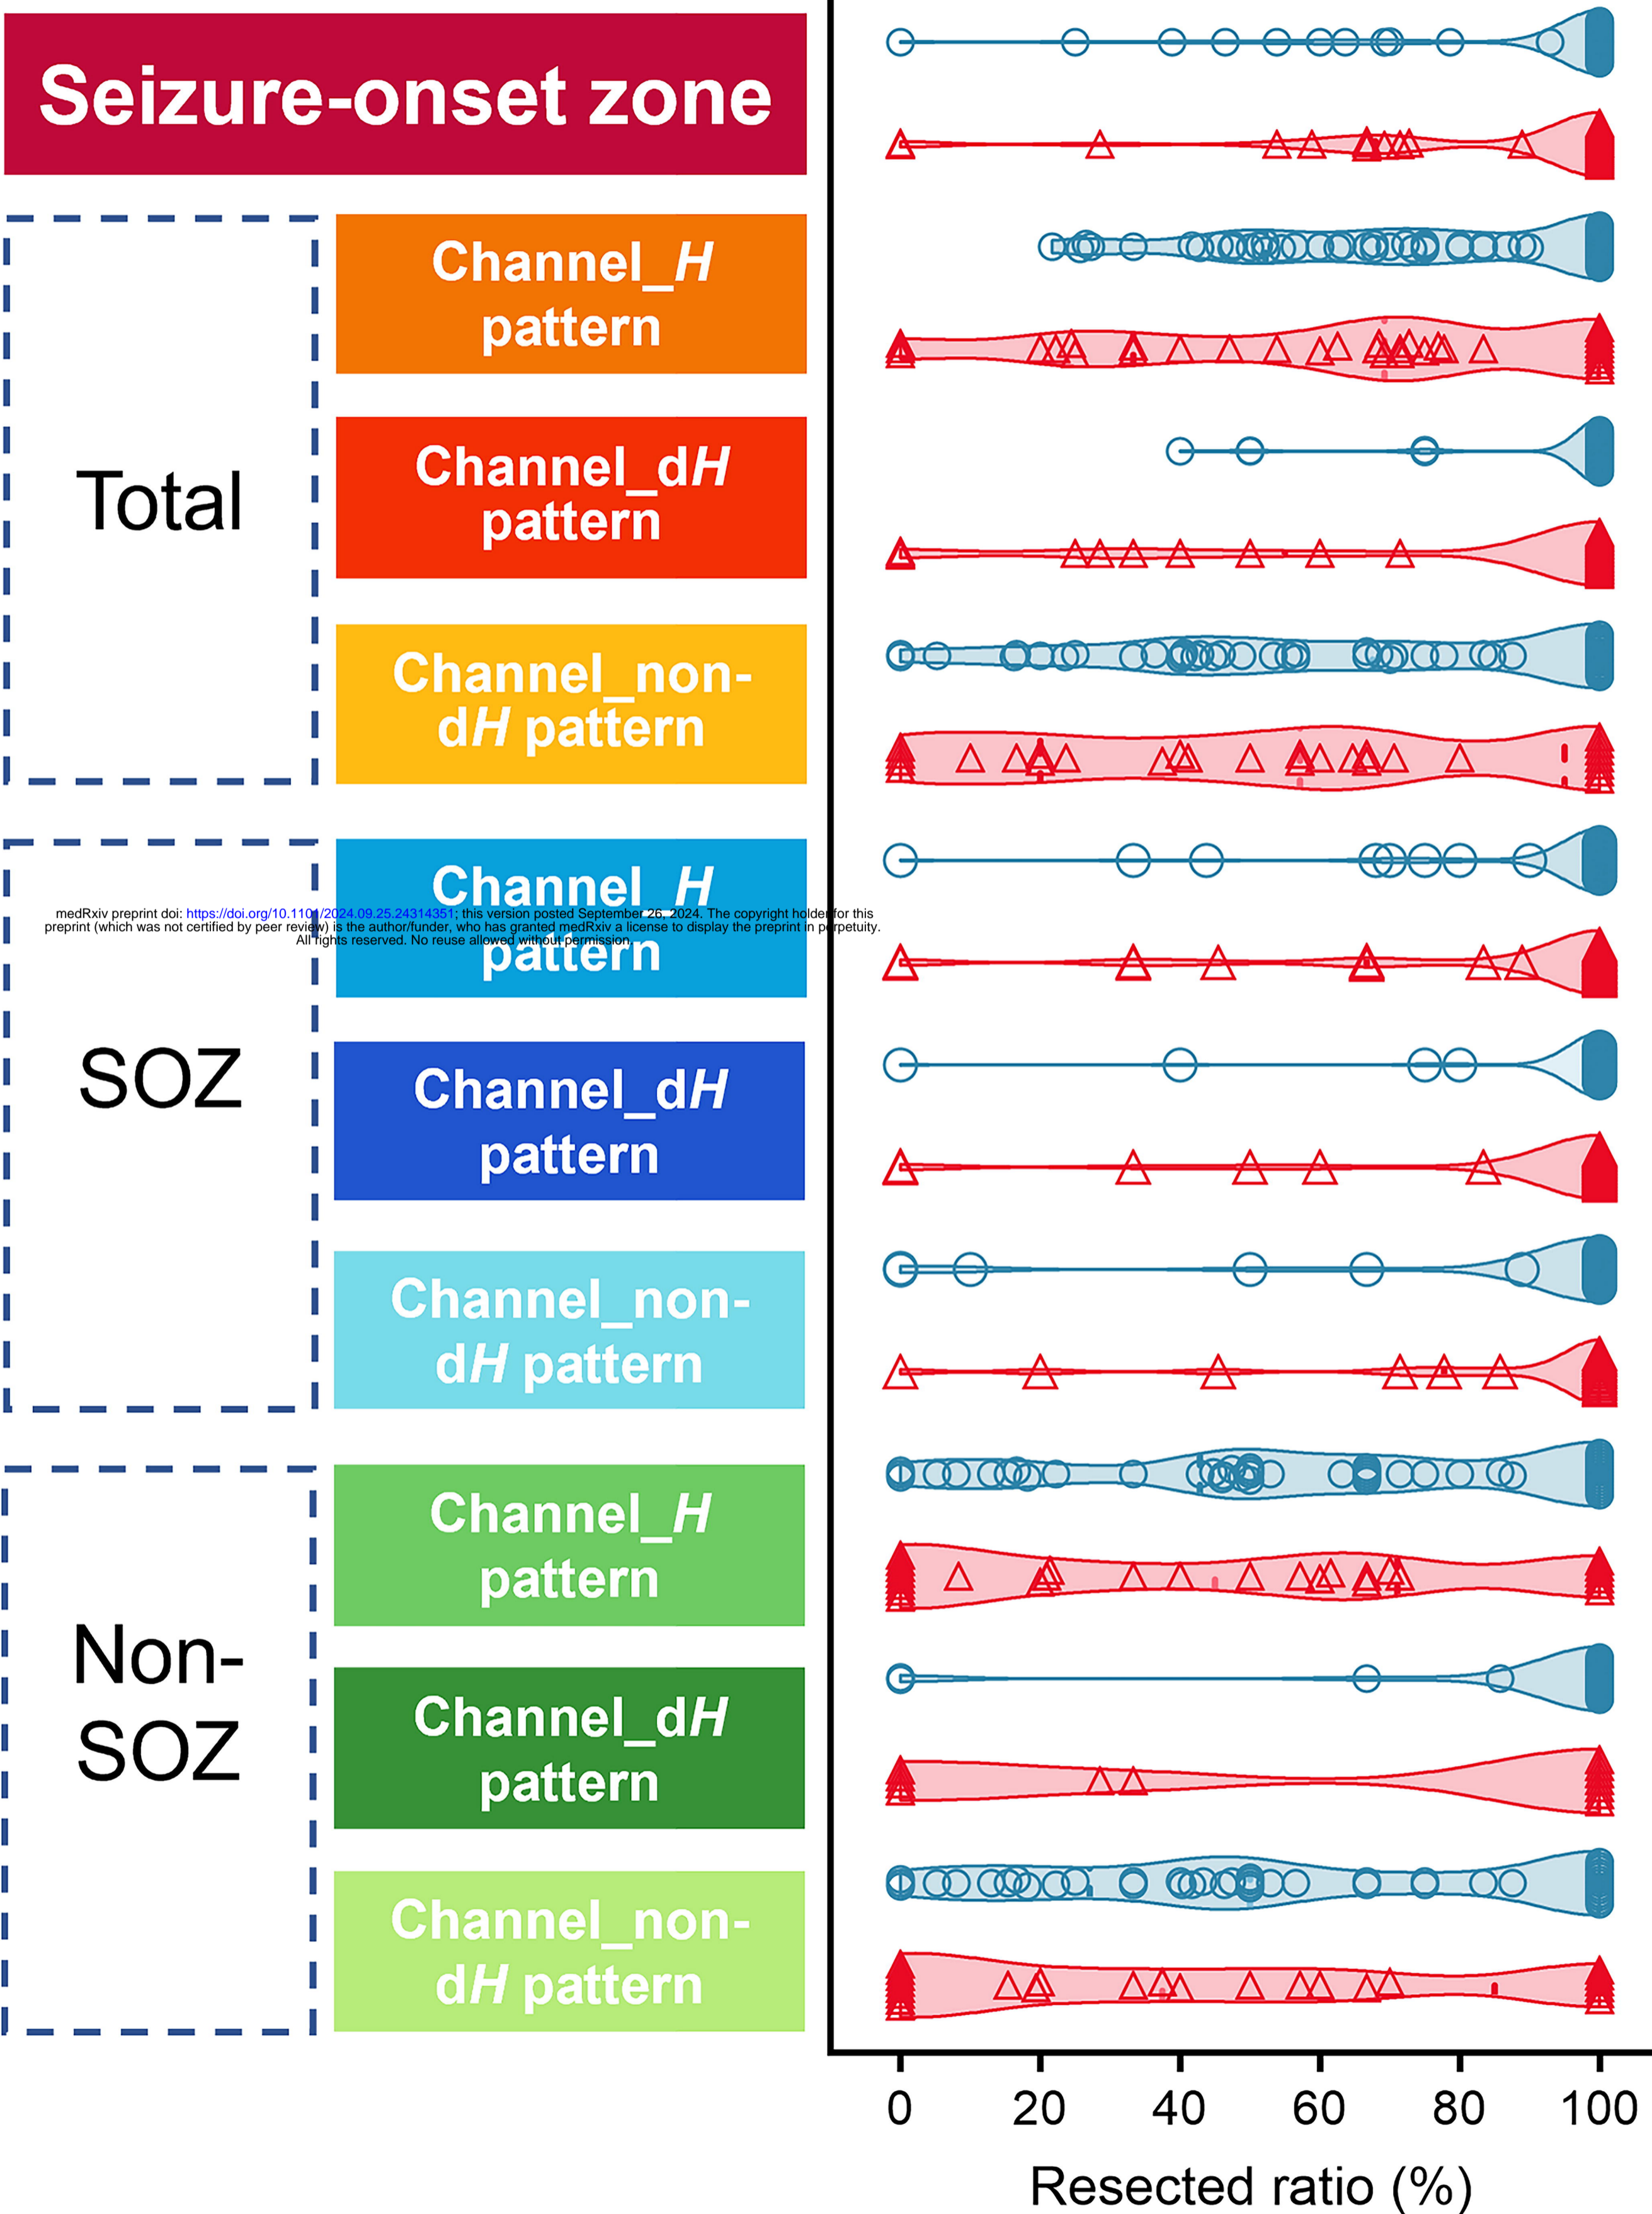

**B**

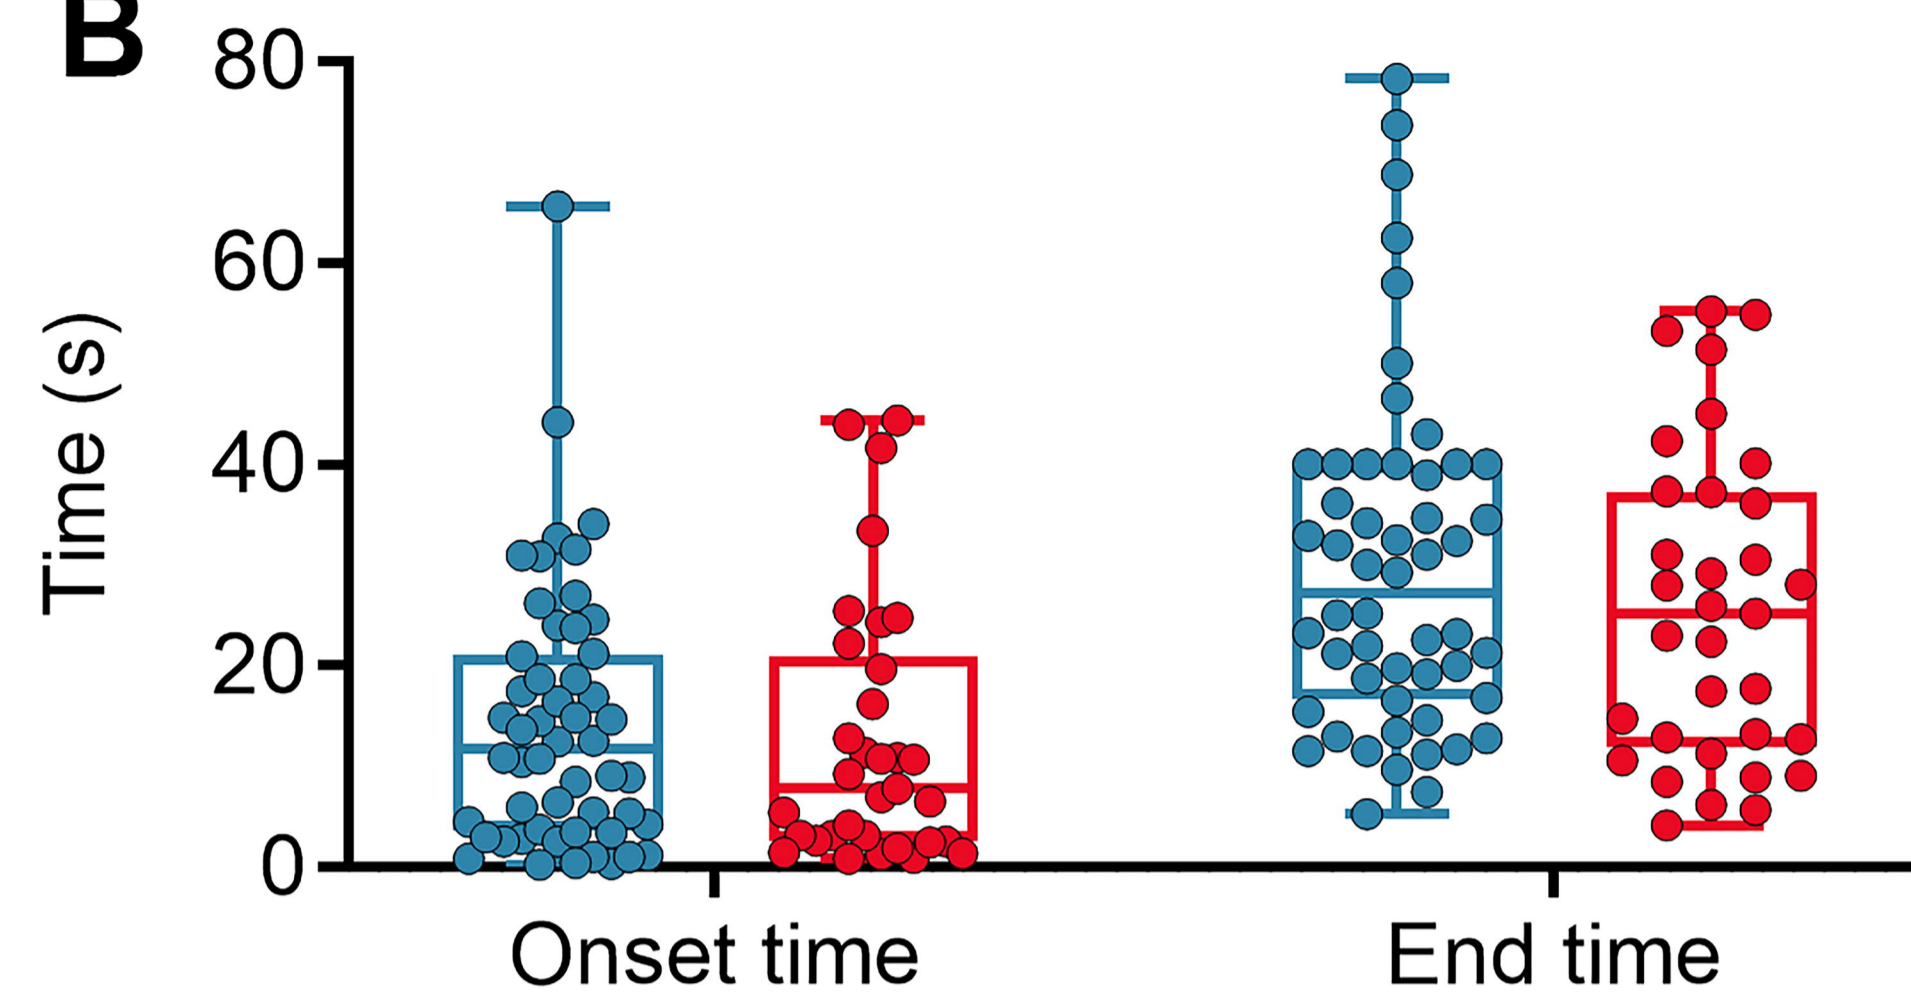

**C**

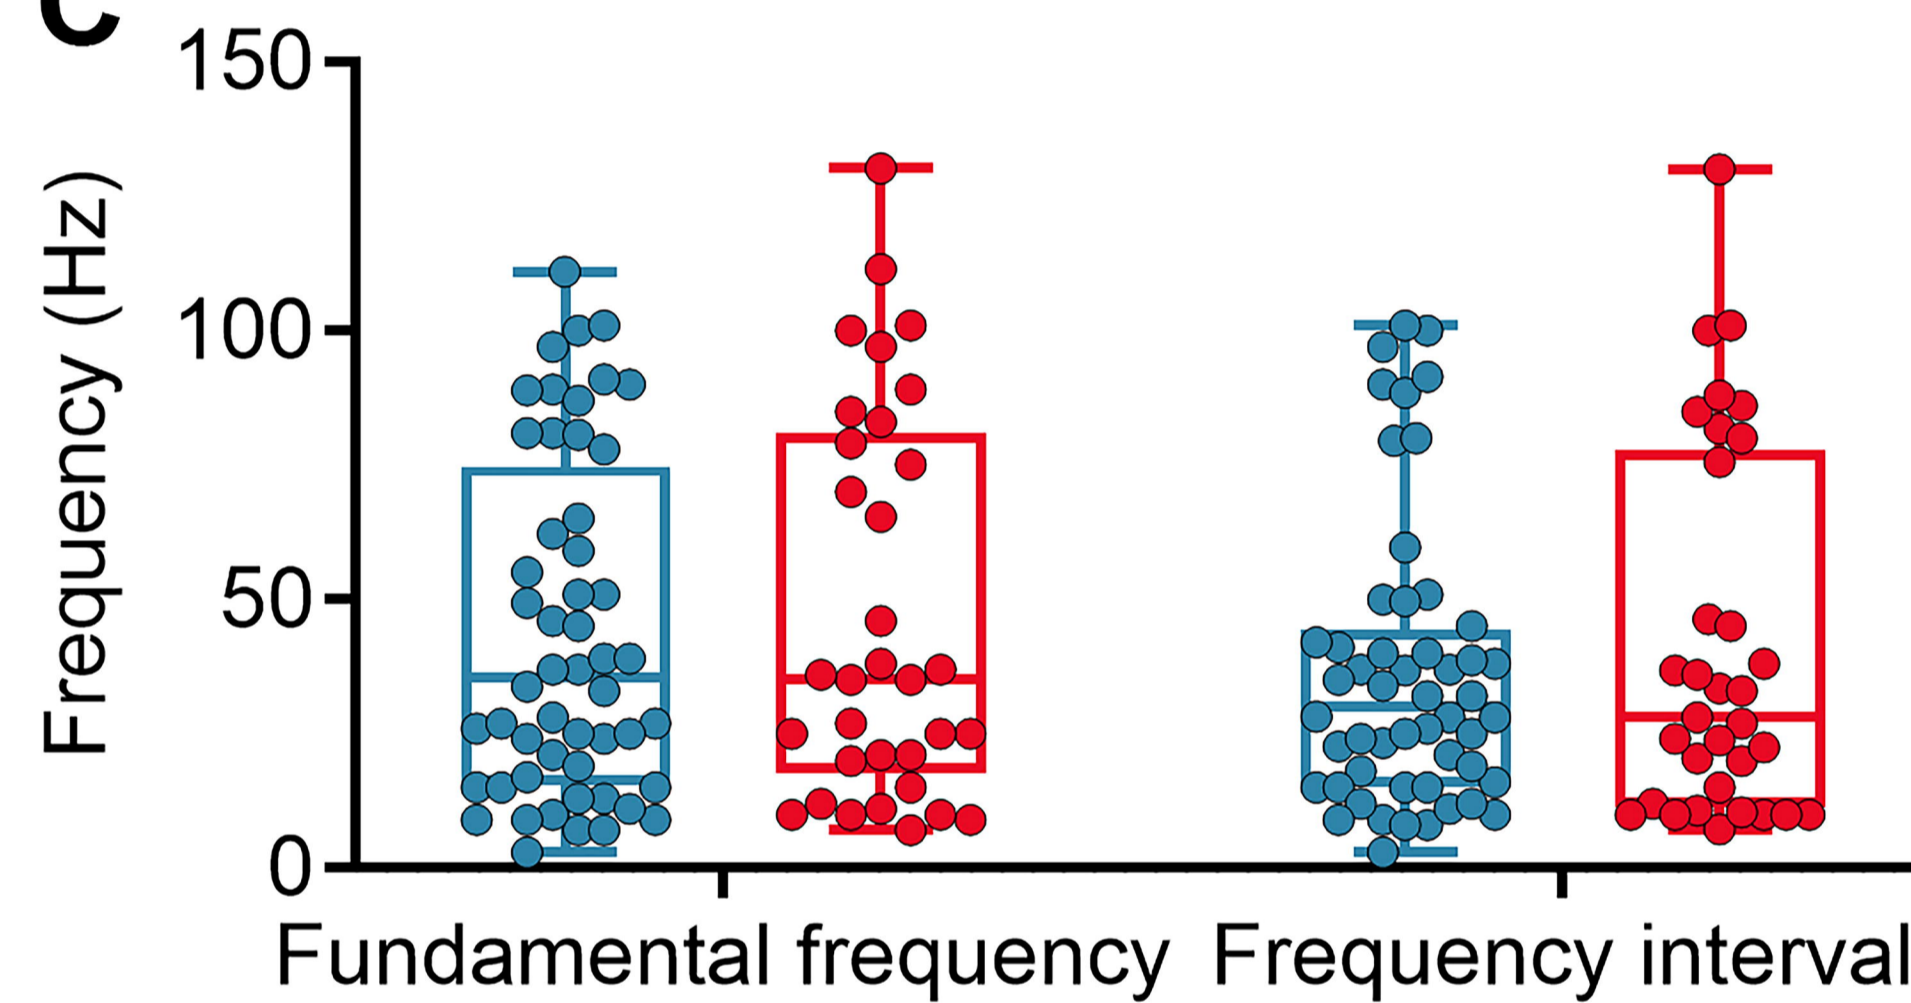

**D**

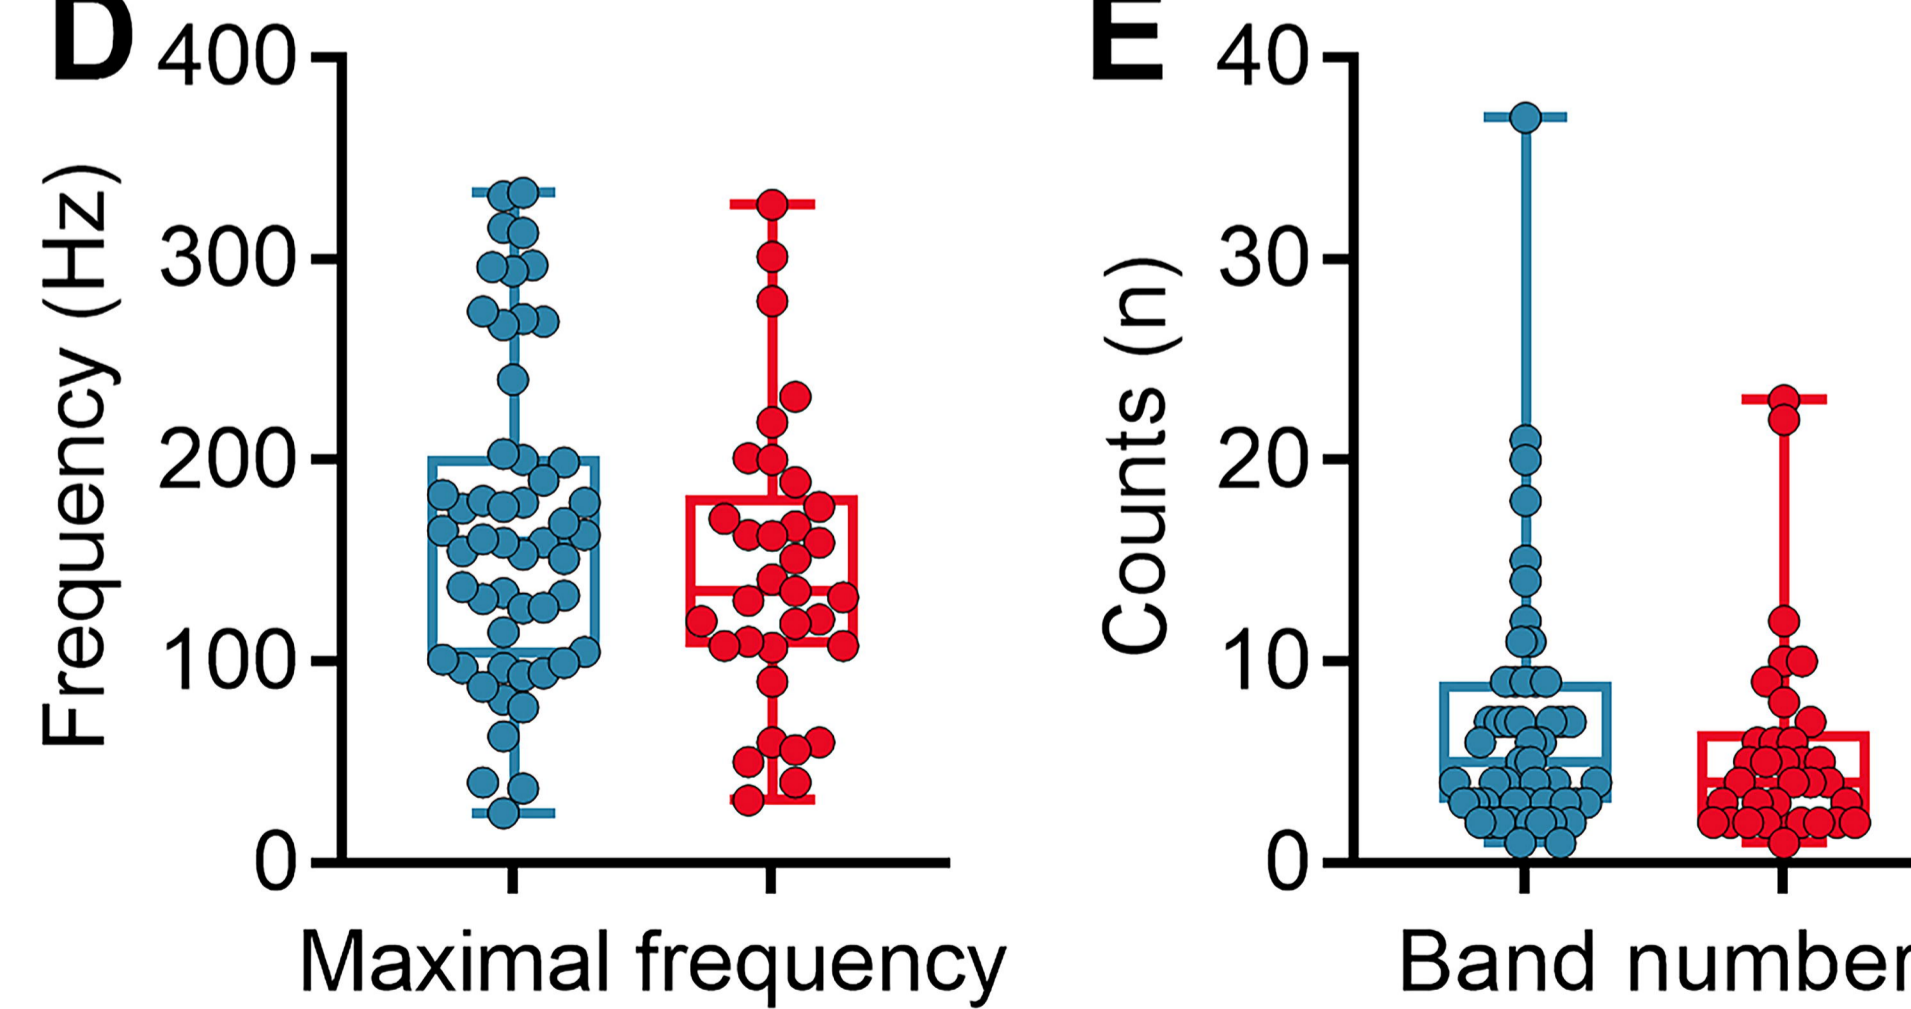

**E**

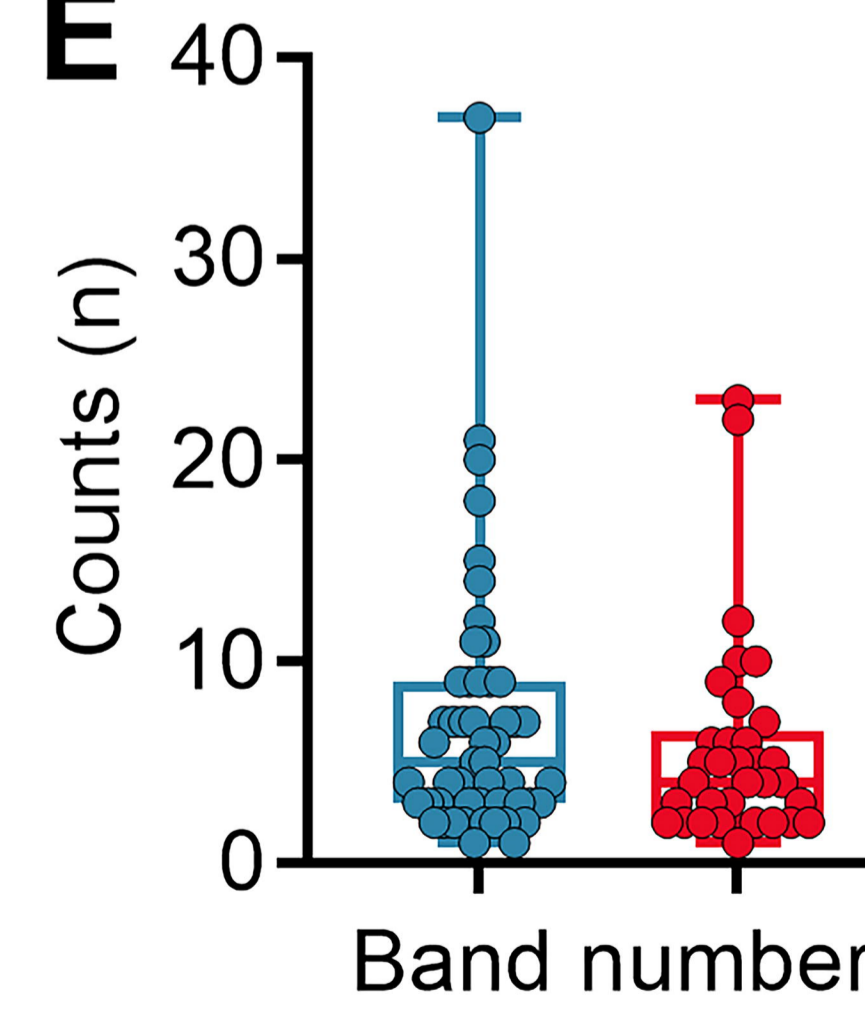

seizure-free

non-seizure free

# Figure 4

medRxiv preprint doi: <https://doi.org/10.1101/2024.09.25.24314351>; this version posted September 26, 2024. The copyright holder for this preprint (which was not certified by peer review) is the author/funder, who has granted medRxiv a license to display the preprint in perpetuity. All rights reserved. No reuse allowed without permission.

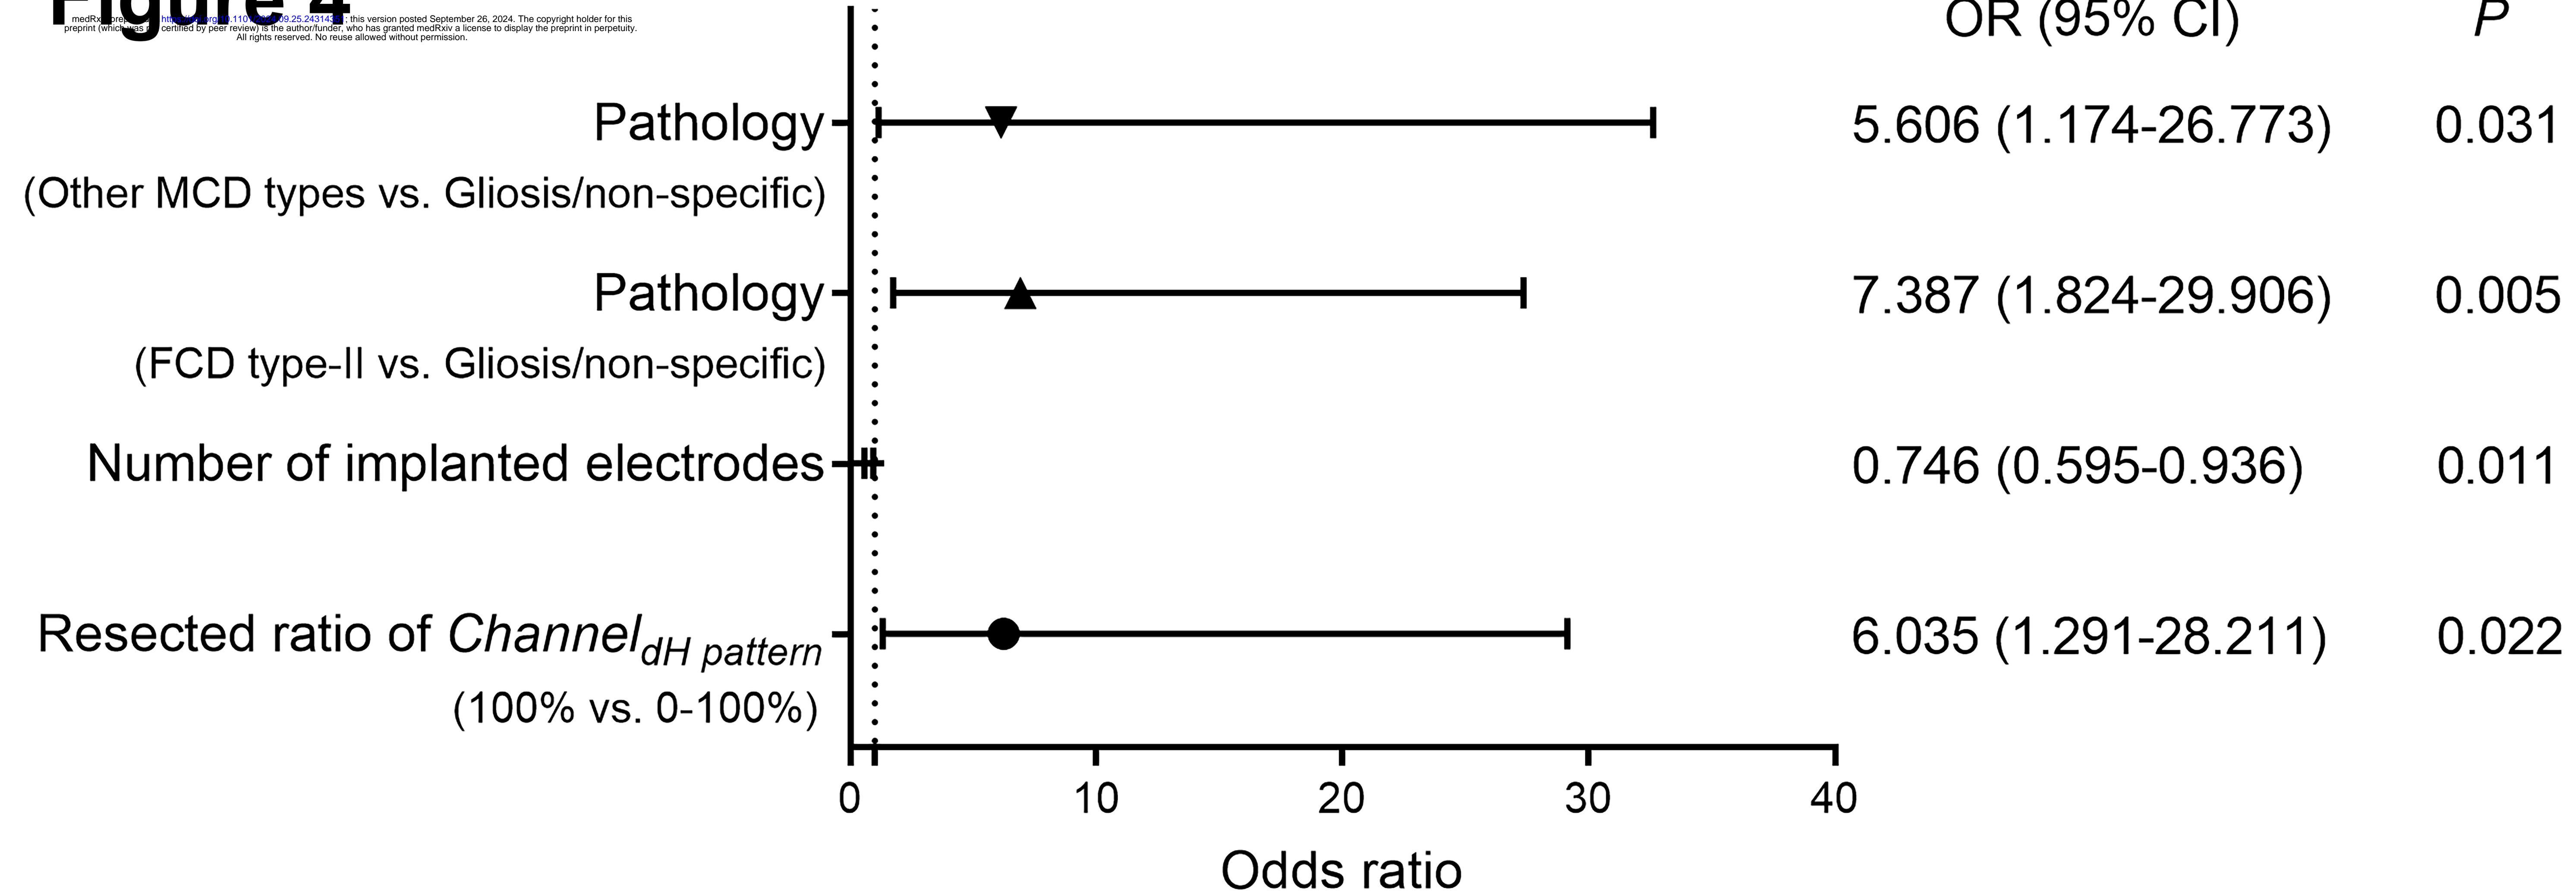

# Figure 5

**A****Seizure-onset zone**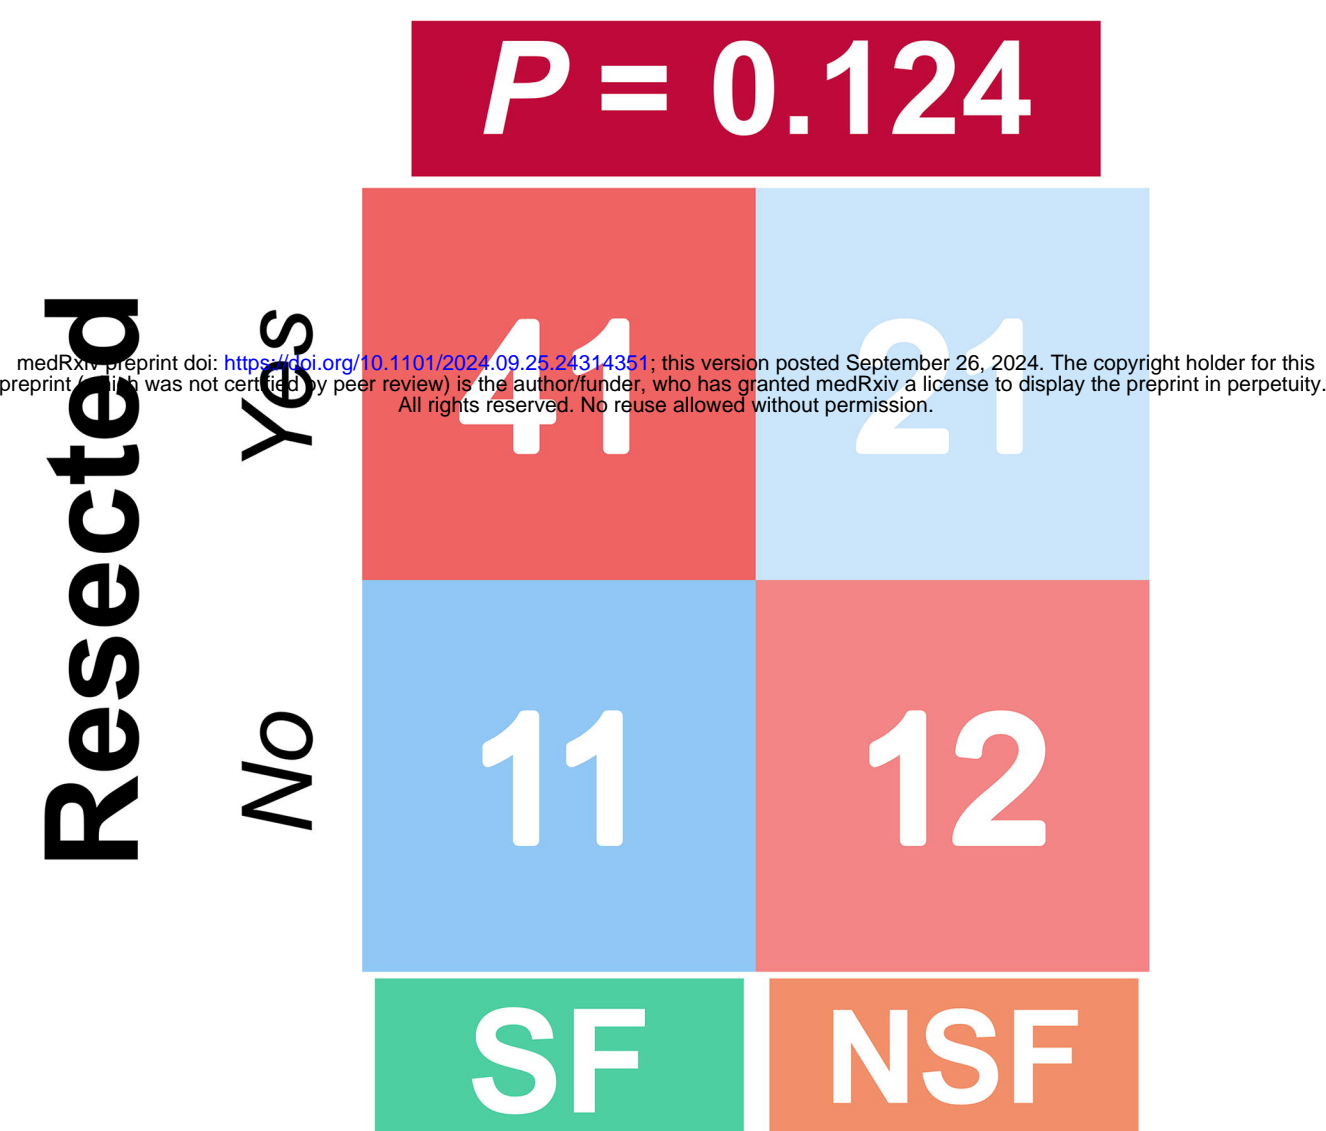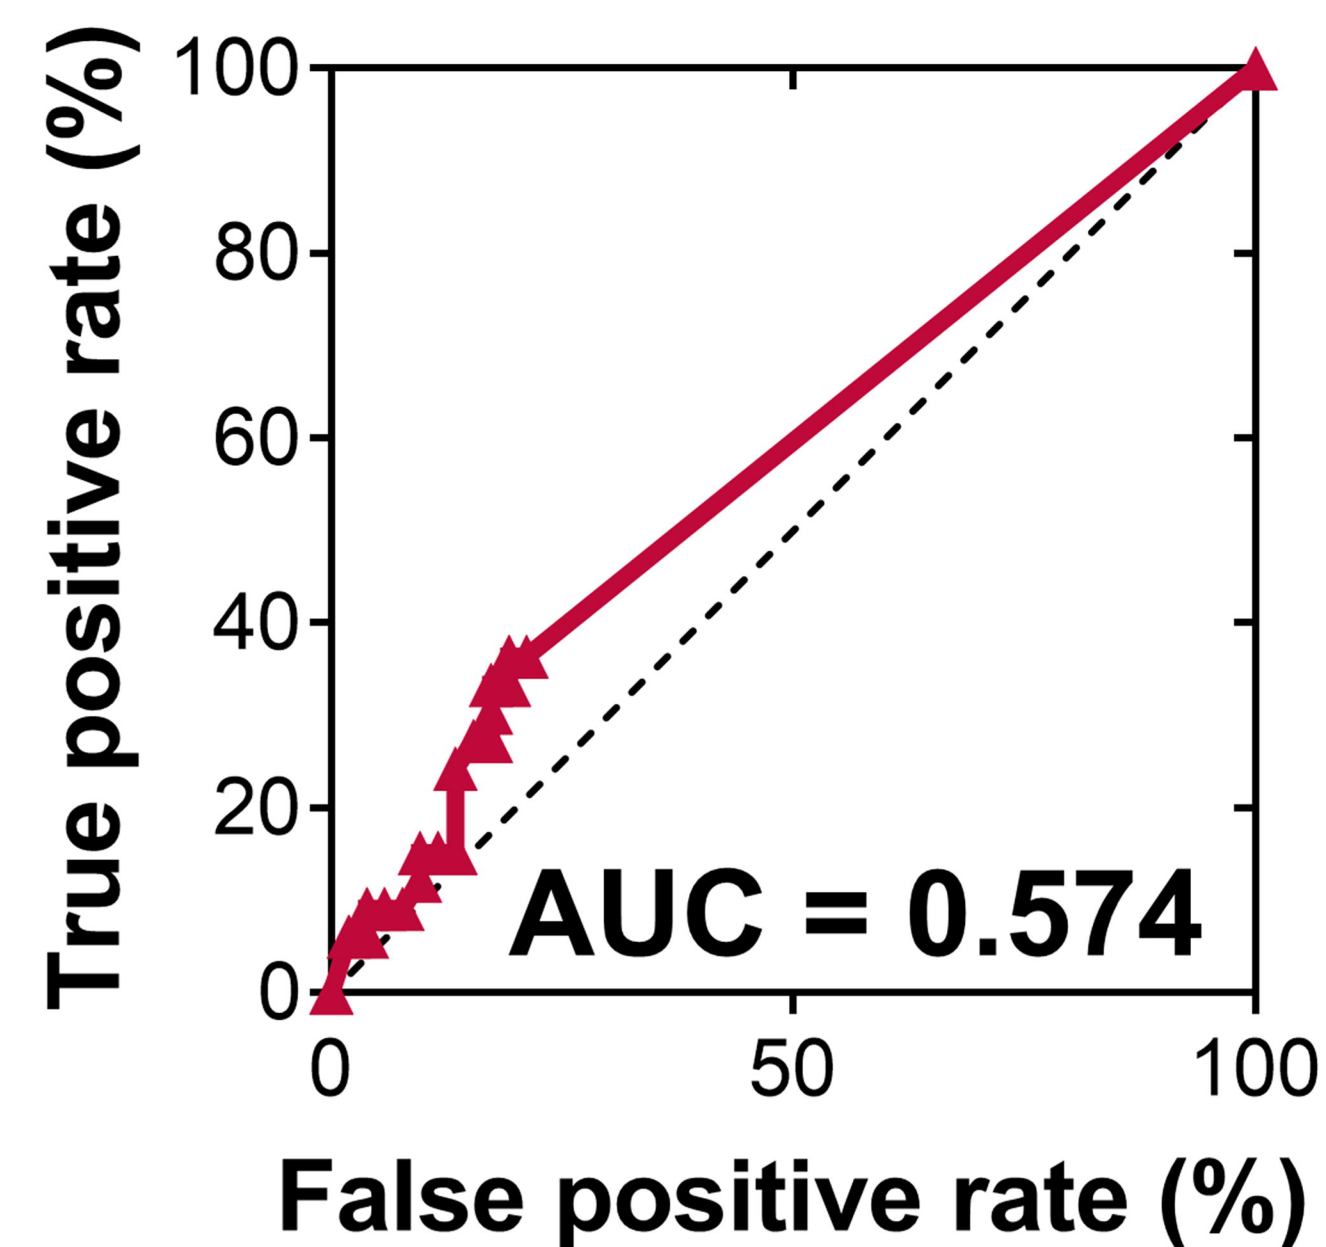**B****Channel\_H pattern**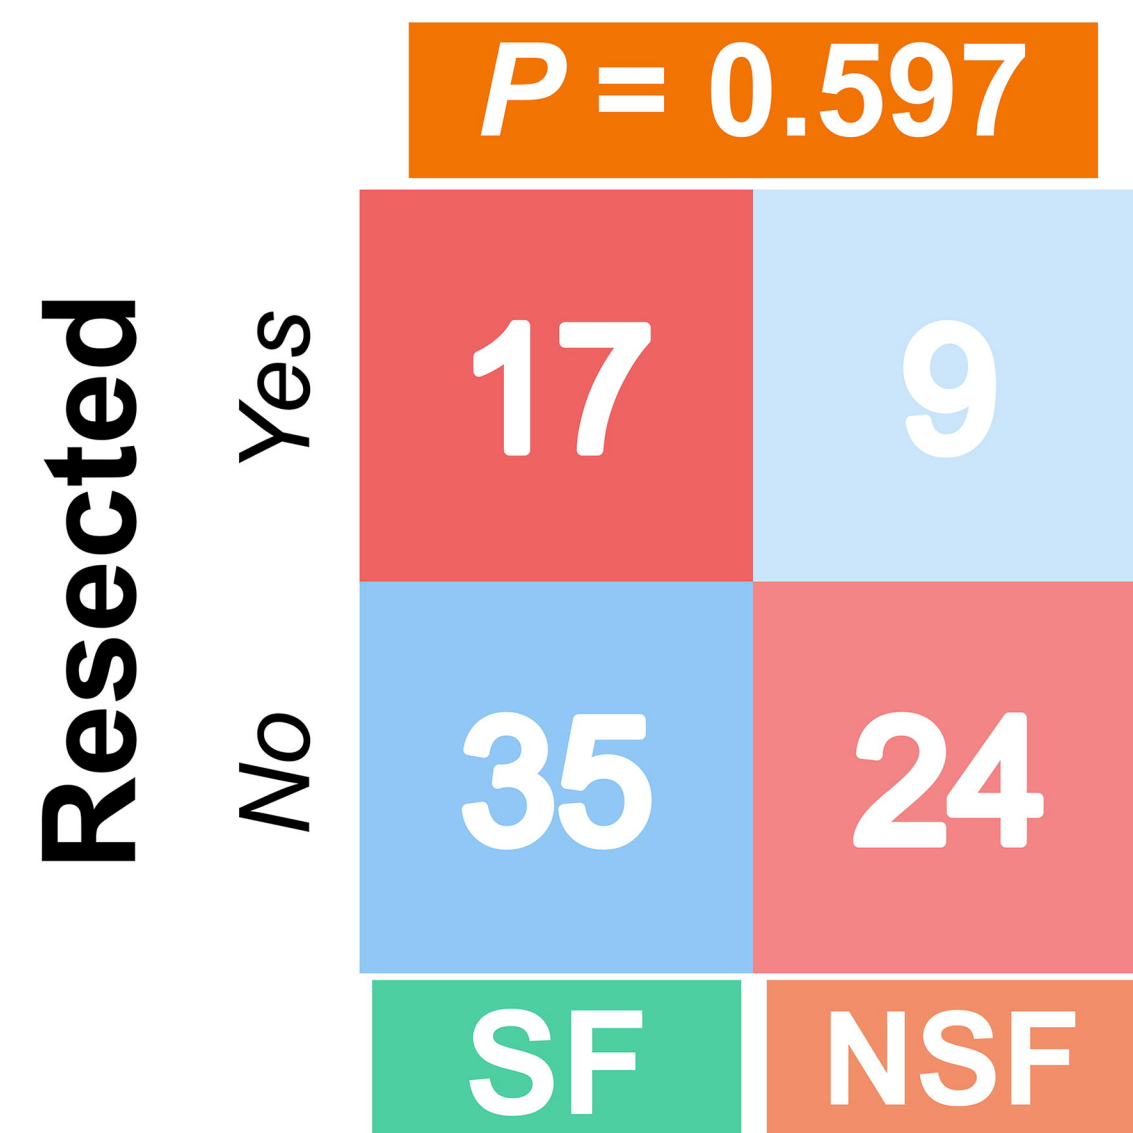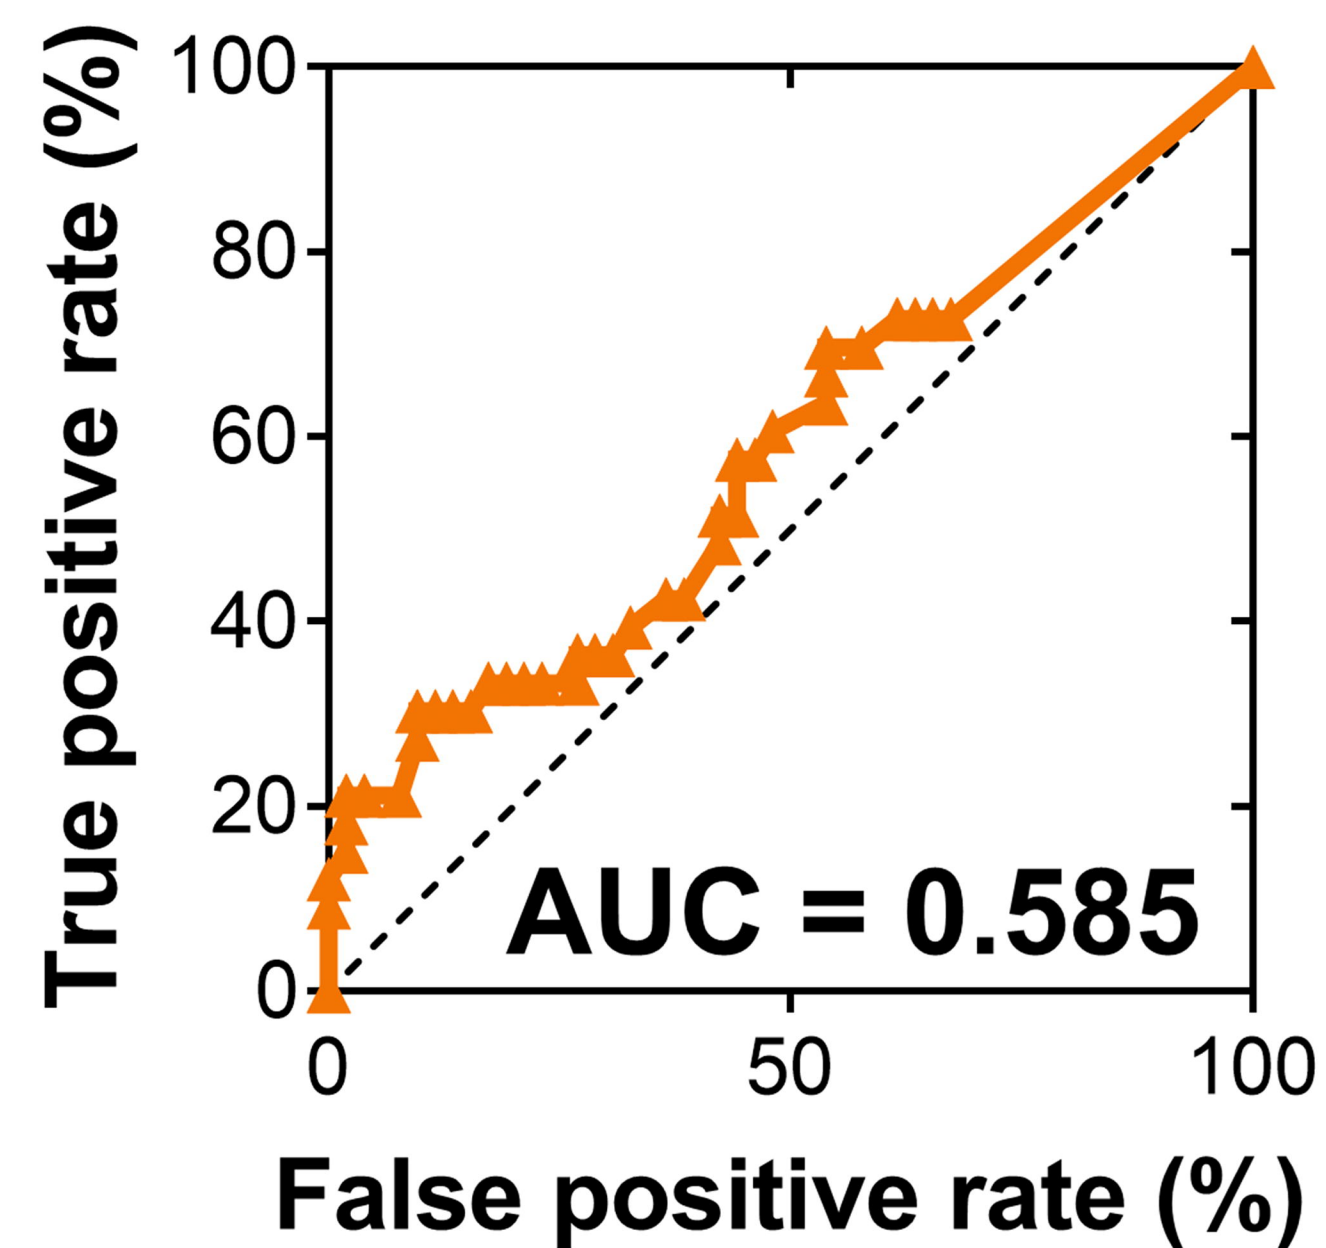**C****Channel\_dH pattern**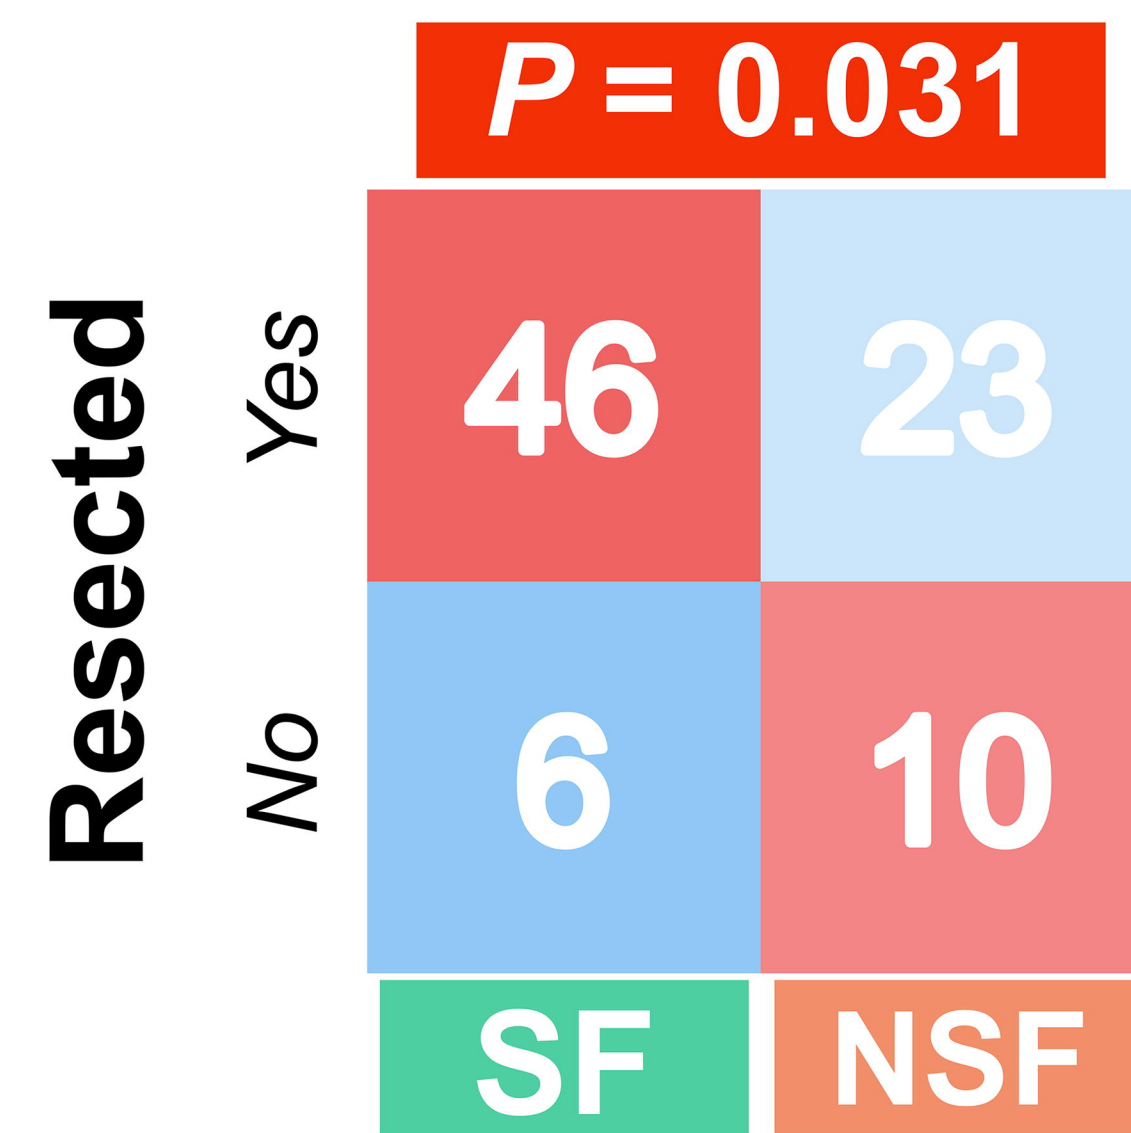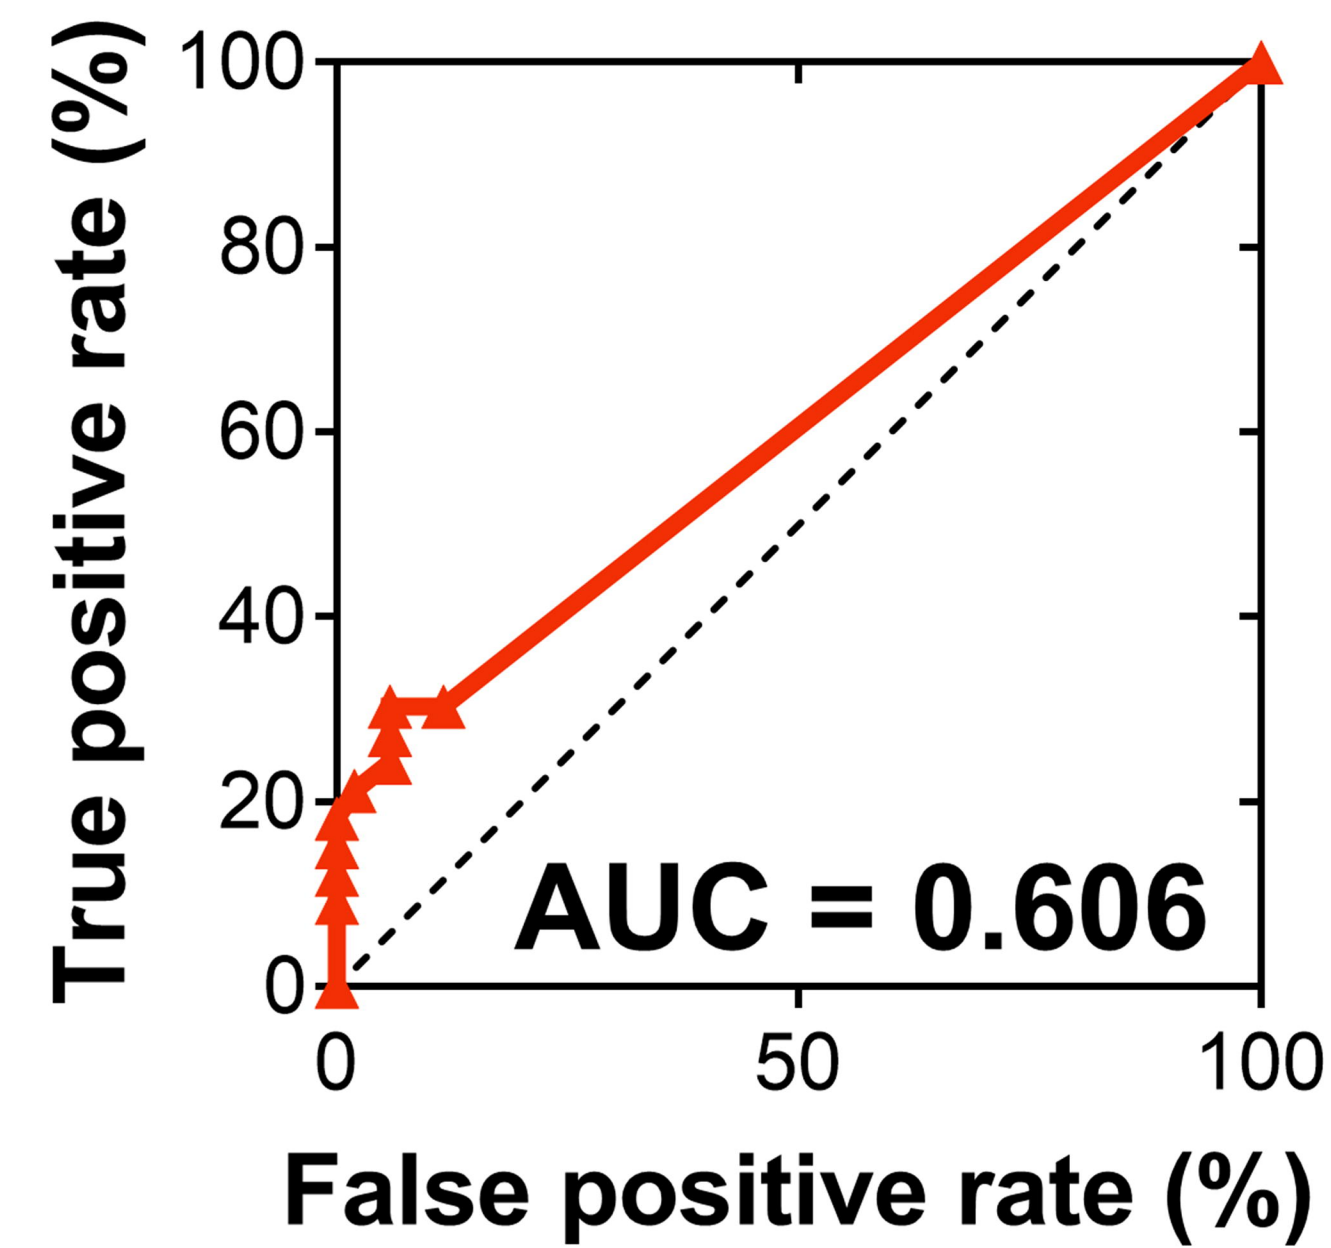**D****Channel\_non-dH pattern**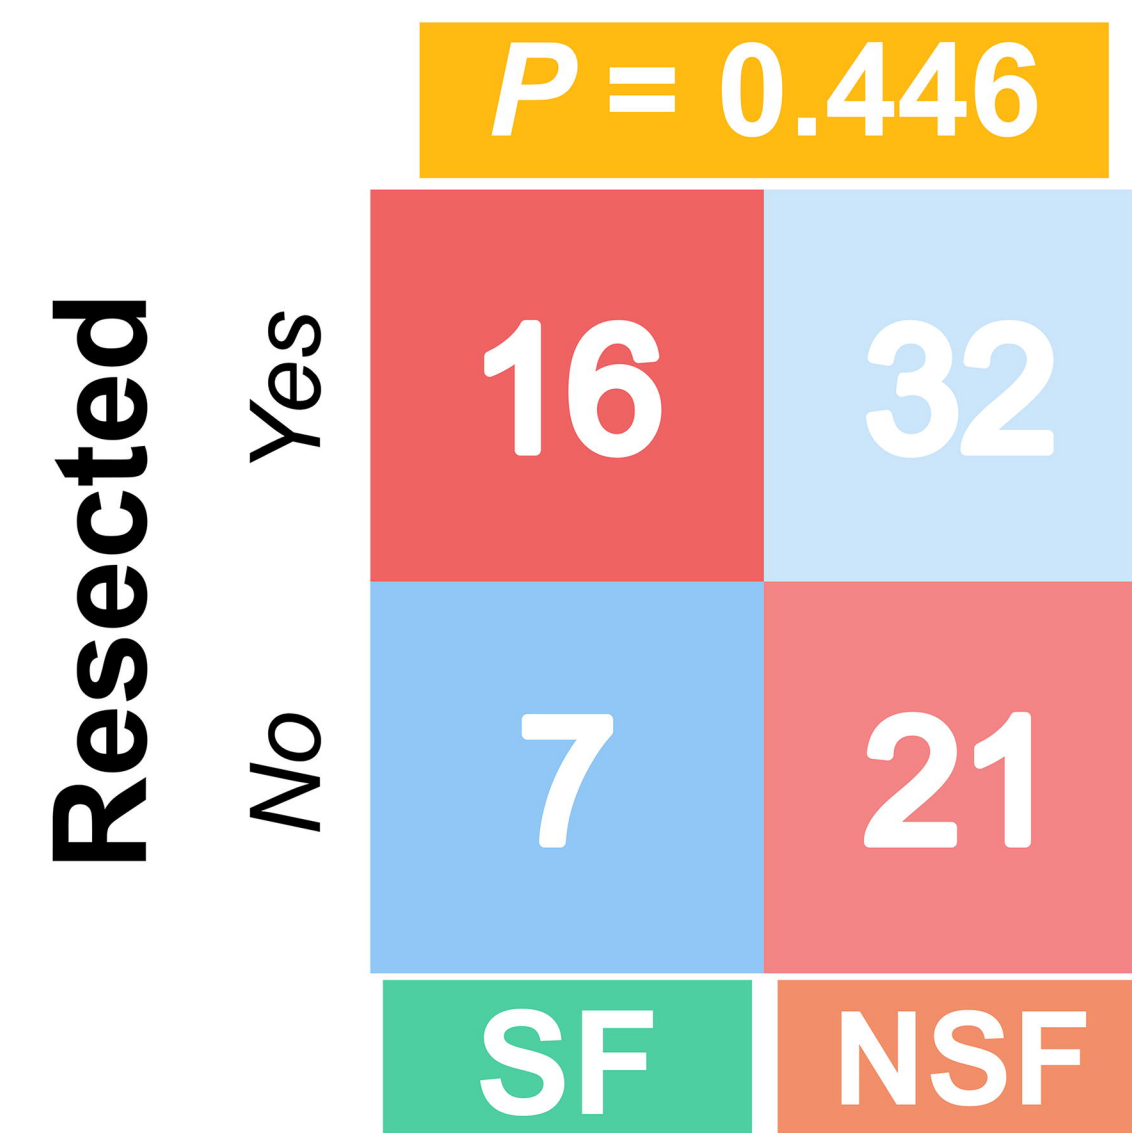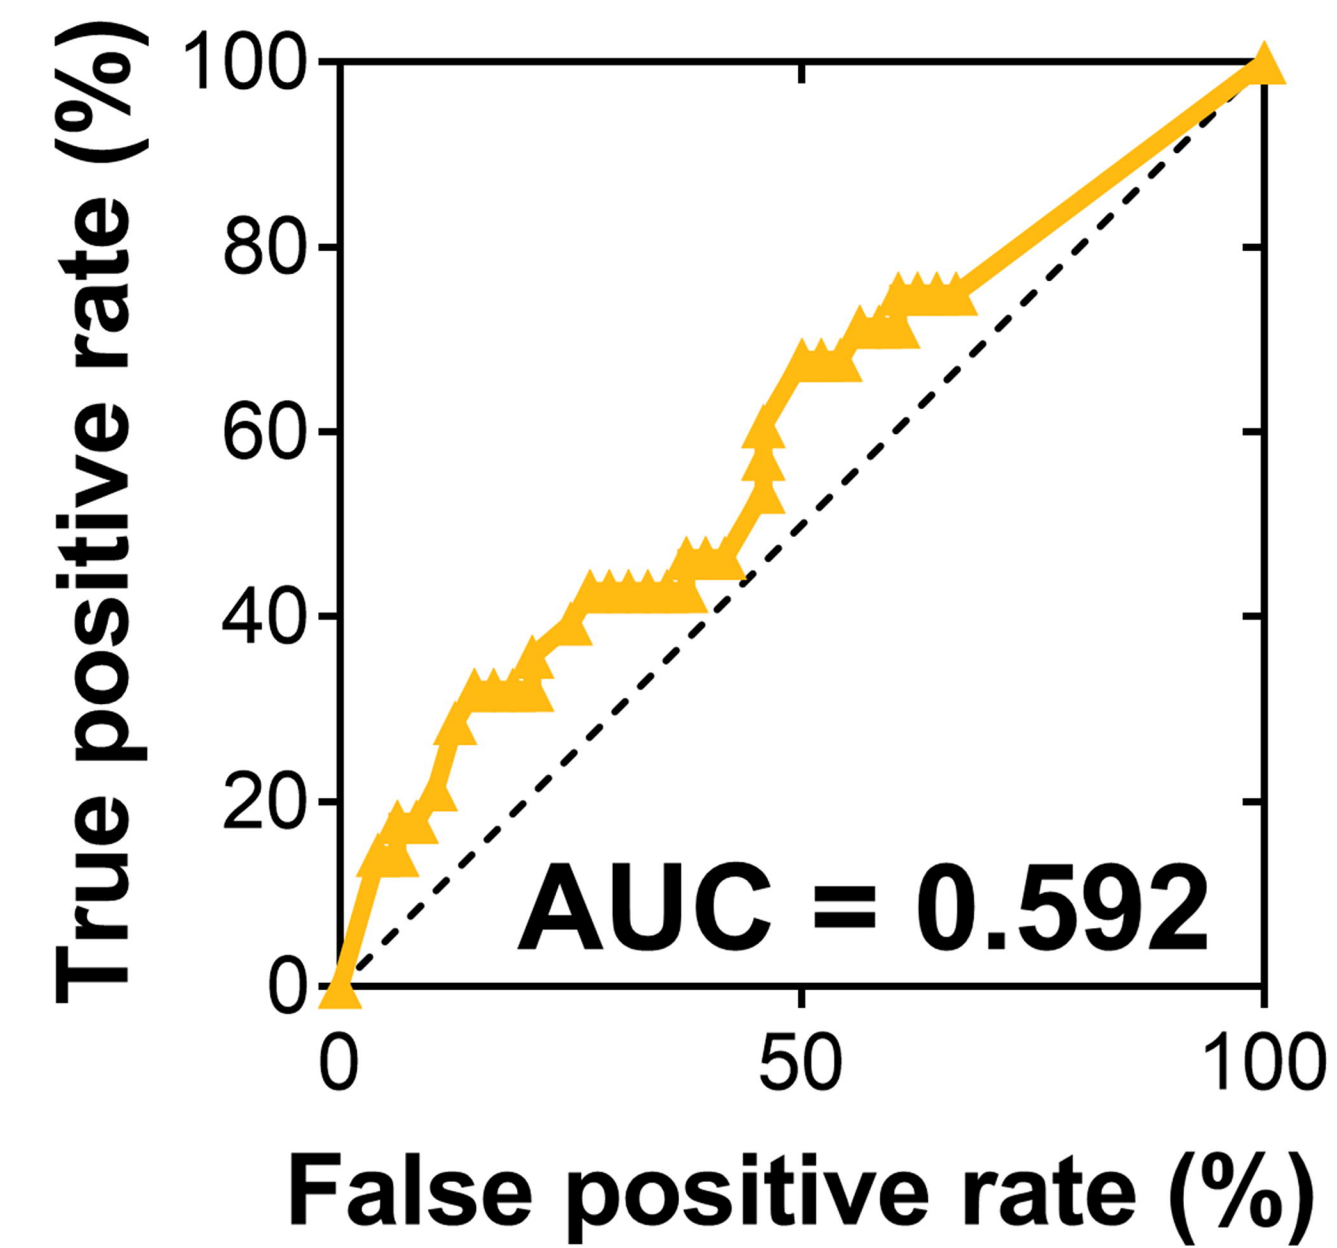

# Figure 6

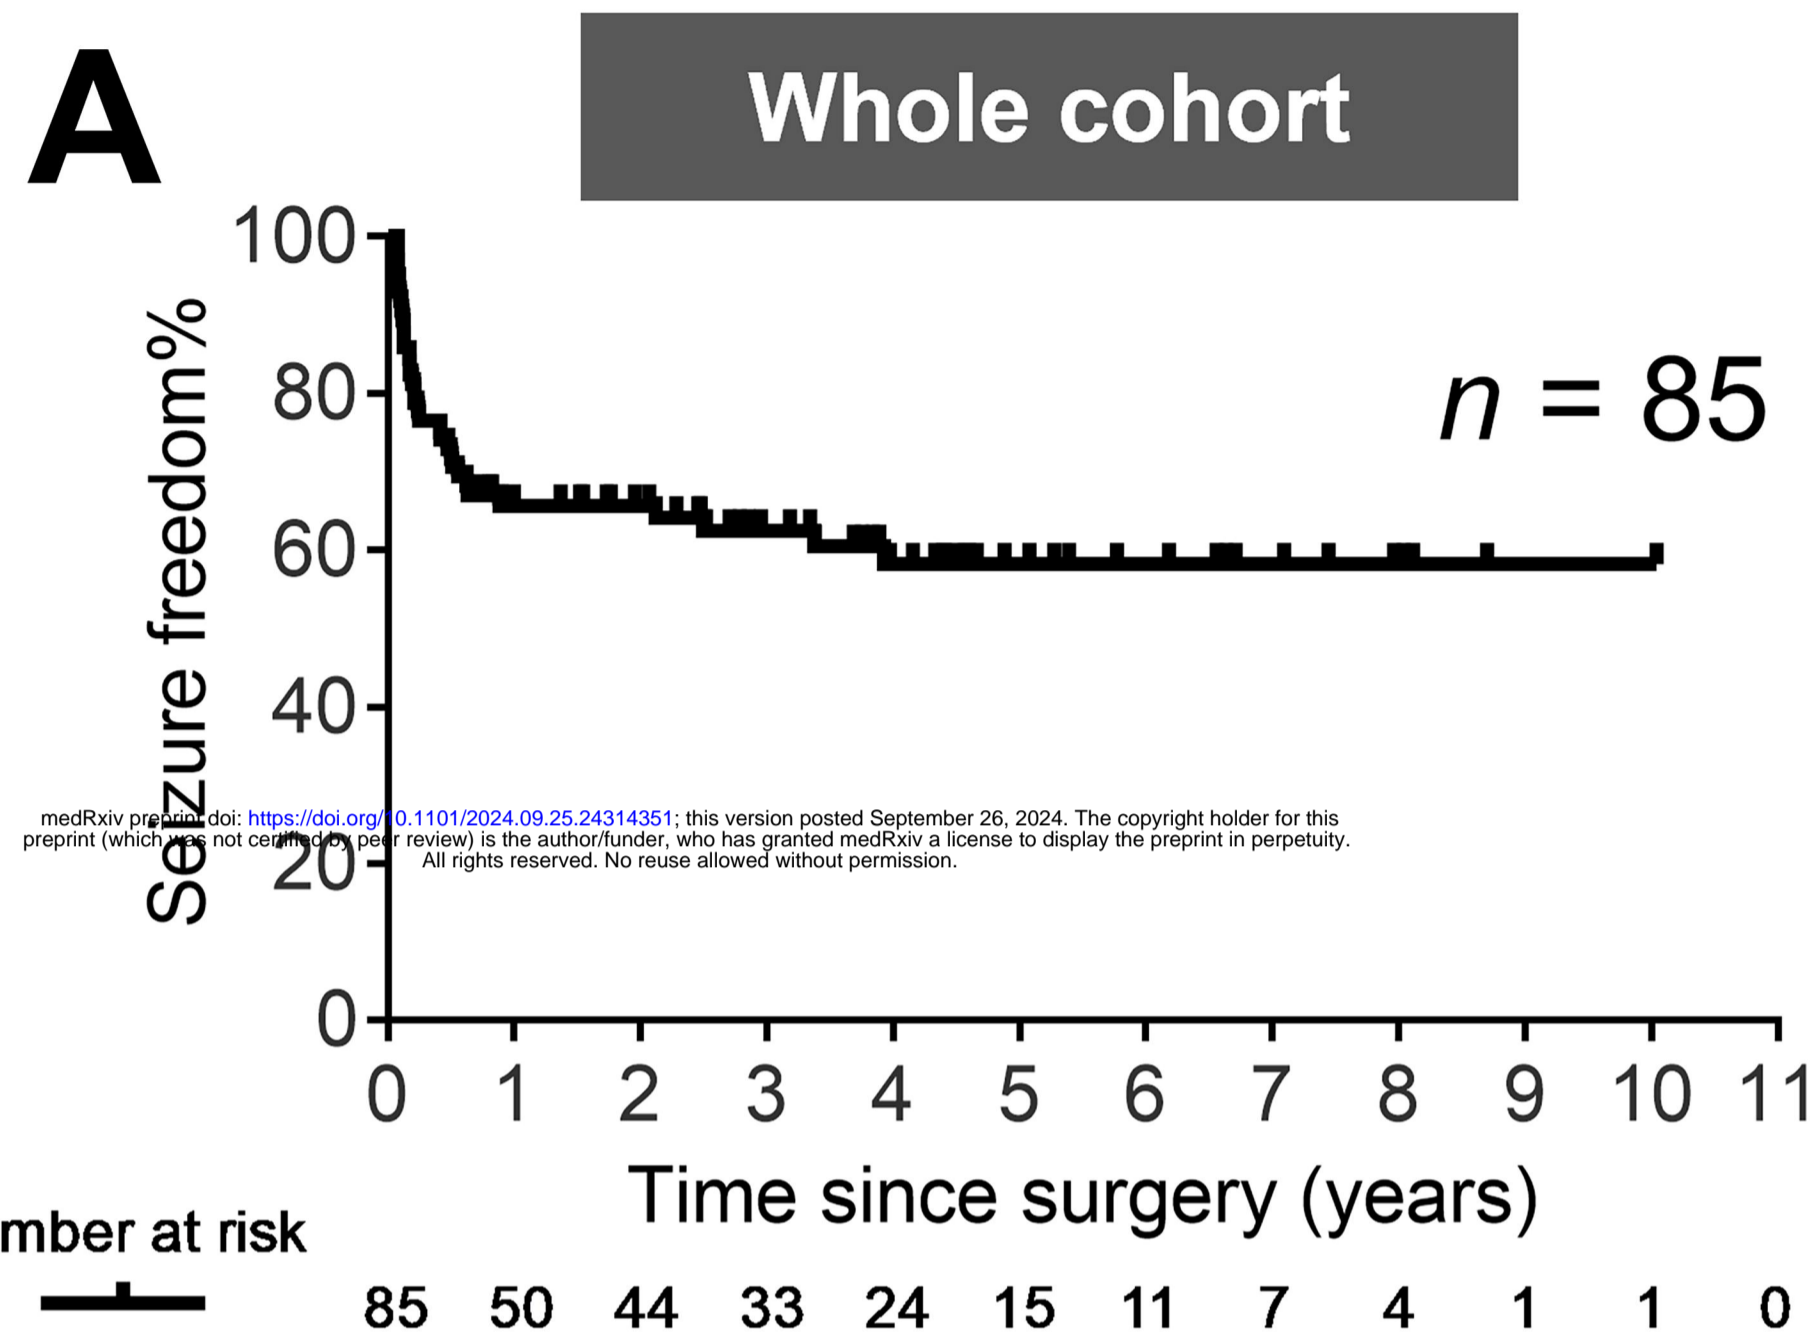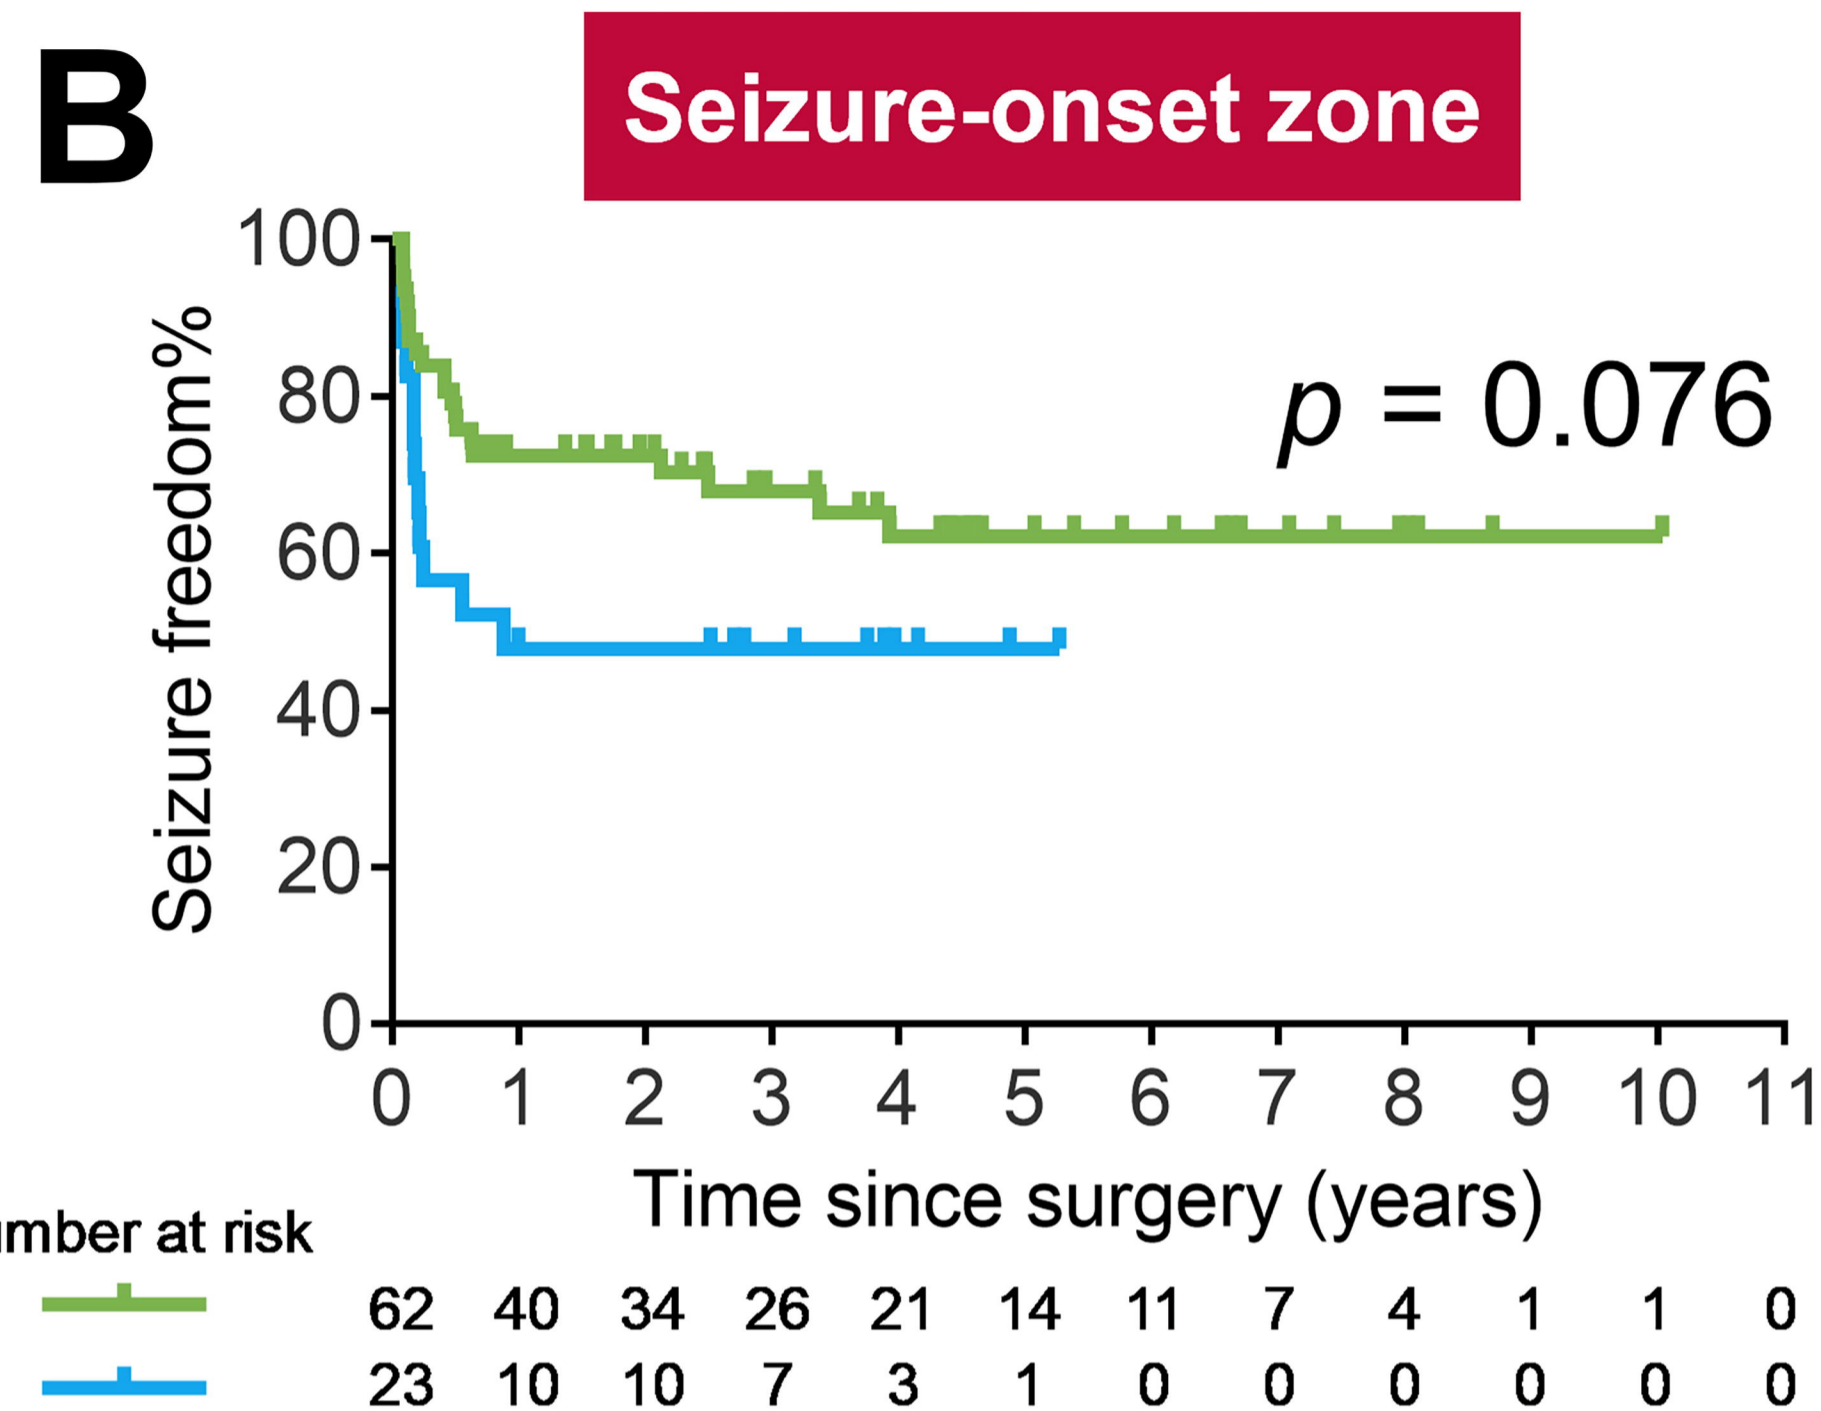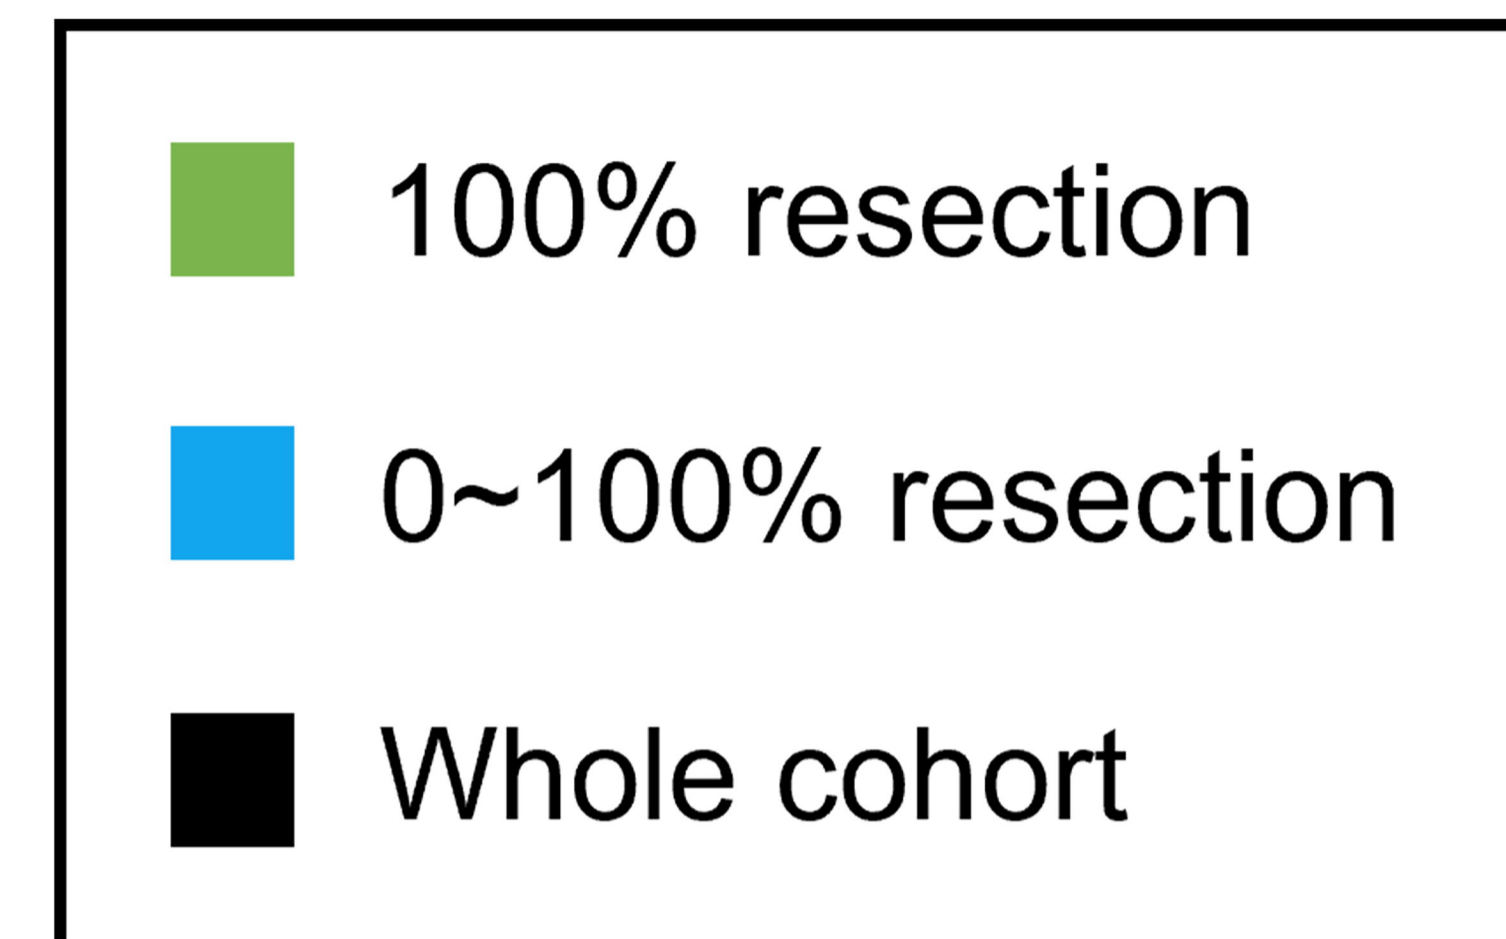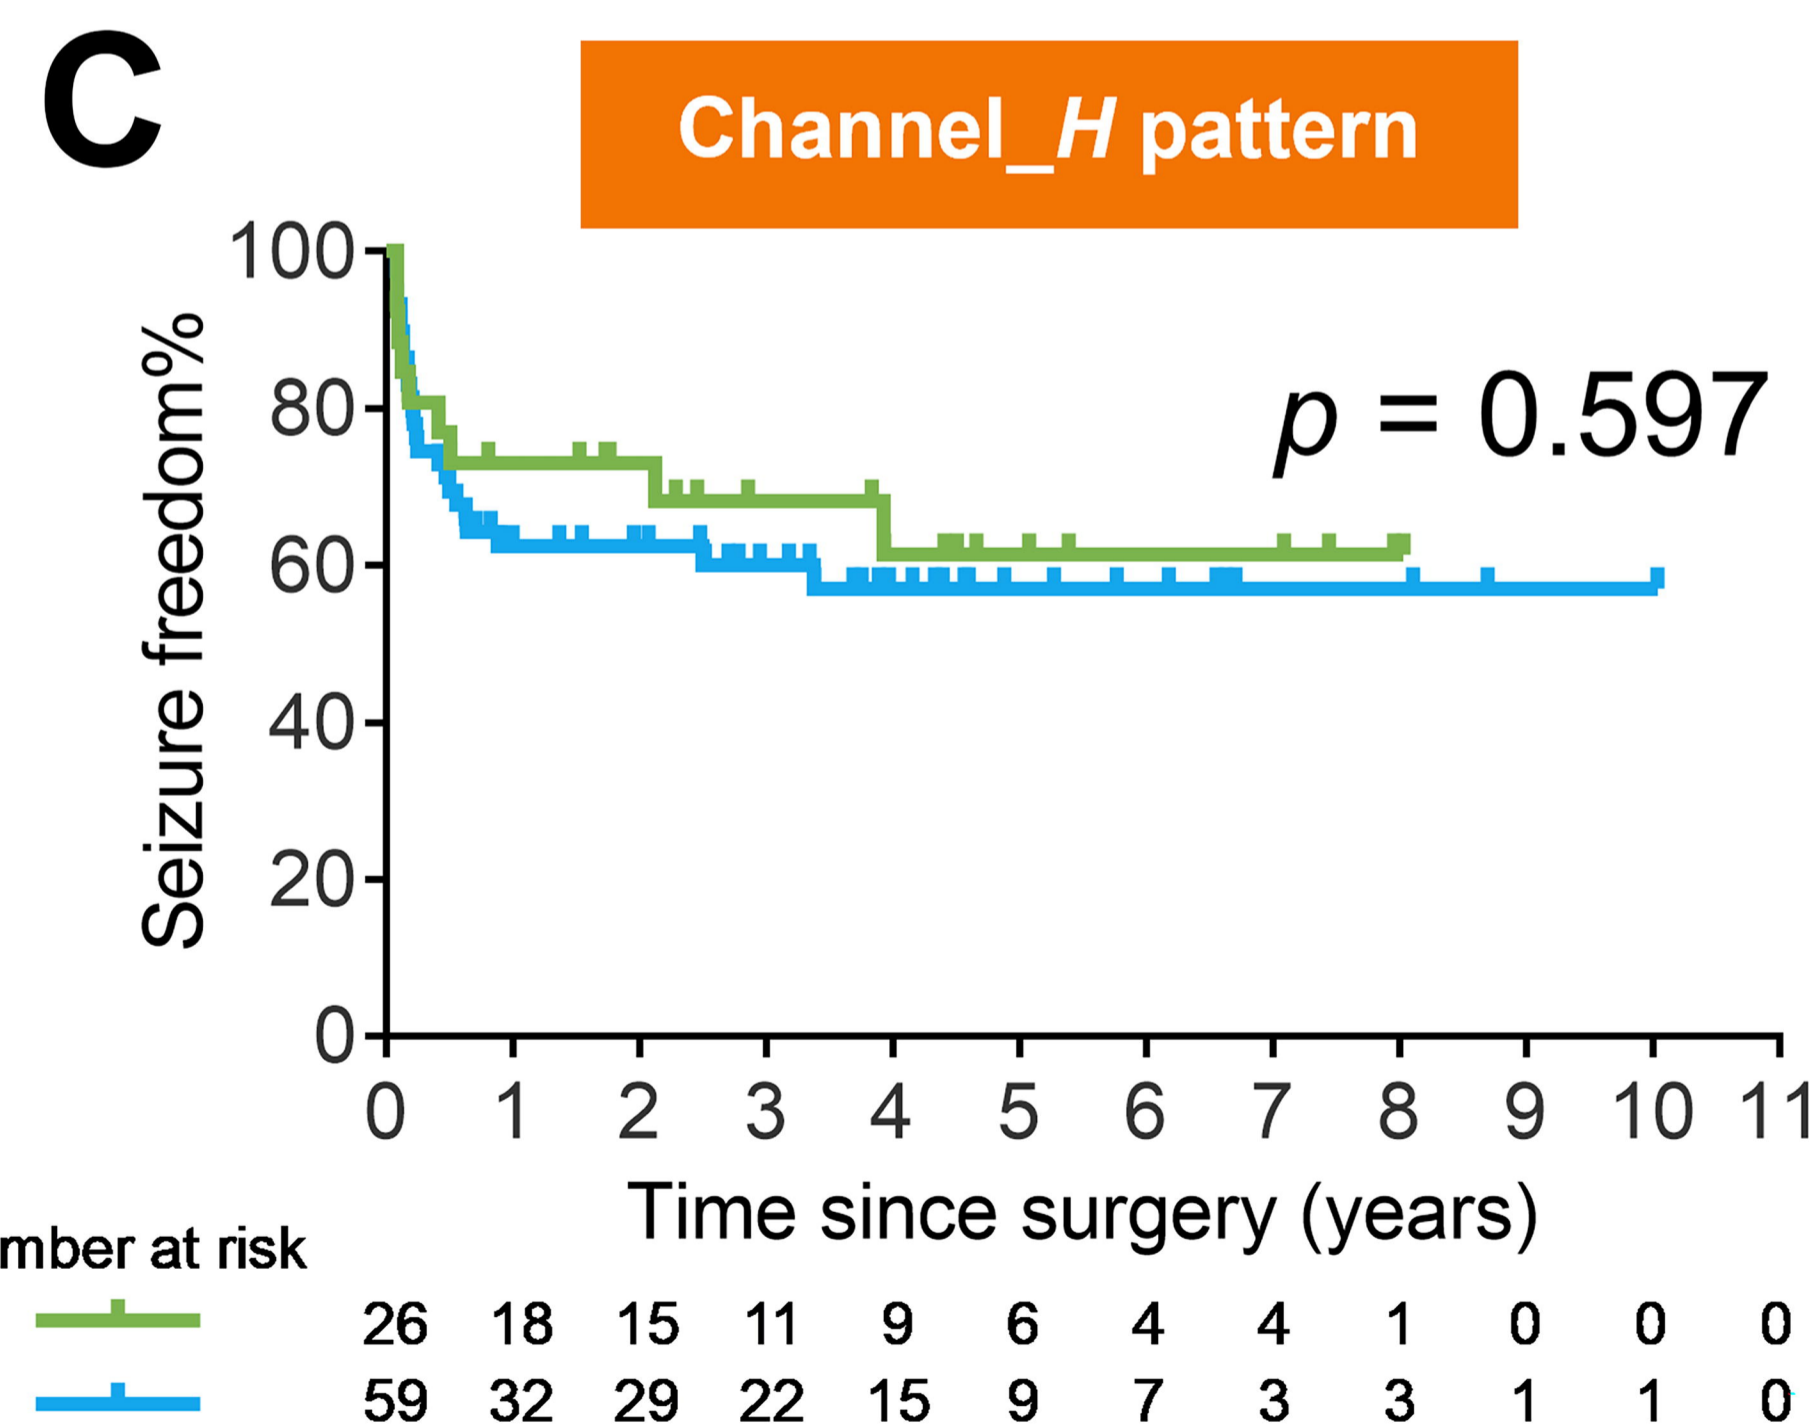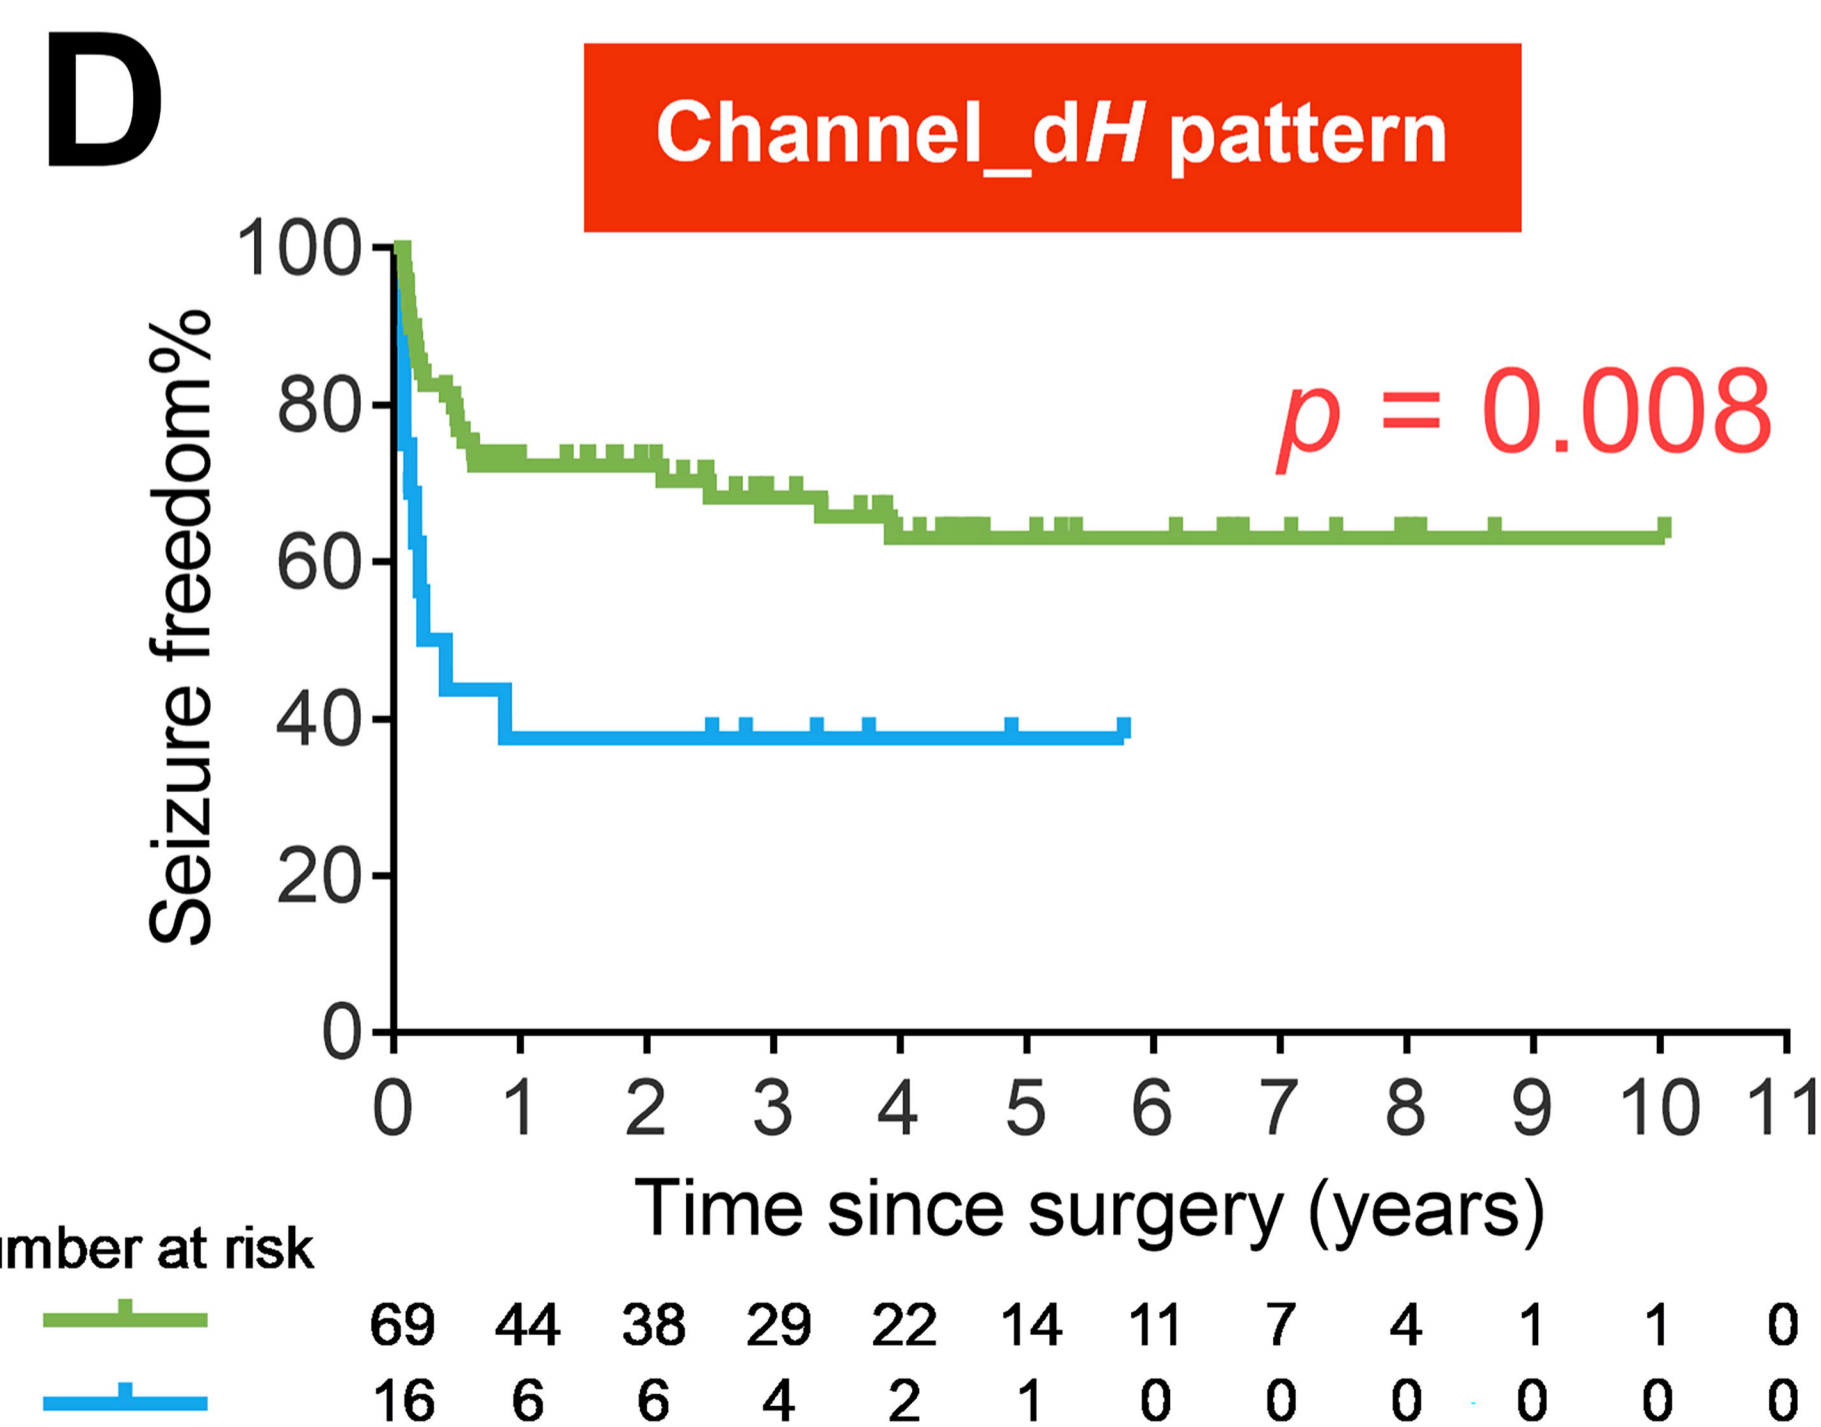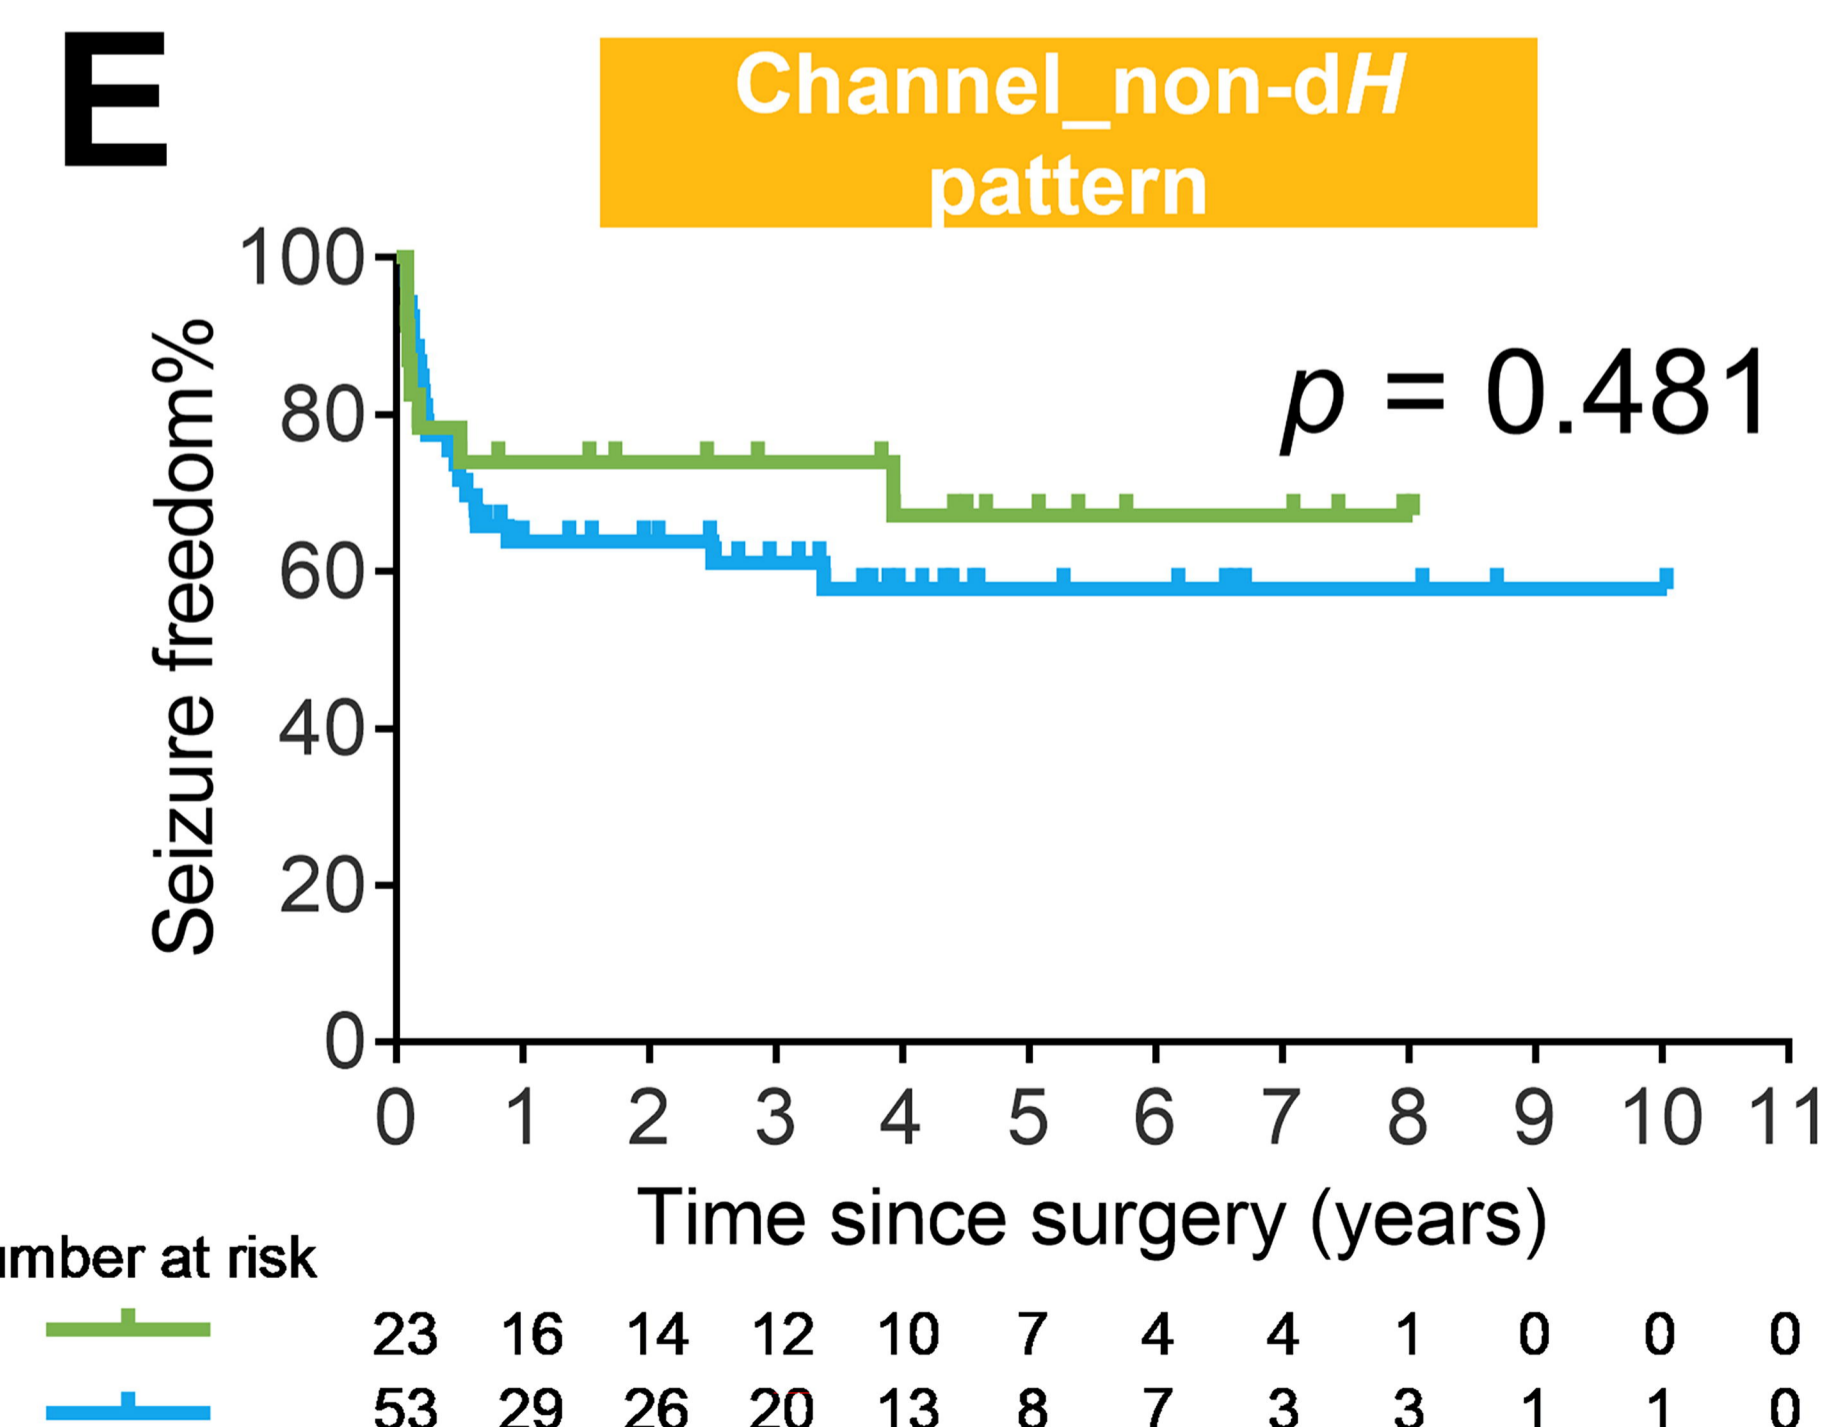

Source: https://medrxiv.org/content/medrxiv/early/2024/09/26/2024.09.25.24314351.full.pdf
